# Supplementary material for: β-Peptides incorporating polyhydroxylated cyclohexane β-amino acid: synthesis and conformational study
Source: Royal Society of Chemistry journal article supplement (doi:10.1039/d3ob00906h), 2023-01-01
Supplement: d3ob00906h1.pdf [file d3ob00906h1.pdf]

## Supporting Information

### **$\beta$ -Peptides incorporating polyhydroxylated cyclohexane $\beta$ -amino acid: synthesis and conformational study**

David Reza, Rosalino Balo, José M. Otero, Ai M. Fletcher, Rebeca García-Fandino, Víctor M. Sánchez-Pedregal, Stephen G. Davies, Ramón J. Estévez, Juan C. Estévez

[juancarlos.estevez@usc.es](mailto:juancarlos.estevez@usc.es)

| section | TABLE OF CONTENTS                                       | page |
|---------|---------------------------------------------------------|------|
| I       | MATERIALS AND INSTRUMENTATION                           | S-2  |
| II      | NMR SPECTRA OF COMPOUNDS <b>3, 4, 5, 6, 7, 8 AND 11</b> | S-3  |
| III     | INFRARED SPECTROSCOPY                                   | S-10 |
| IV      | CIRCULAR DICHROISM                                      | S-13 |
| V       | NMR STRUCTURAL ANALYSIS OF PENTAPEPTIDES <b>14-16</b>   | S-16 |
| VI      | CARTESIAN COORDINATES OF PENTAPEPTIDES <b>14-16</b>     | S-59 |
| VII     | X-RAY OF COMPOUND <b>3</b>                              | S-68 |

## I. MATERIALS AND INSTRUMENTATION

Specific rotations were recorded on a JASCO DIP-370 optical polarimeter. Infrared spectra were recorded on a *MIDAC Prospect FT-IR PerkinElmer Spectrum Two* spectrometer. Nuclear magnetic resonance spectra were recorded on Varian Mercury 300, Bruker Avance III 500 and Bruker NEO 750 spectrometers. Mass spectra were obtained on a Kratos MS 50 TC mass spectrometer. X-ray experiments were obtained with a Bruker Appex II apparatus. Thin layer chromatography (tlc) was performed using Merck GF-254 type 60 silica gel and ethyl EtOAc/hexane mixtures as eluents; the tlc spots were visualized with a Hanessian stain (dipping into a solution of 12.5 g of  $(\text{NH}_4)_4\text{Mo}_7\text{O}_{24}\cdot 4\text{H}_2\text{O}$ , 5 g of  $\text{Ce}(\text{SO}_4)_2\cdot 4\text{H}_2\text{O}$  and 50 mL of  $\text{H}_2\text{SO}_4$  in 450 mL of  $\text{H}_2\text{O}$ , and warming). Column chromatography was carried out using Merck type 9385 silica gel. Solvents were purified as in ref. (Perrin, D. D.; Armarego, W. L. F. *Purification of Laboratory Chemicals*; Pergamon Press: New York, 1988).

## II. NMR SPECTRA OF COMPOUNDS 3, 4, 5, 6, 7, 8 AND 11

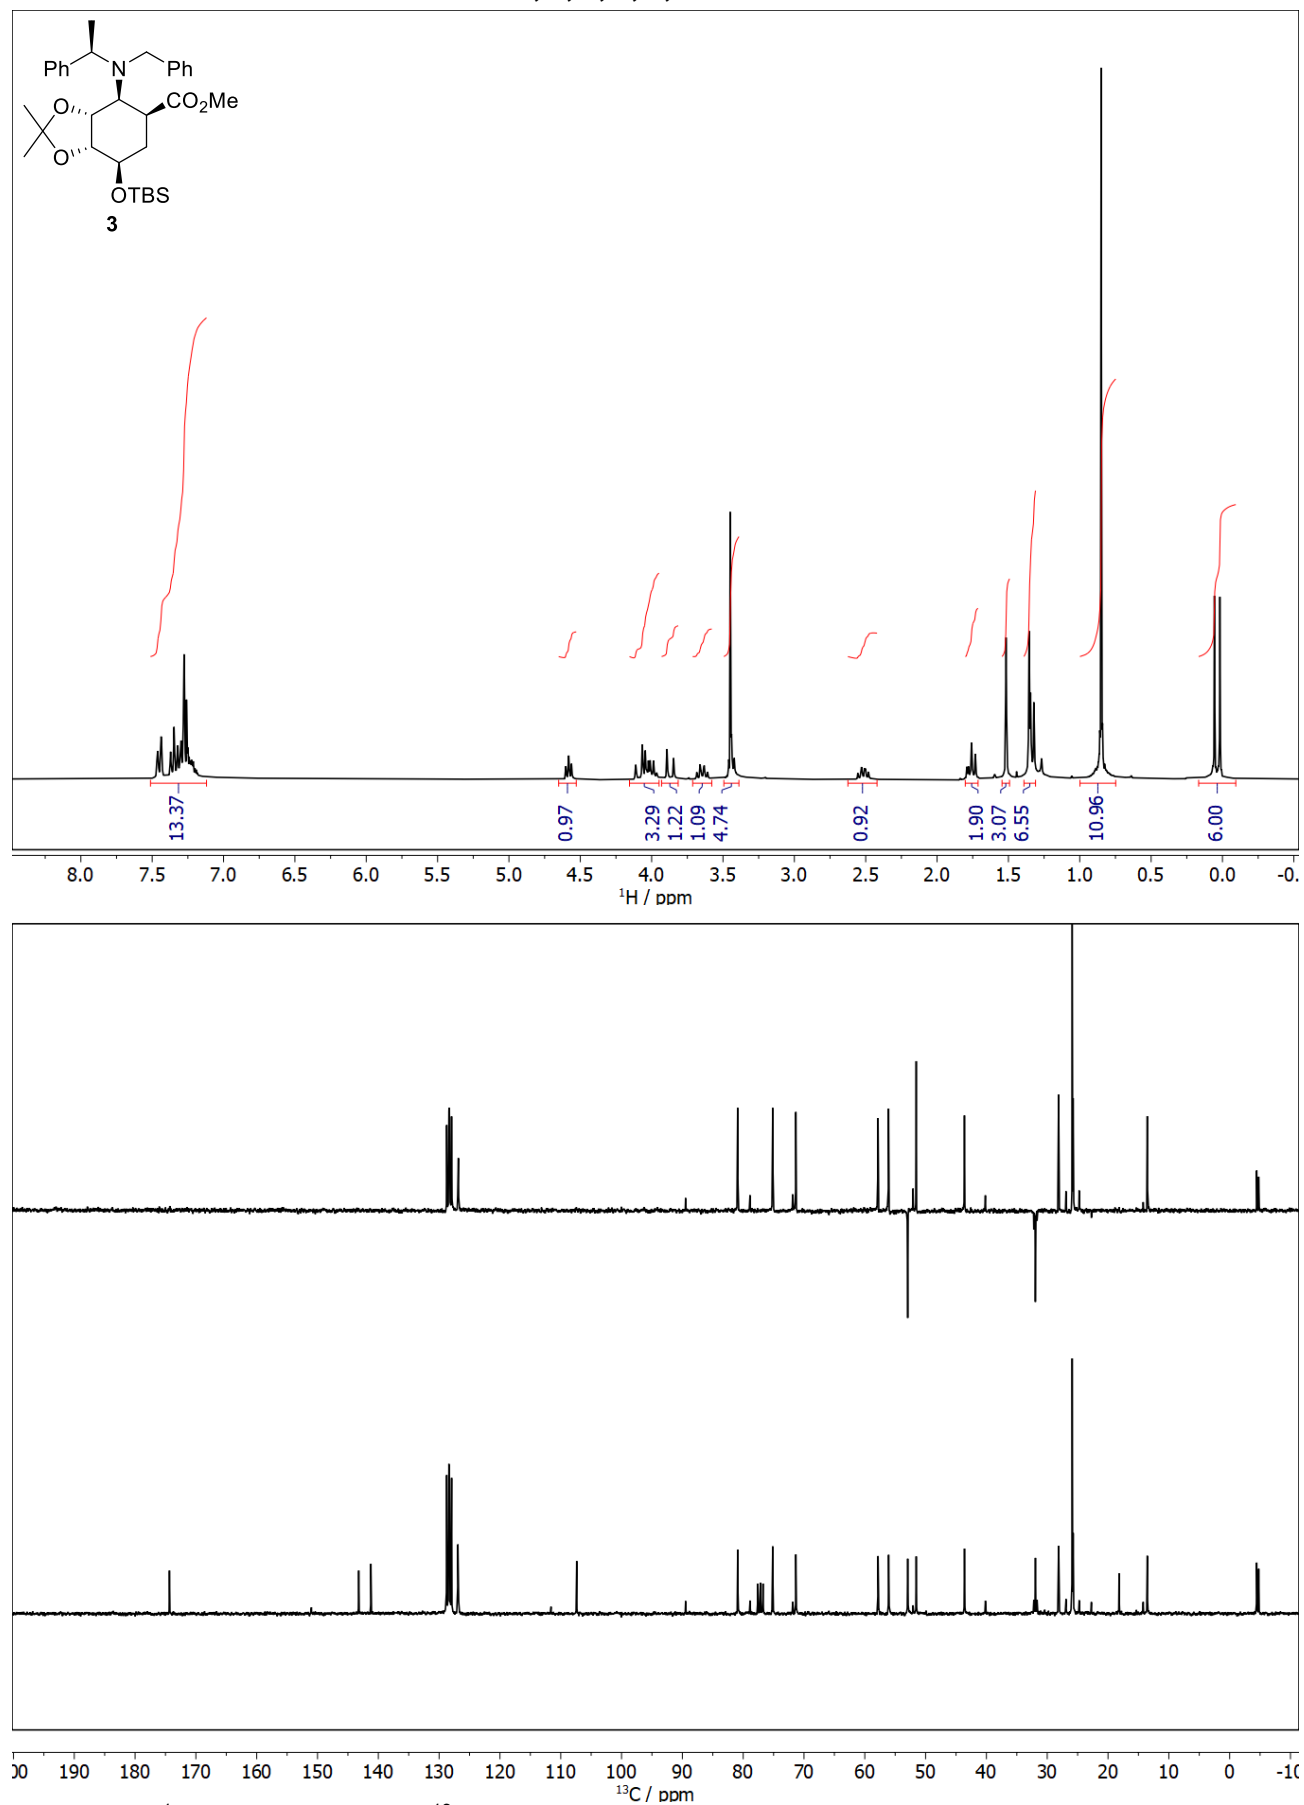

**Figure S1:**  $^1\text{H-NMR}$  (300 MHz),  $^{13}\text{C-NMR}$  and DEPT (75 MHz) of **3** ( $\text{CDCl}_3$ ).

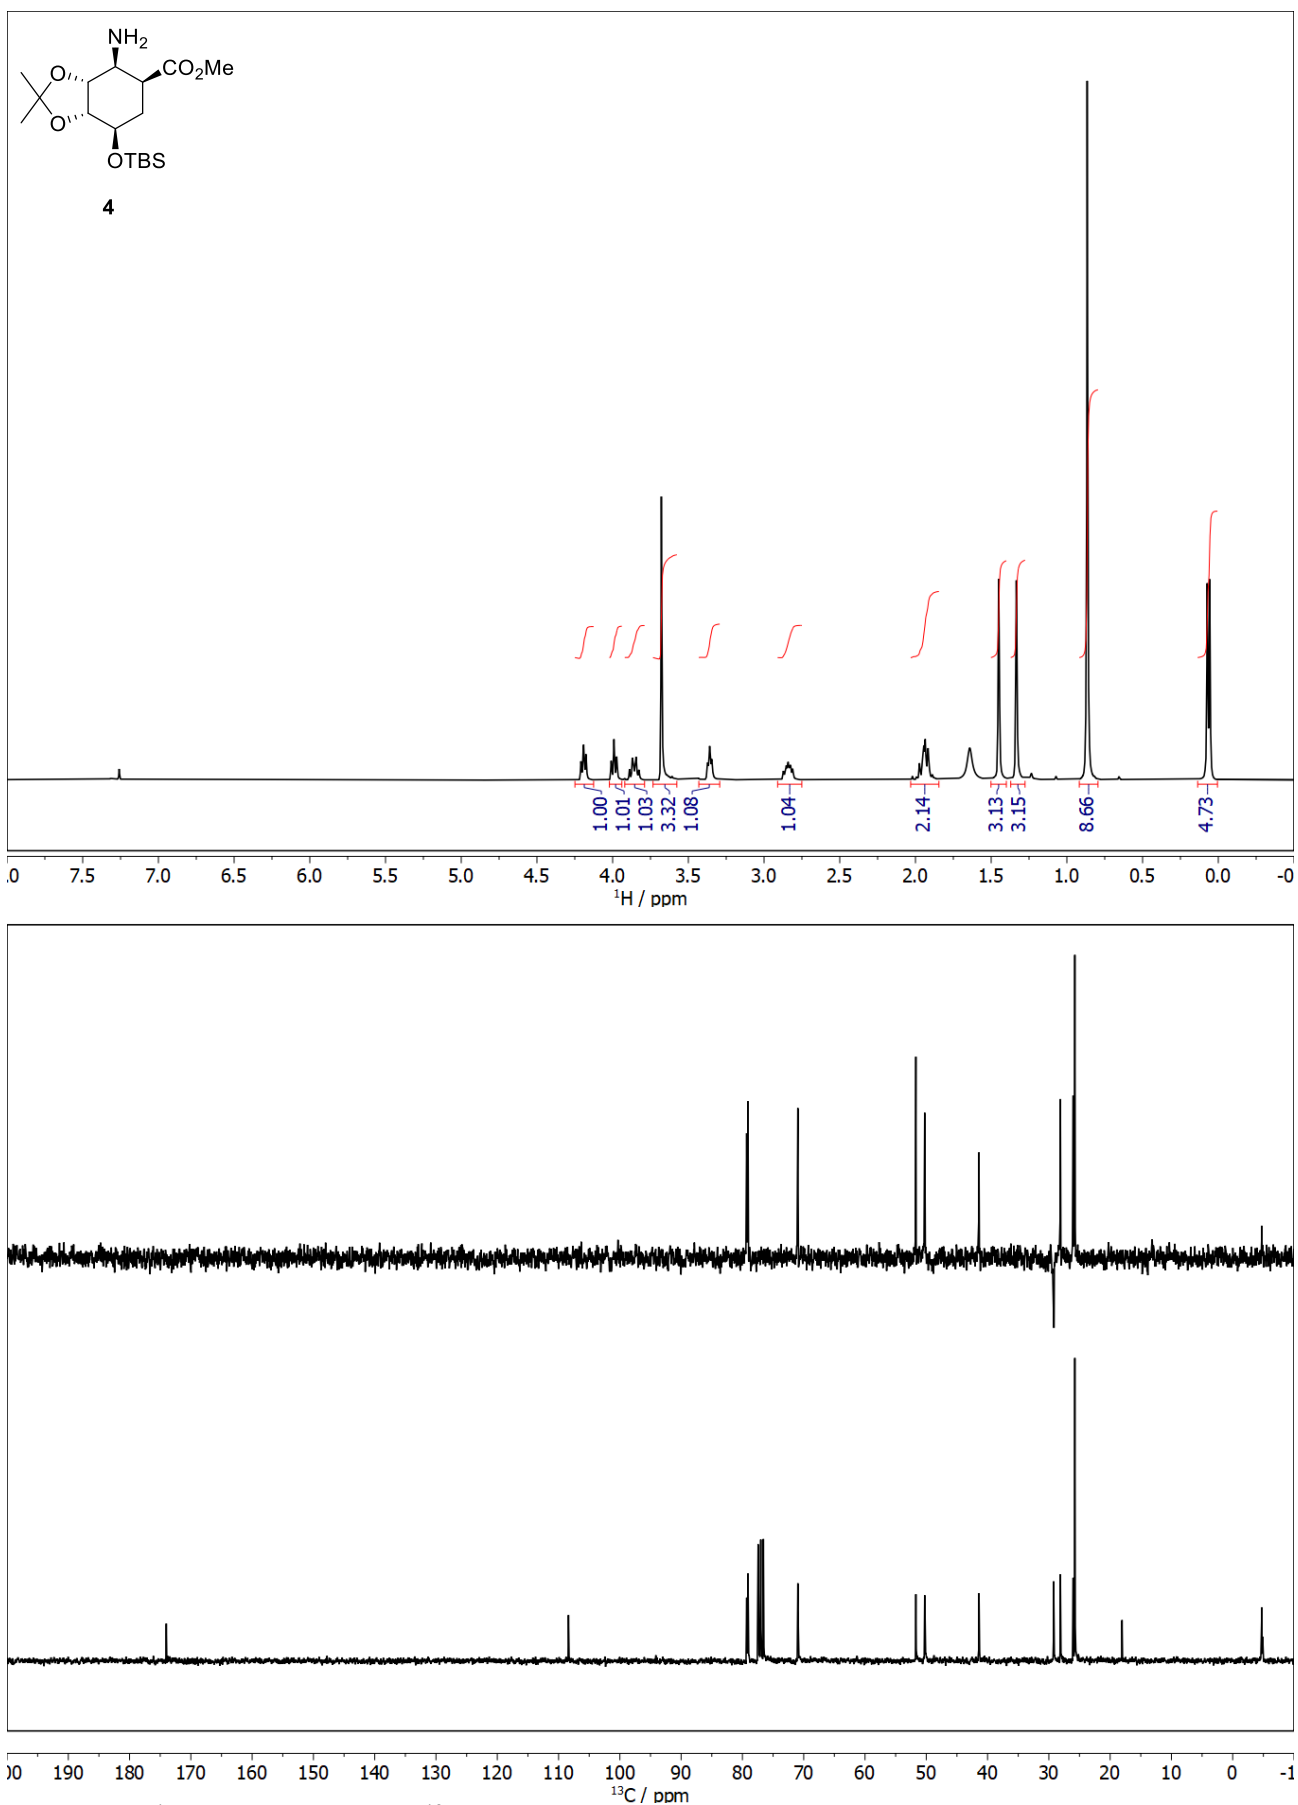

**Figure S2:**  $^1\text{H}$ -NMR (300 MHz),  $^{13}\text{C}$ -NMR and DEPT (75 MHz) of **4** ( $\text{CDCl}_3$ ).



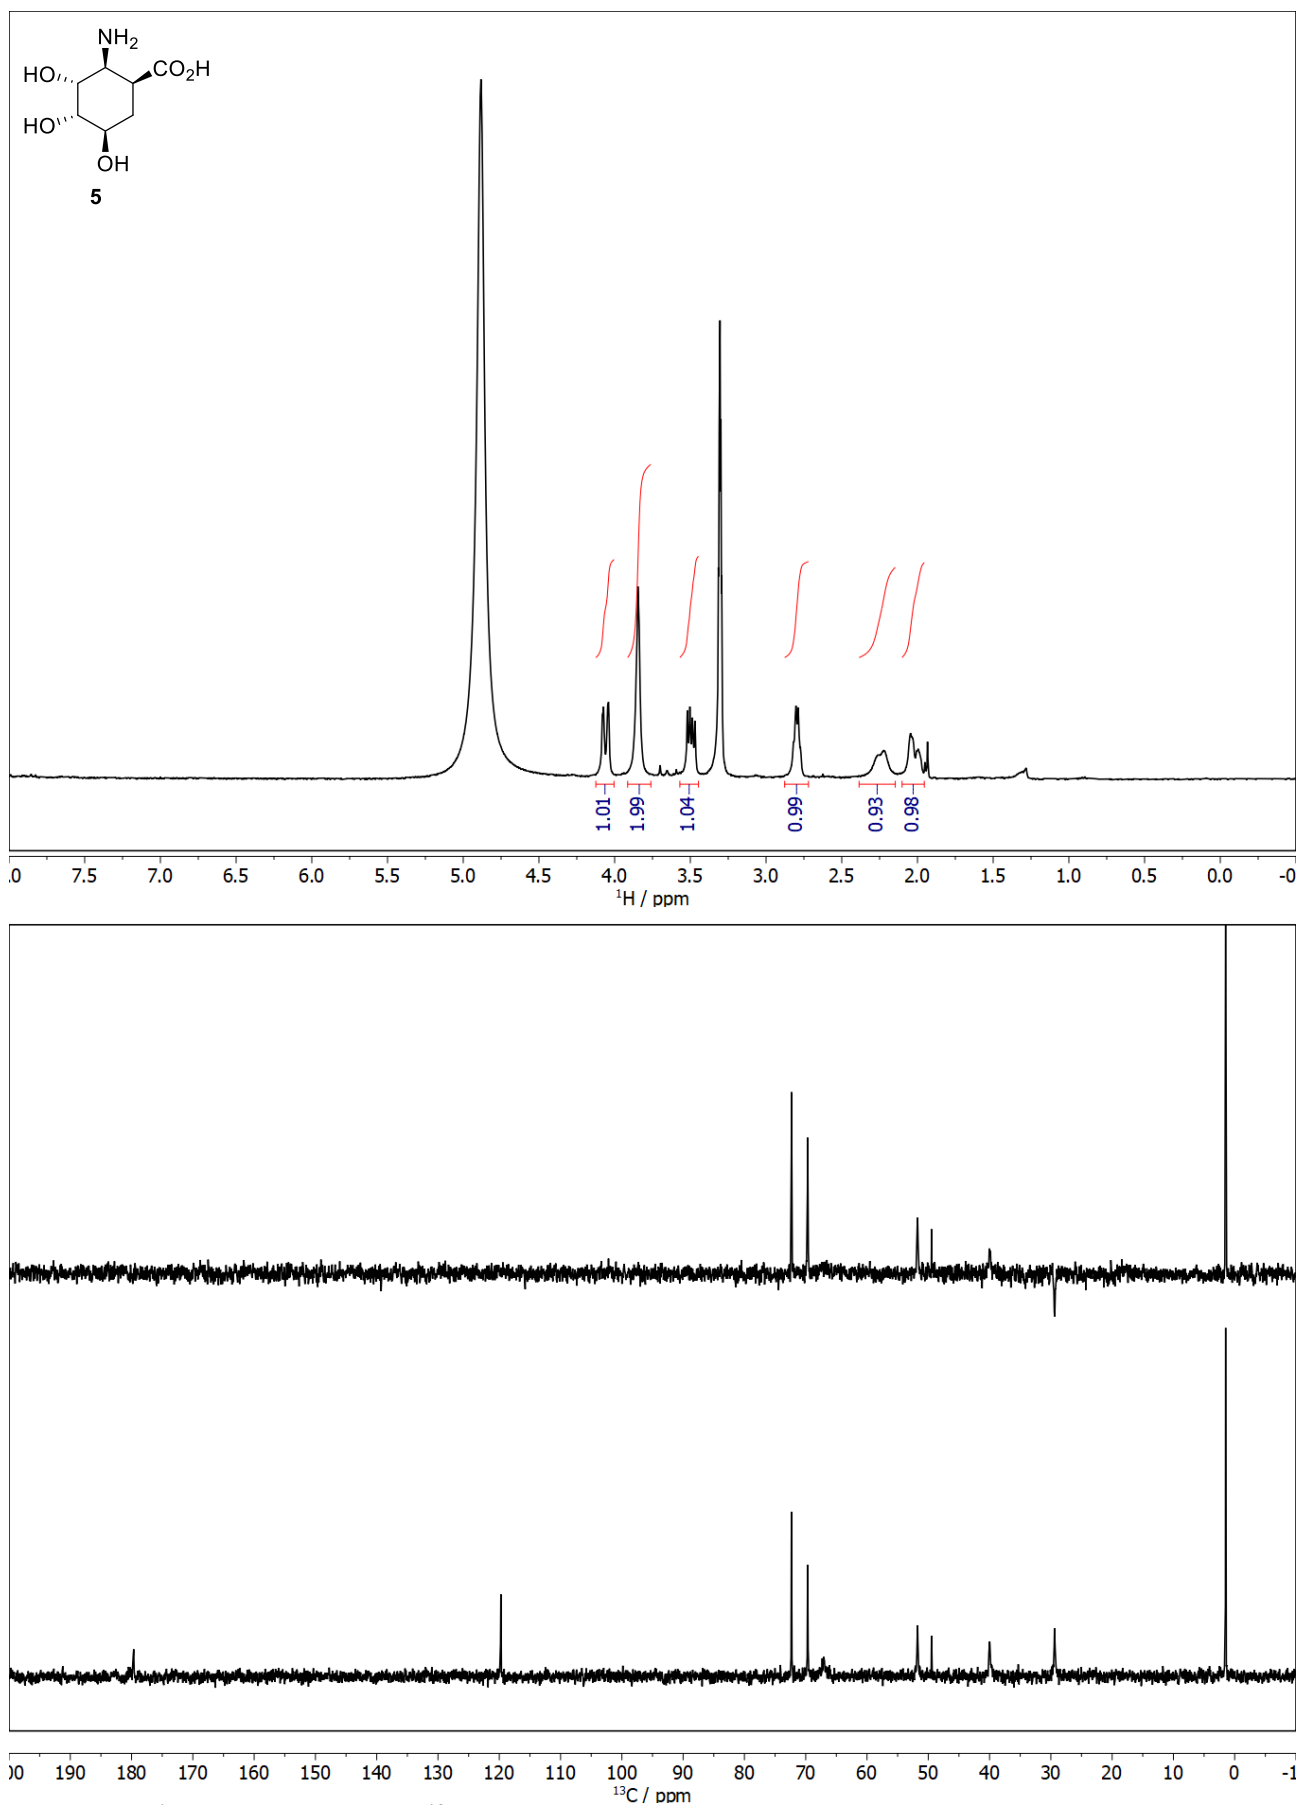

**Figure S3:**  $^1\text{H}$ -NMR (300 MHz),  $^{13}\text{C}$ -NMR and DEPT (75 MHz) of **5** ( $\text{D}_2\text{O}$ ).

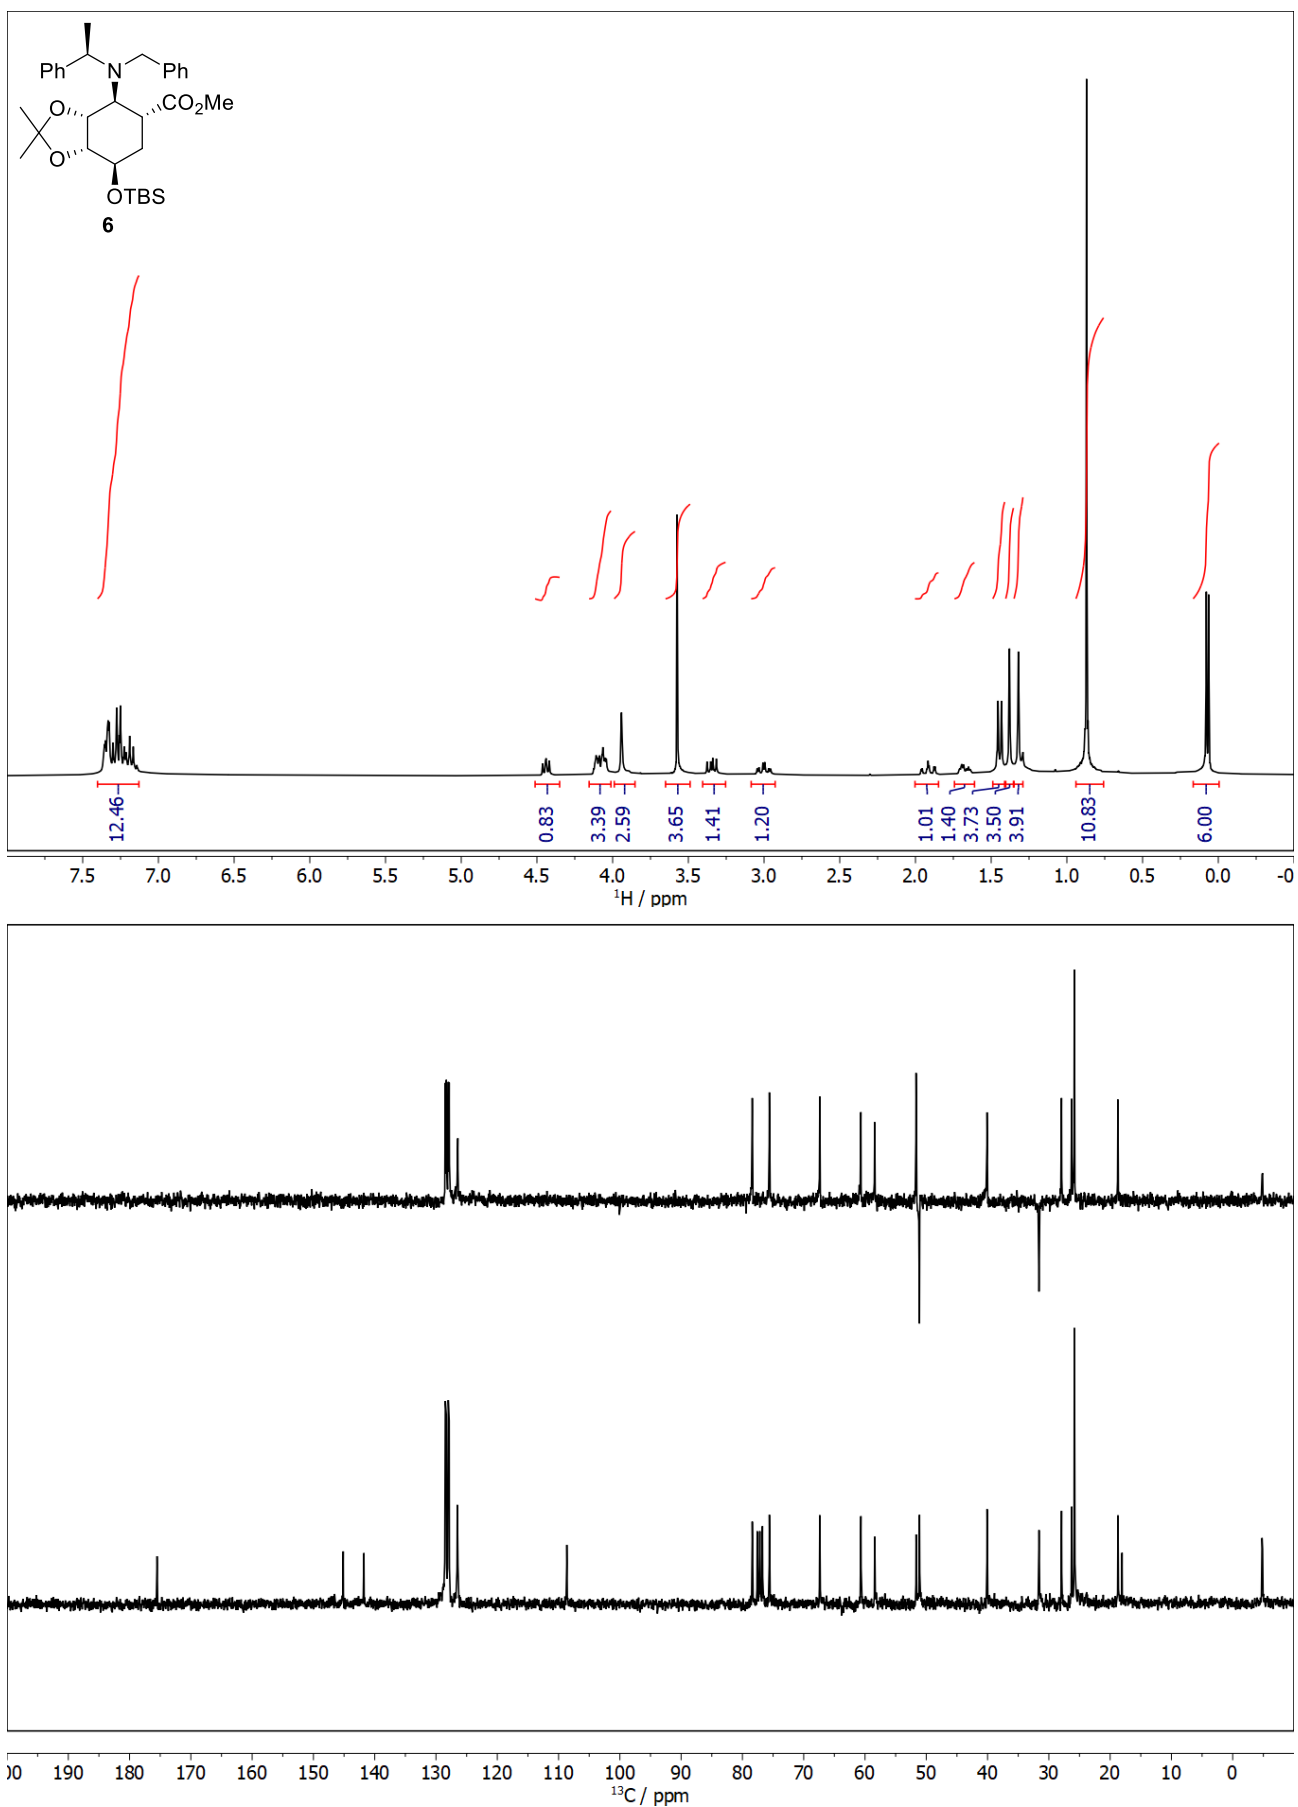

**Figure S4:**  $^1\text{H}$ -NMR (300 MHz),  $^{13}\text{C}$ -NMR and DEPT (75 MHz) of **6** ( $\text{CDCl}_3$ ).

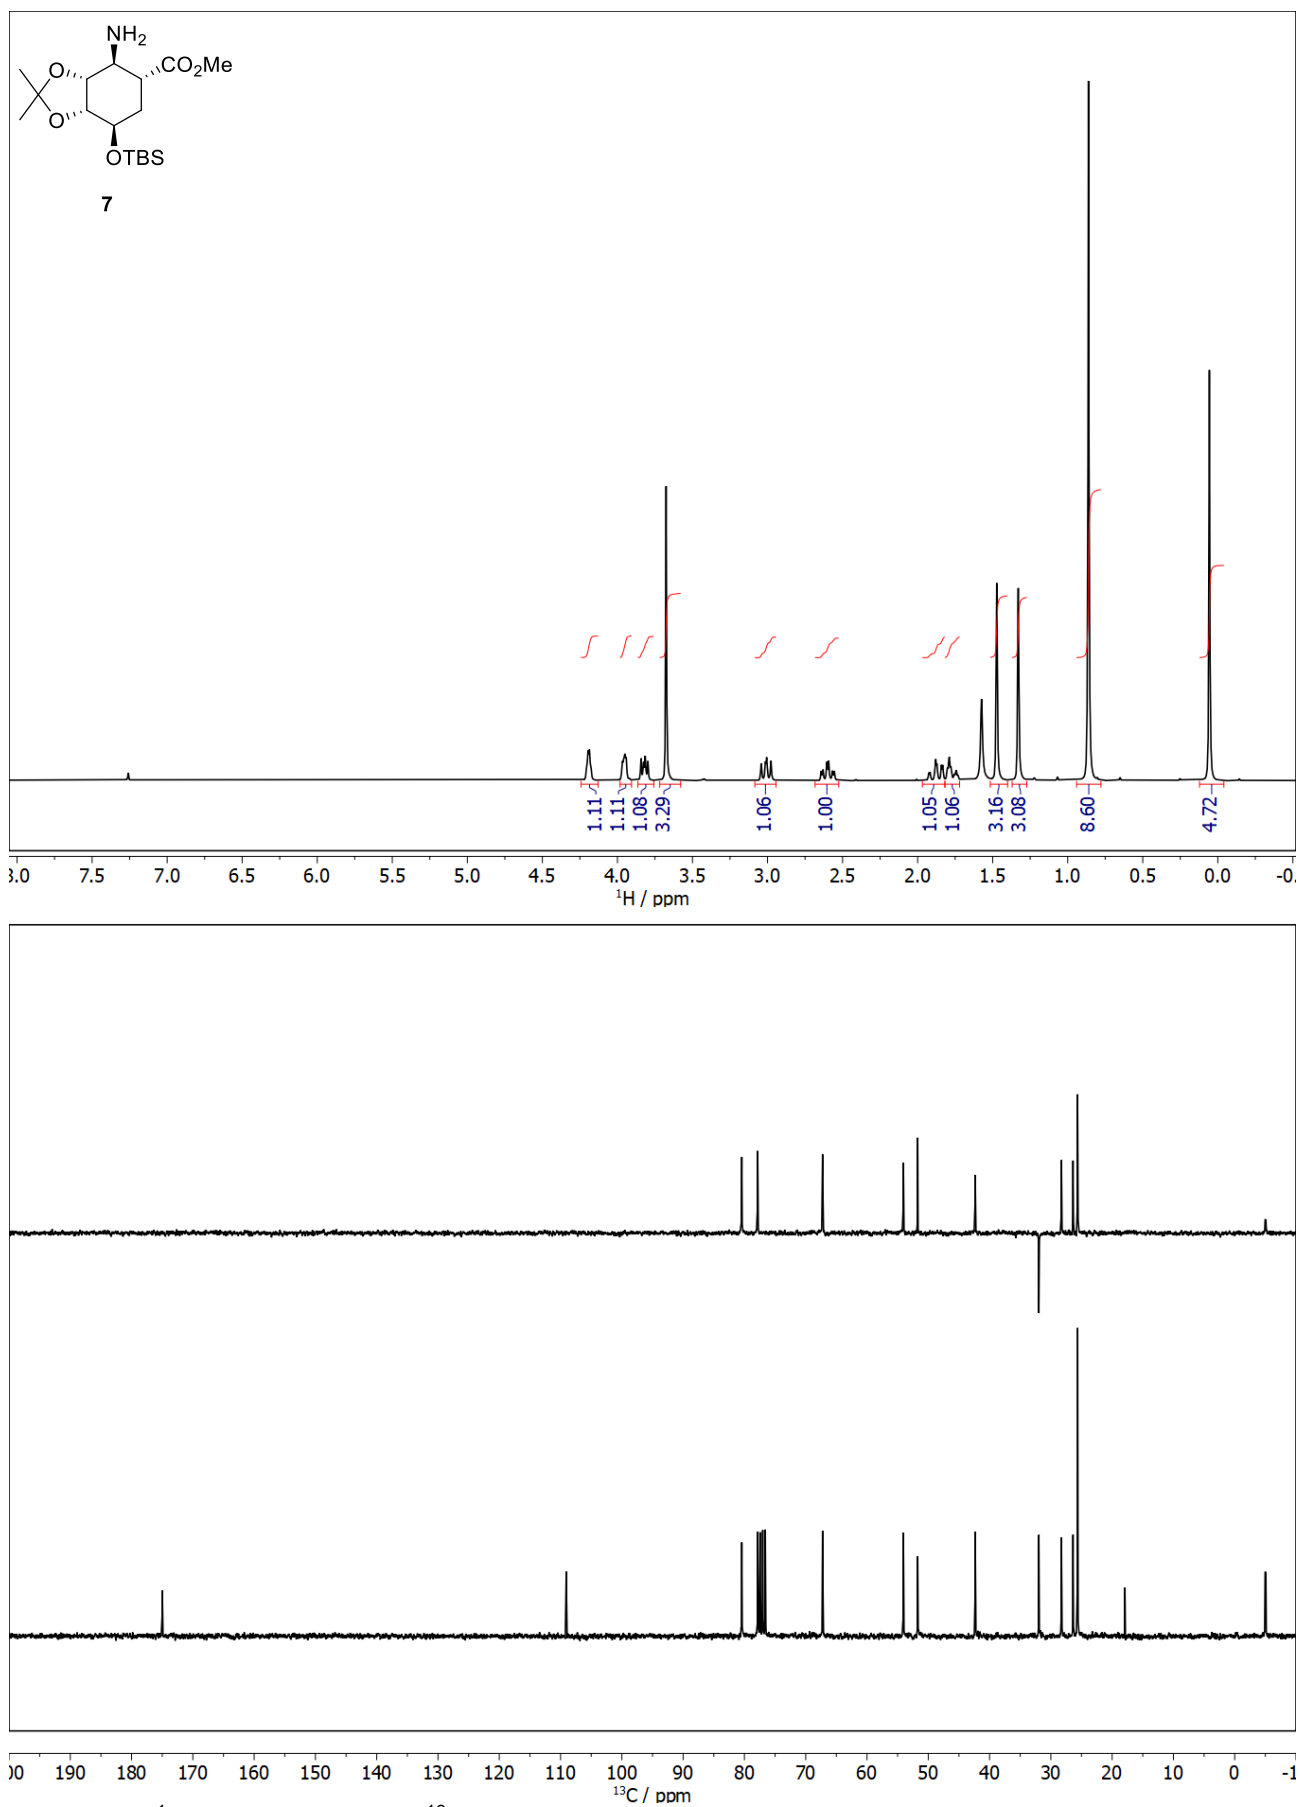

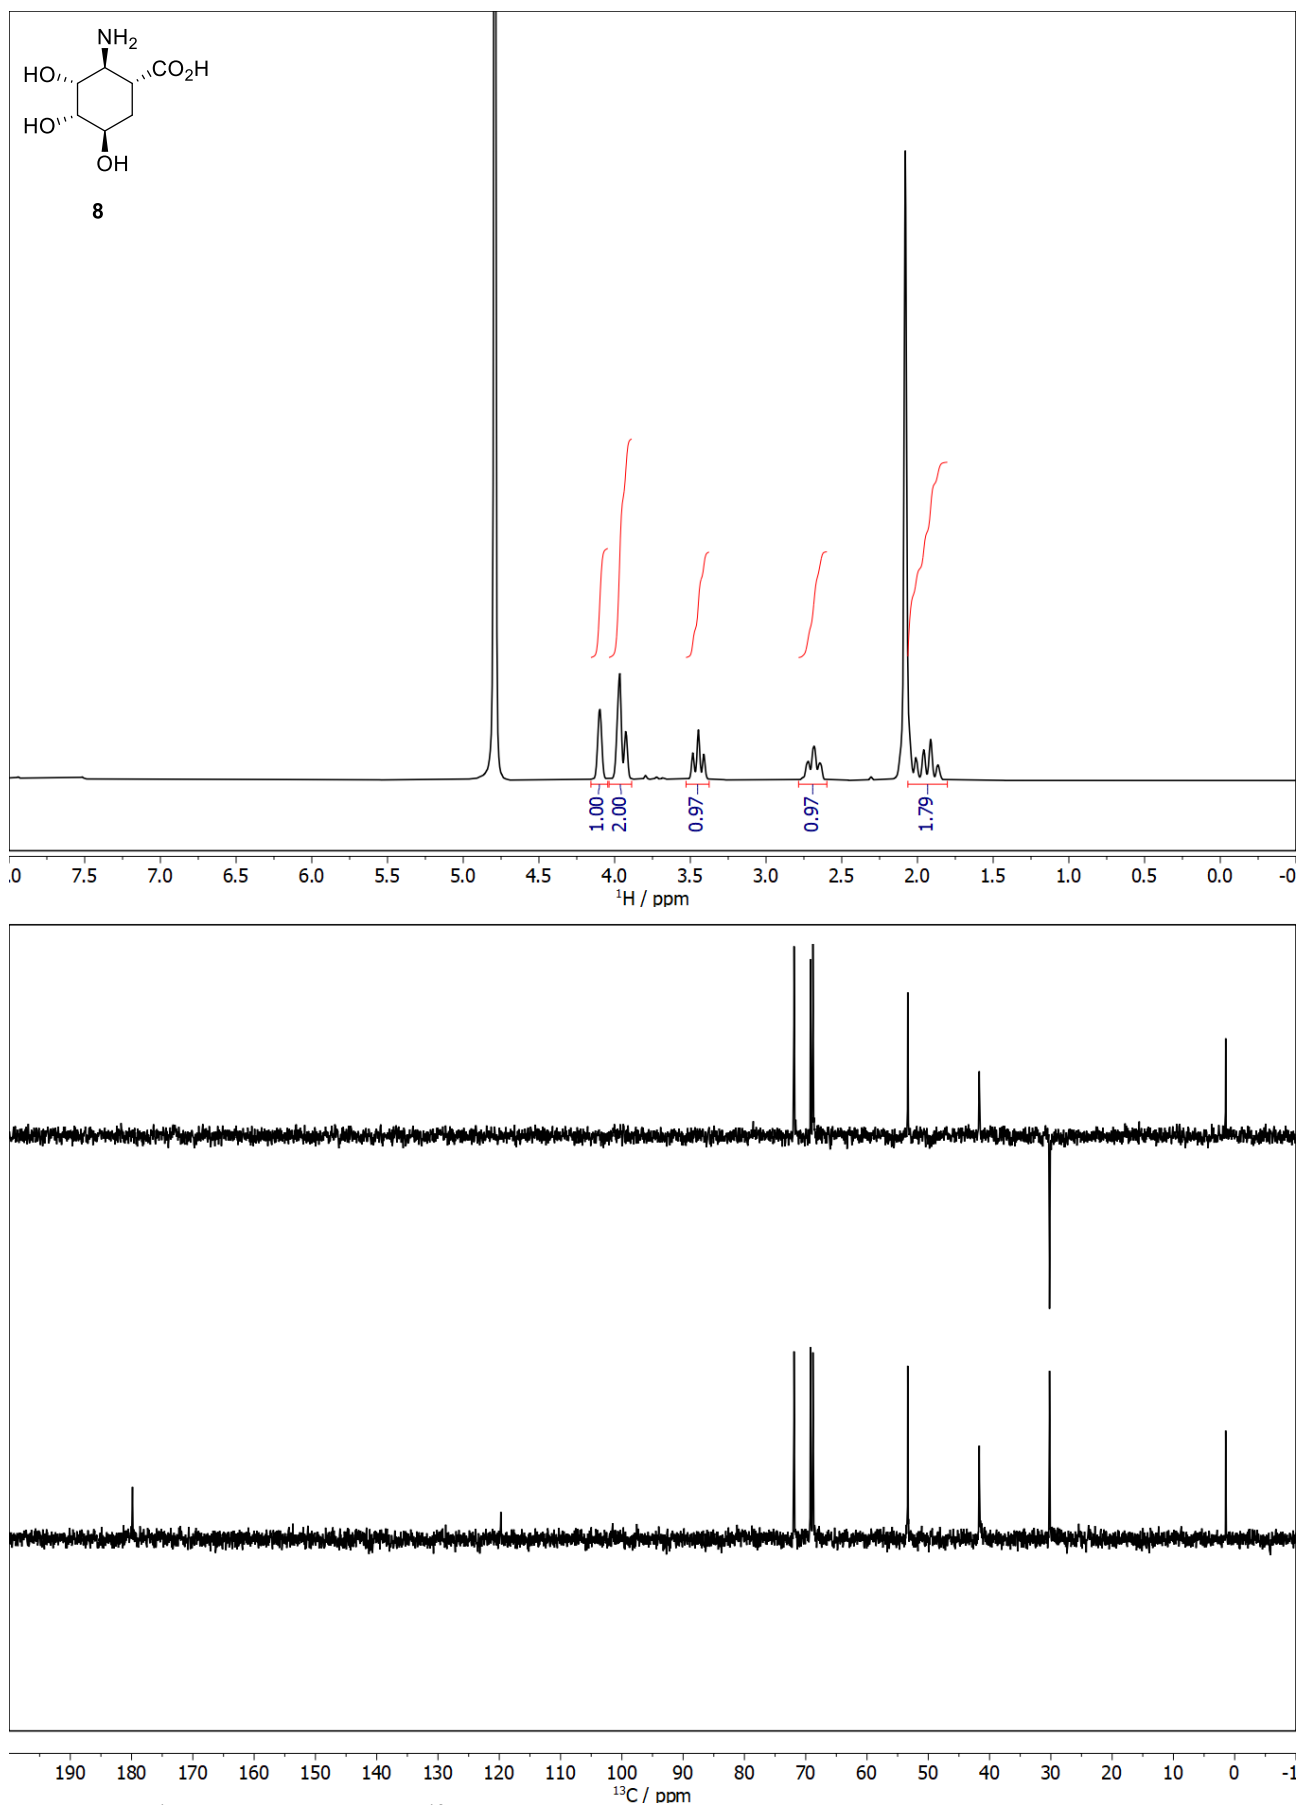

**Figure S6:**  $^1\text{H}$ -NMR (300 MHz),  $^{13}\text{C}$ -NMR and DEPT (75 MHz) of **8** ( $\text{D}_2\text{O}$ ).

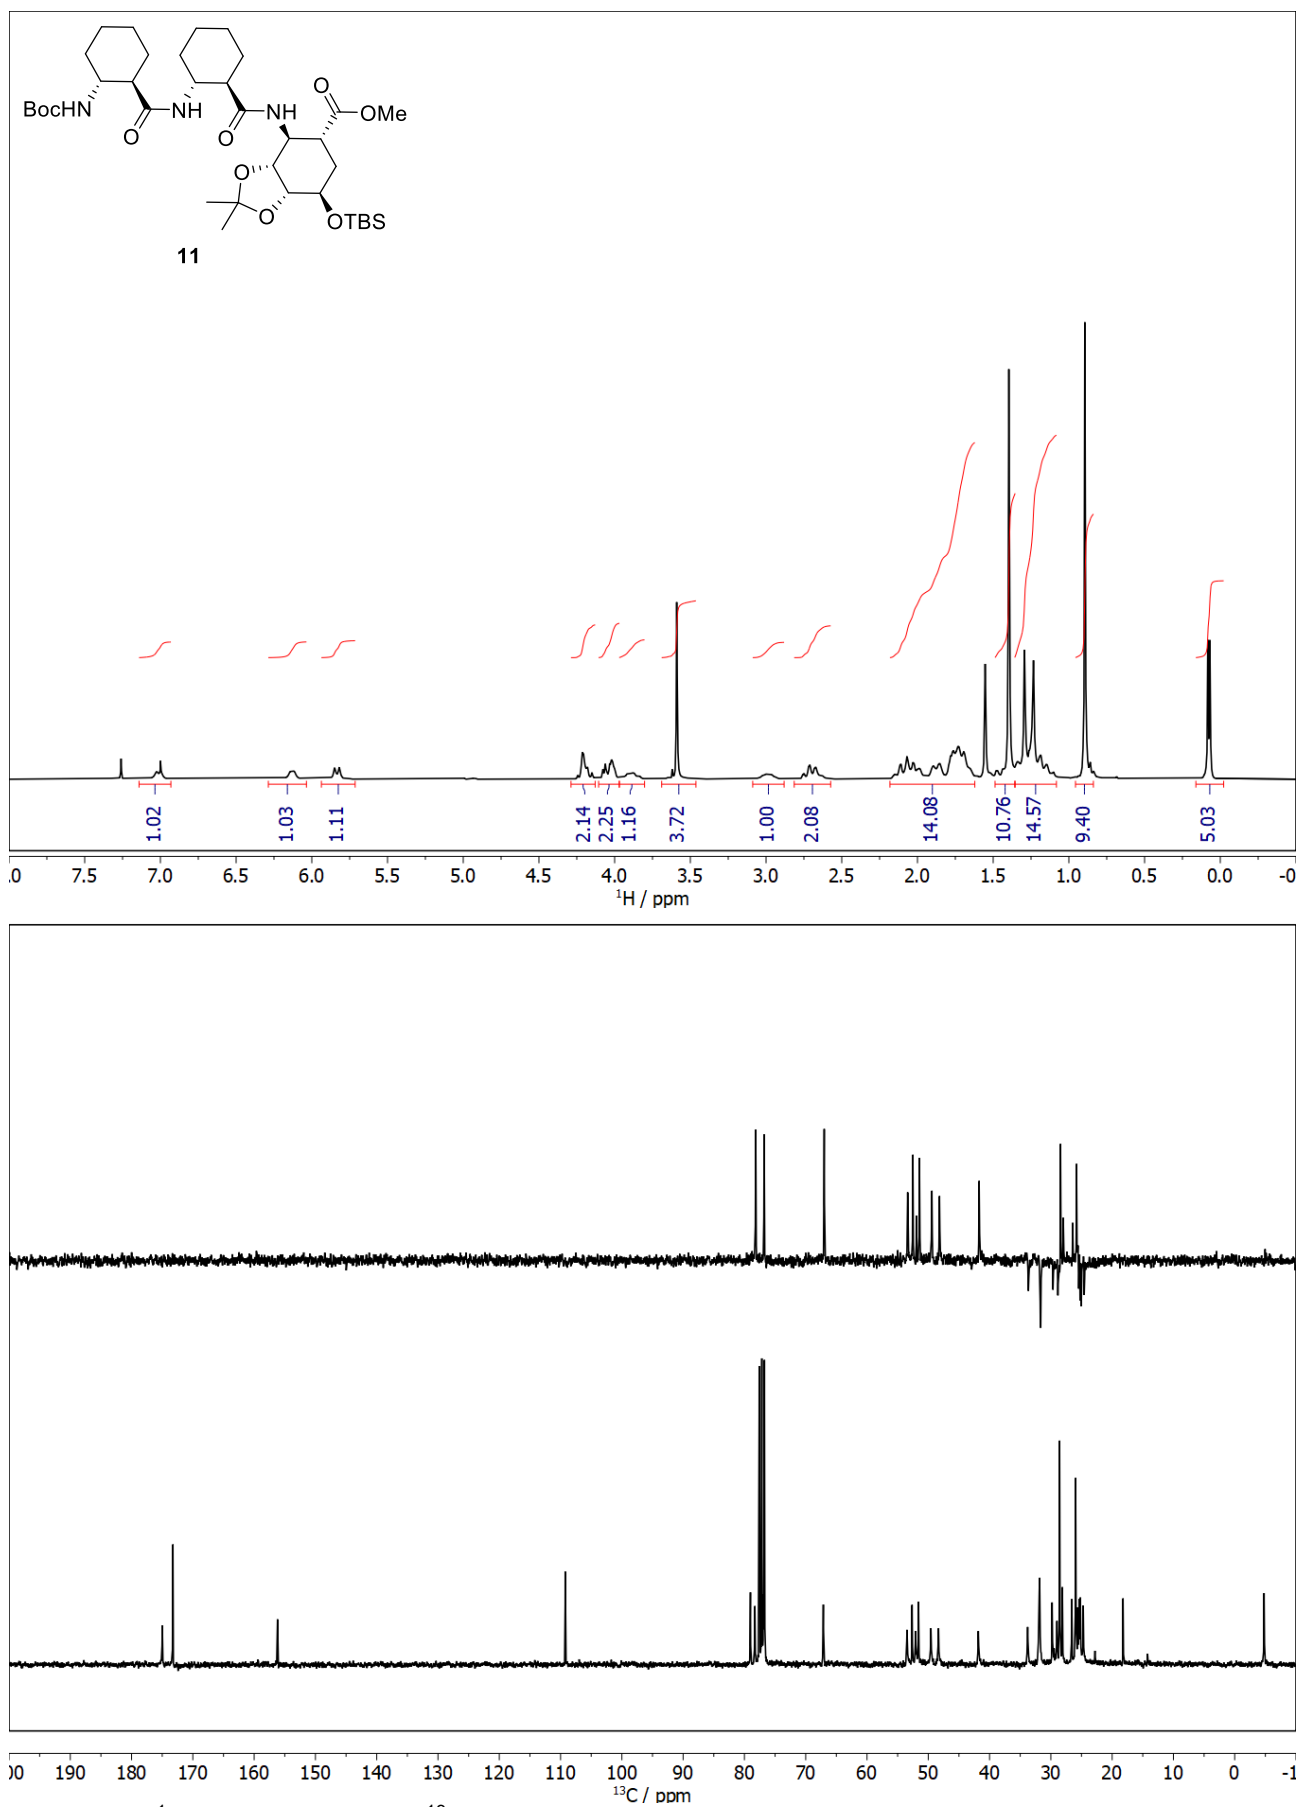

### III. INFRARED SPECTROSCOPY

**Table S1:** Maxima ( $\text{cm}^{-1}$ ) of the Amide A, Amide I, and Amide II characteristic bands for **9**, **11**, **14**, **15**, and **16**.

| Compound  | Amide A | Amide I | Amide II |
|-----------|---------|---------|----------|
| <b>9</b>  | 3297.27 | 1646.47 | 1533.44  |
| <b>11</b> | 3327.38 | 1679.77 | 1527.80  |
| <b>14</b> | 3281.07 | 1644.93 | 1535.61  |
| <b>15</b> | 3369.60 | 1649.42 | 1547.16  |
| <b>16</b> | 3269.40 | 1649.50 | 1546.80  |

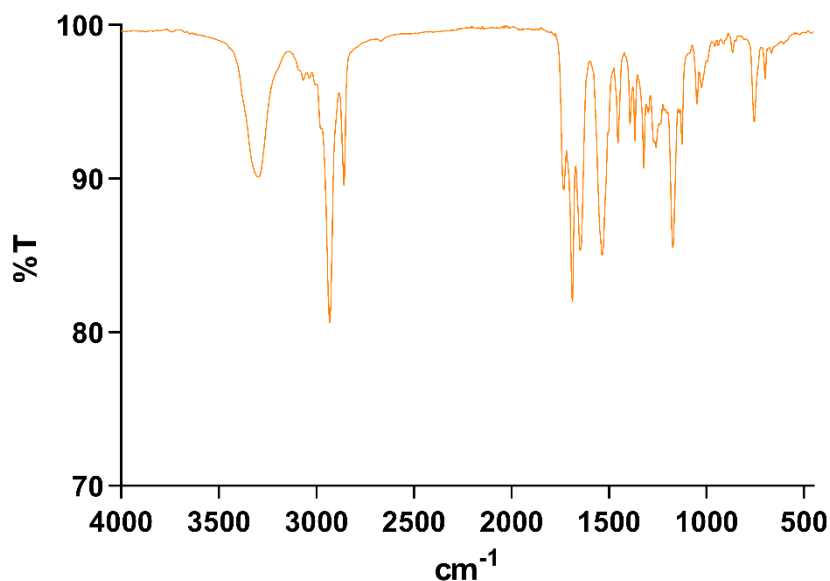

**Figure S8:** FTIR spectrum of **9** (Boc-*trans*-(ACHC)<sub>2</sub>-OBn).

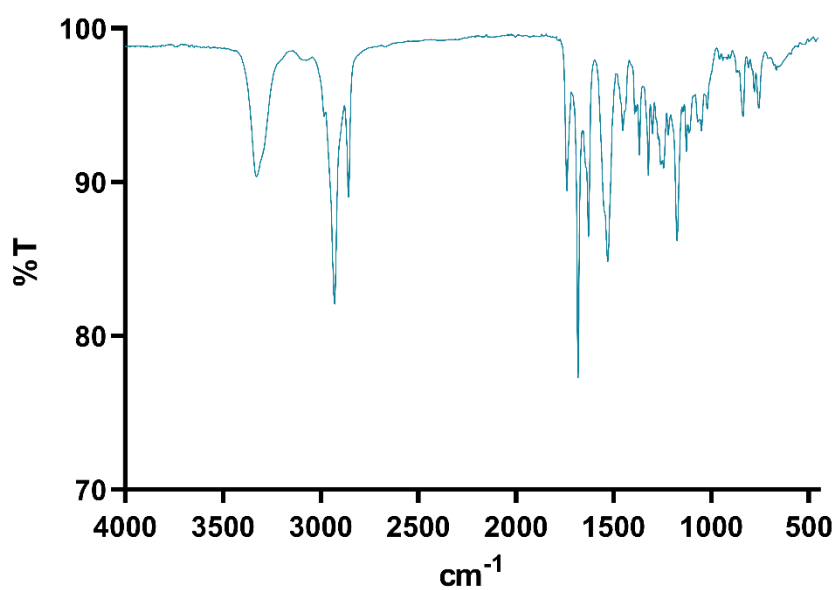

**Figure S9:** FTIR spectrum of **11**.

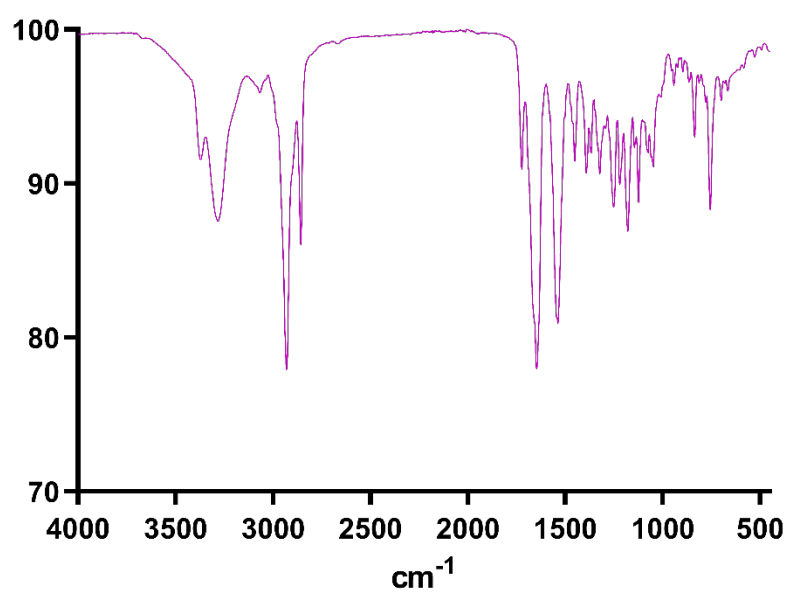

Figure S10: FTIR spectrum of 14.

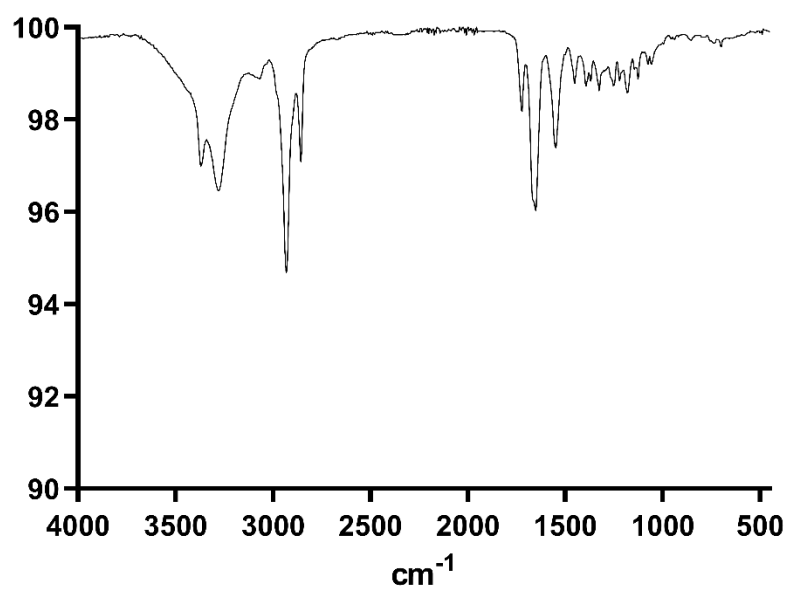

Figure S11: FTIR spectrum of 15.

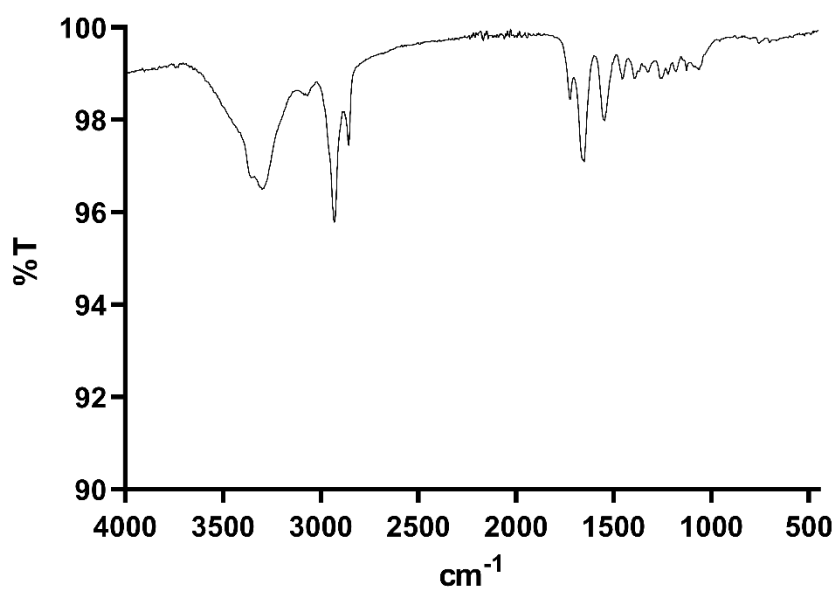

**Figure S12:** FTIR spectrum of 16.



#### IV. CIRCULAR DICHROISM

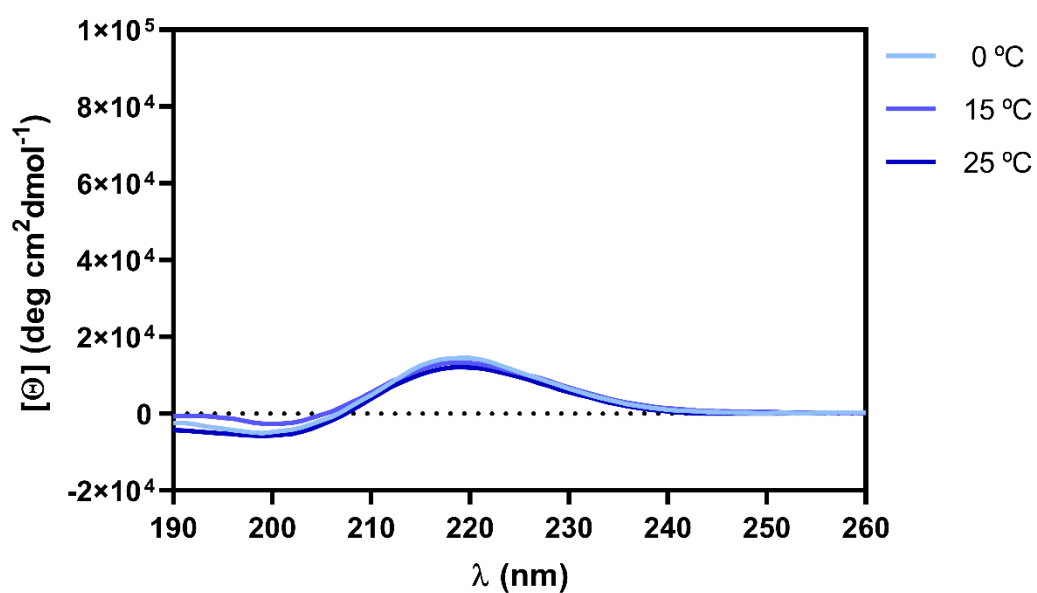

**Figure S13:** Circular dichroism data for **9** in methanol ( $c = 1$  mM;  $T = 0, 15$  and  $25$  °C).

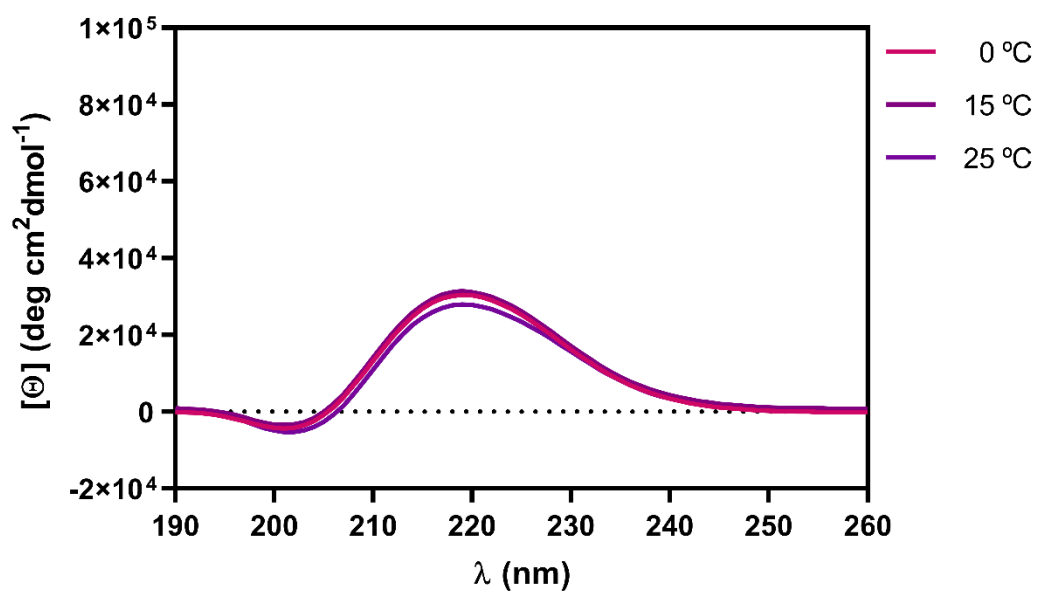

**Figure S14:** Circular dichroism data for **11** in methanol ( $c = 1$  mM;  $T = 0, 15$  and  $25$  °C).

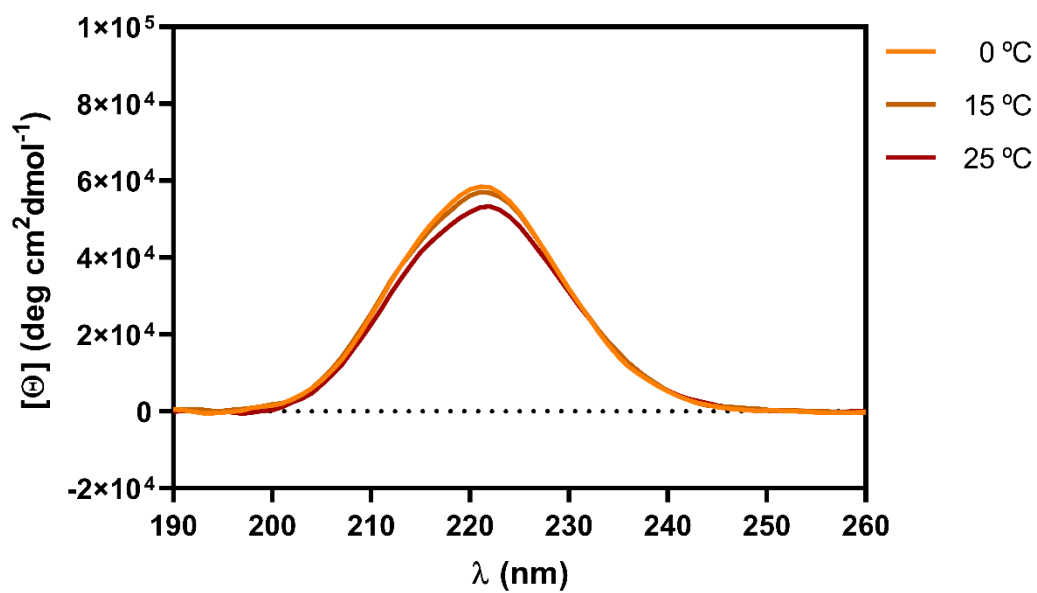

**Figure S15:** Circular dichroism data for **14** in methanol ( $c = 1 \text{ mM}$ ;  $T = 0, 15$  and  $25 \text{ }^\circ\text{C}$ ).

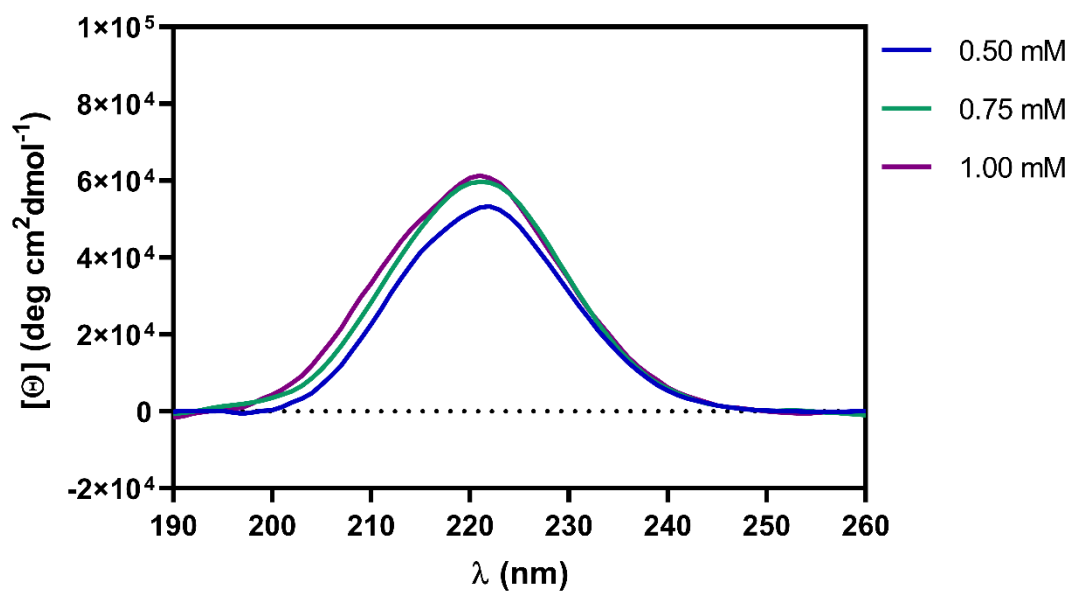

**Figure S16:** Circular dichroism data for **14** in methanol ( $c = 0.5 \text{ mM}, 0.75 \text{ mM}$  and  $1 \text{ mM}$ ;  $T = 25 \text{ }^\circ\text{C}$ ).

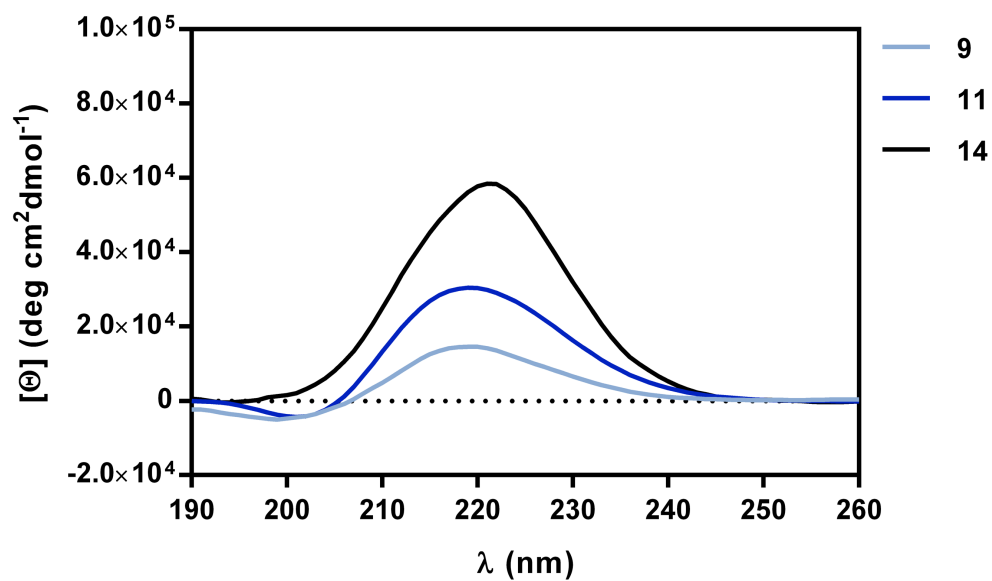

**Figure S17:** Circular dichroism data for **9**, **11** and **14** in methanol ( $c = 1 \text{ mM}$ ;  $T = 25 \text{ }^\circ\text{C}$ ).

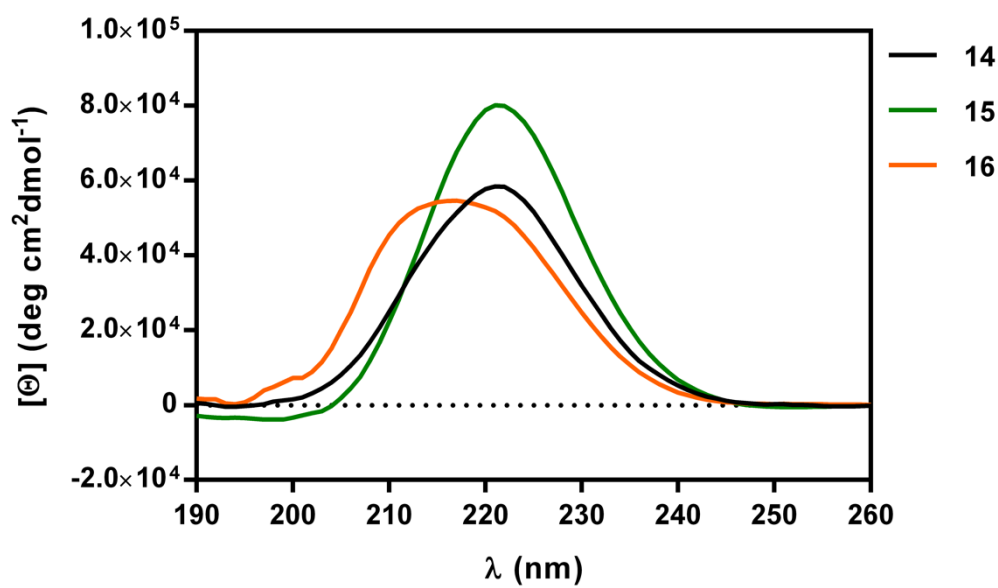

**Figure S18:** Circular dichroism data for peptides **14**, **15** and **16** in methanol ( $c = 1 \text{ mM}$ ;  $T = 25 \text{ }^\circ\text{C}$ ).

## V. NMR STRUCTURAL ANALYSIS OF PENTAPEPTIDES 14, 15, AND 16

### V-A. Peptide 14: NMR spectroscopy in DMSO- $d_6$

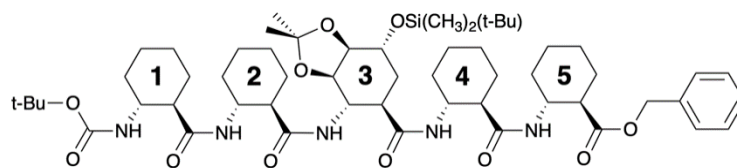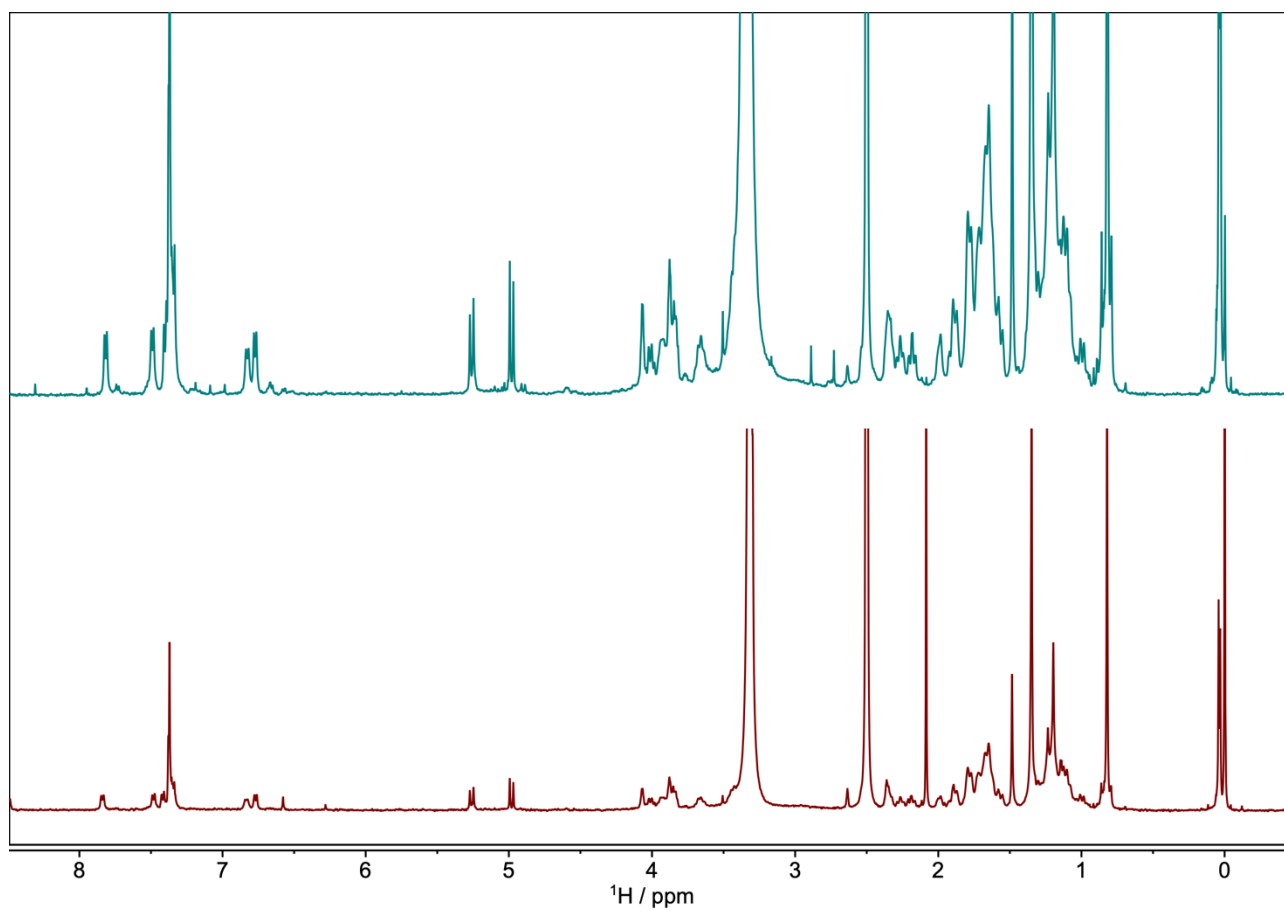

**Figure S19:**  $^1\text{H}$ -NMR spectrum of peptide 14 at concentrations of 0.4 mM (bottom) and 1.5 mM (top). Conditions: DMSO- $d_6$ , 500 MHz, 298 K.

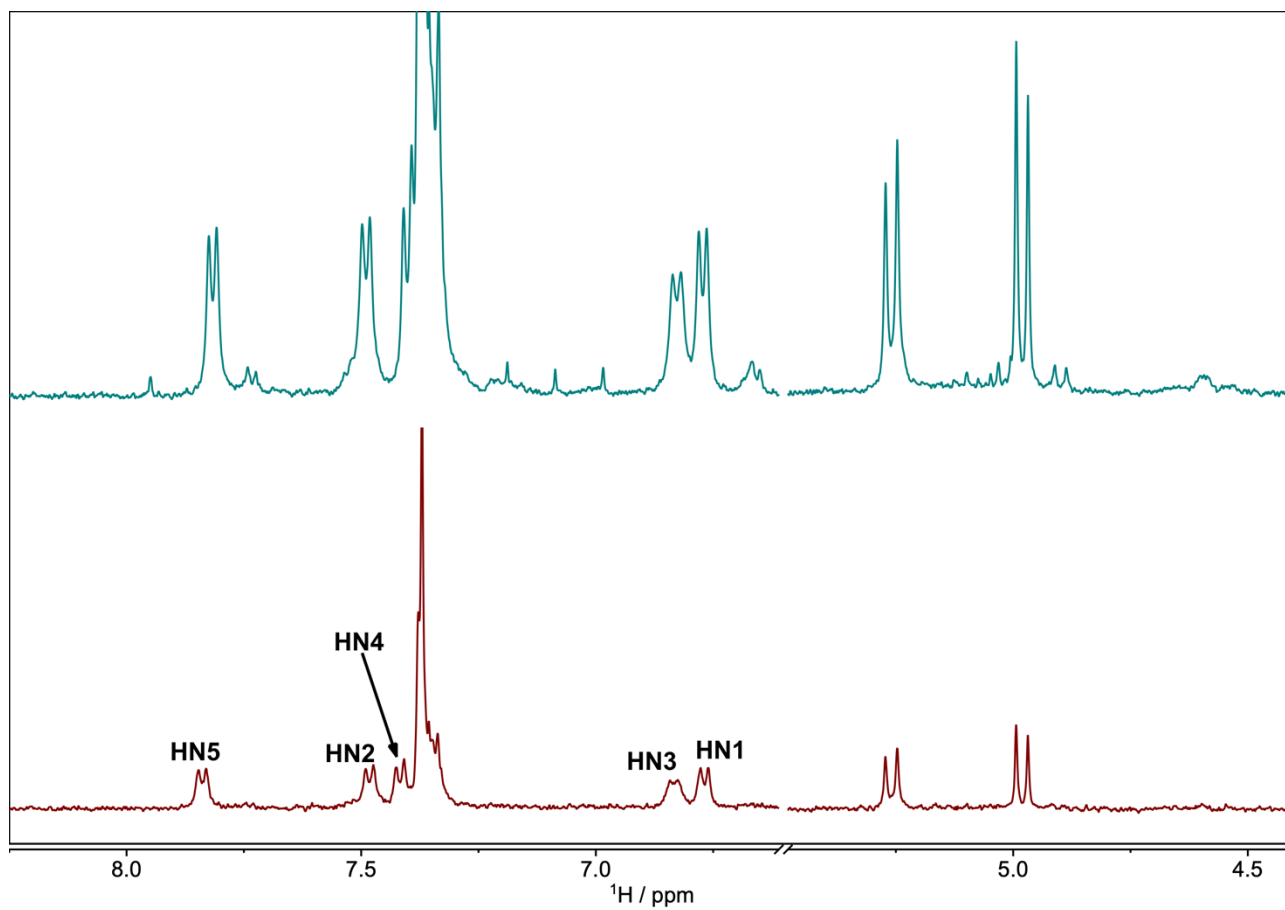

**Figure S20:** <sup>1</sup>H-NMR spectrum of peptide **14** at concentrations of 0.4 mM (bottom) and 1.5 mM (top): expansion of the amide and hydroxyl regions. Conditions: DMSO-*d*<sub>6</sub>, 500 MHz, 298 K.

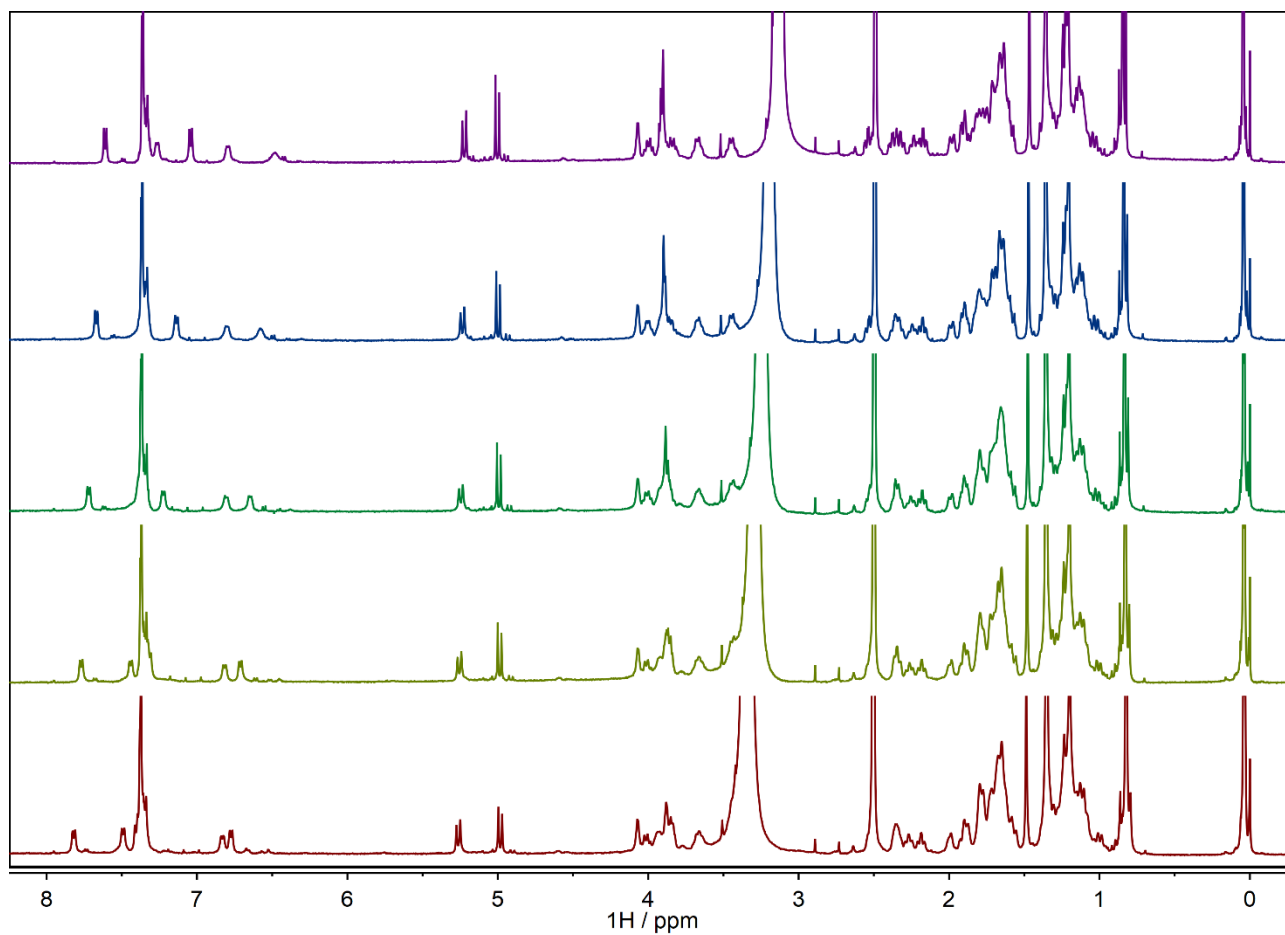

**Figure S21:** VT-NMR spectra of peptide **14** in DMSO-*d*<sub>6</sub> (500 MHz). Temperatures, from bottom to top: 298 to 338 K in 10 K steps.

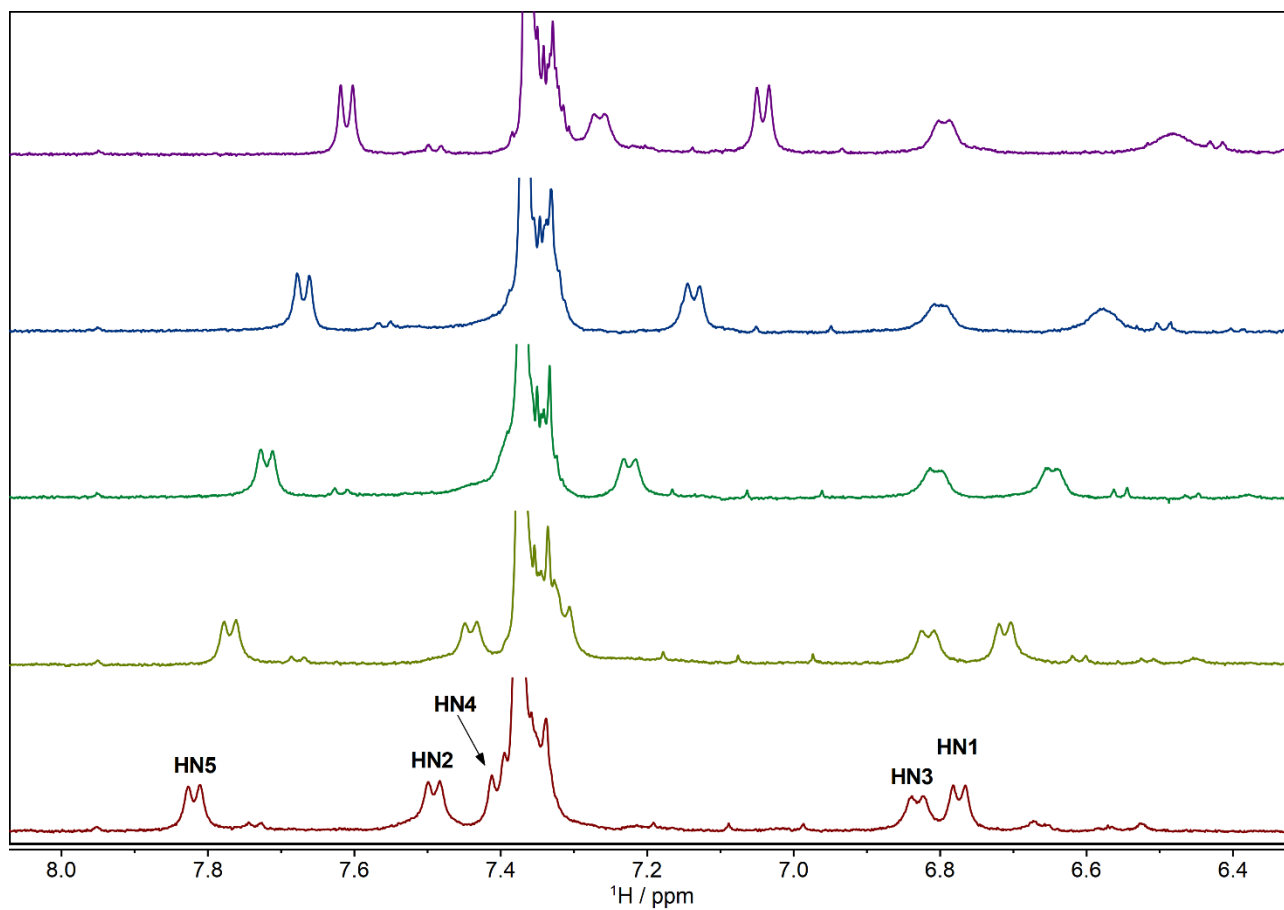

**Figure S22:** Expansion of the amide proton region of the VT-NMR spectra of peptide **14** in  $\text{DMSO-}d_6$  (500 MHz). Temperatures, from bottom to top: 298 to 338 K in 10 K steps.

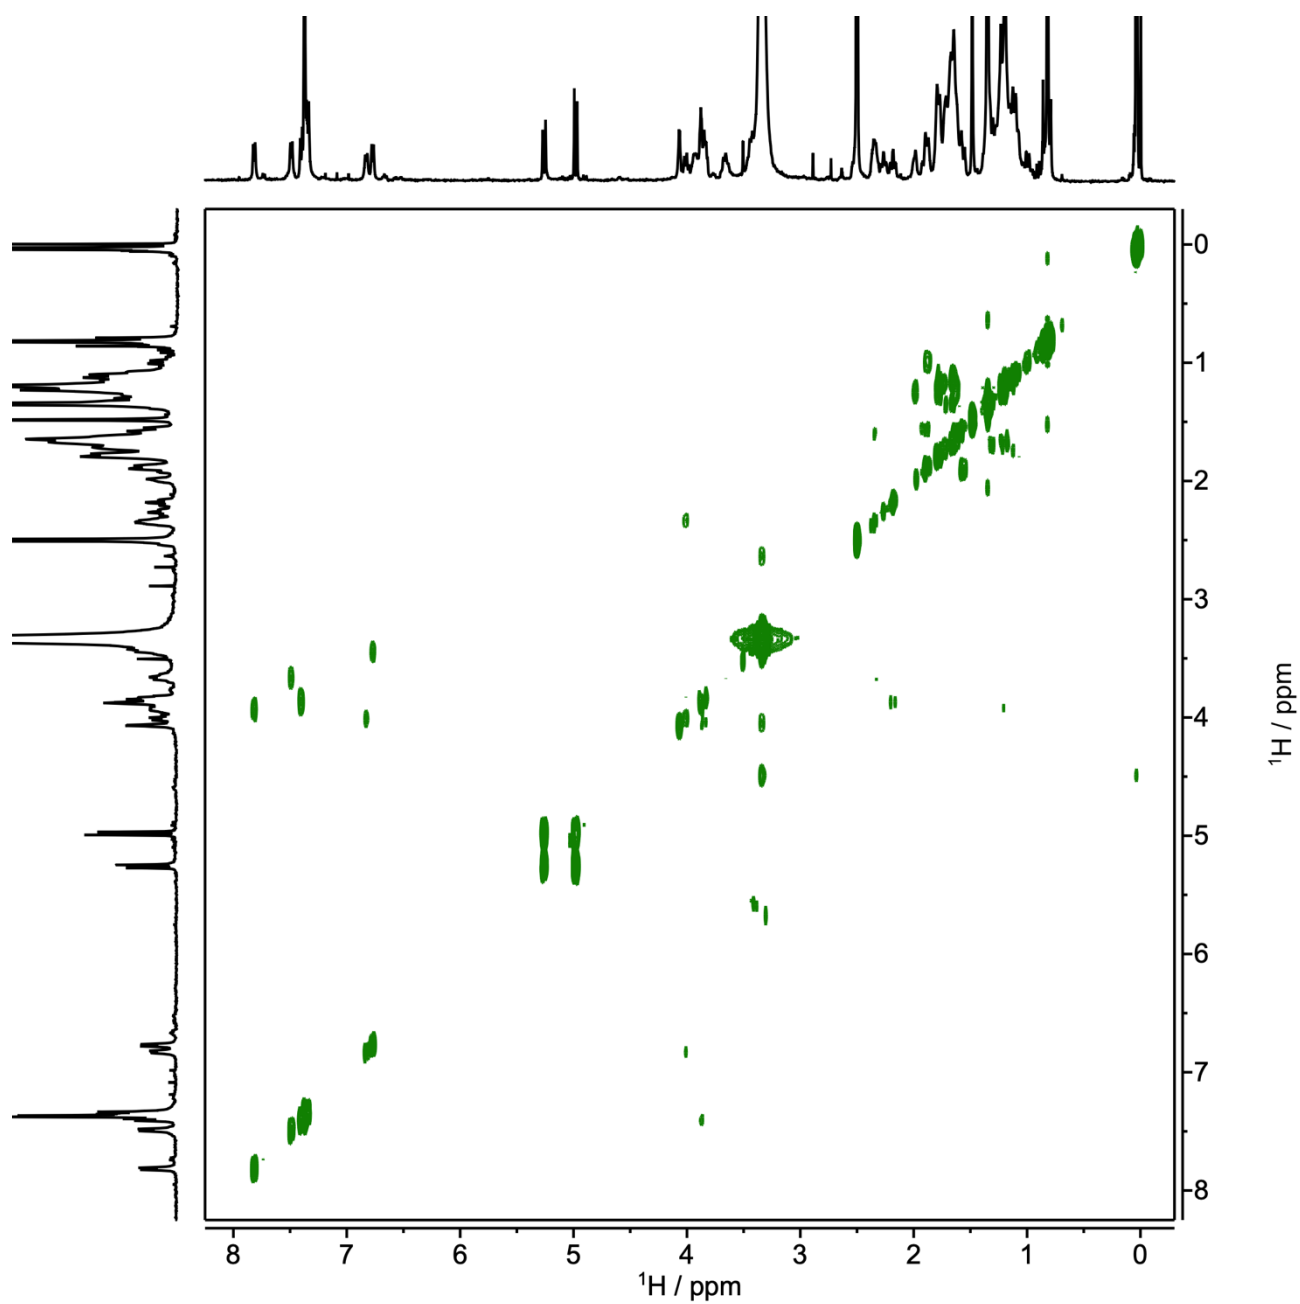

**Figure S23:** COSY spectrum of peptide **14** (DMSO- $d_6$ , 500 MHz, 298 K).





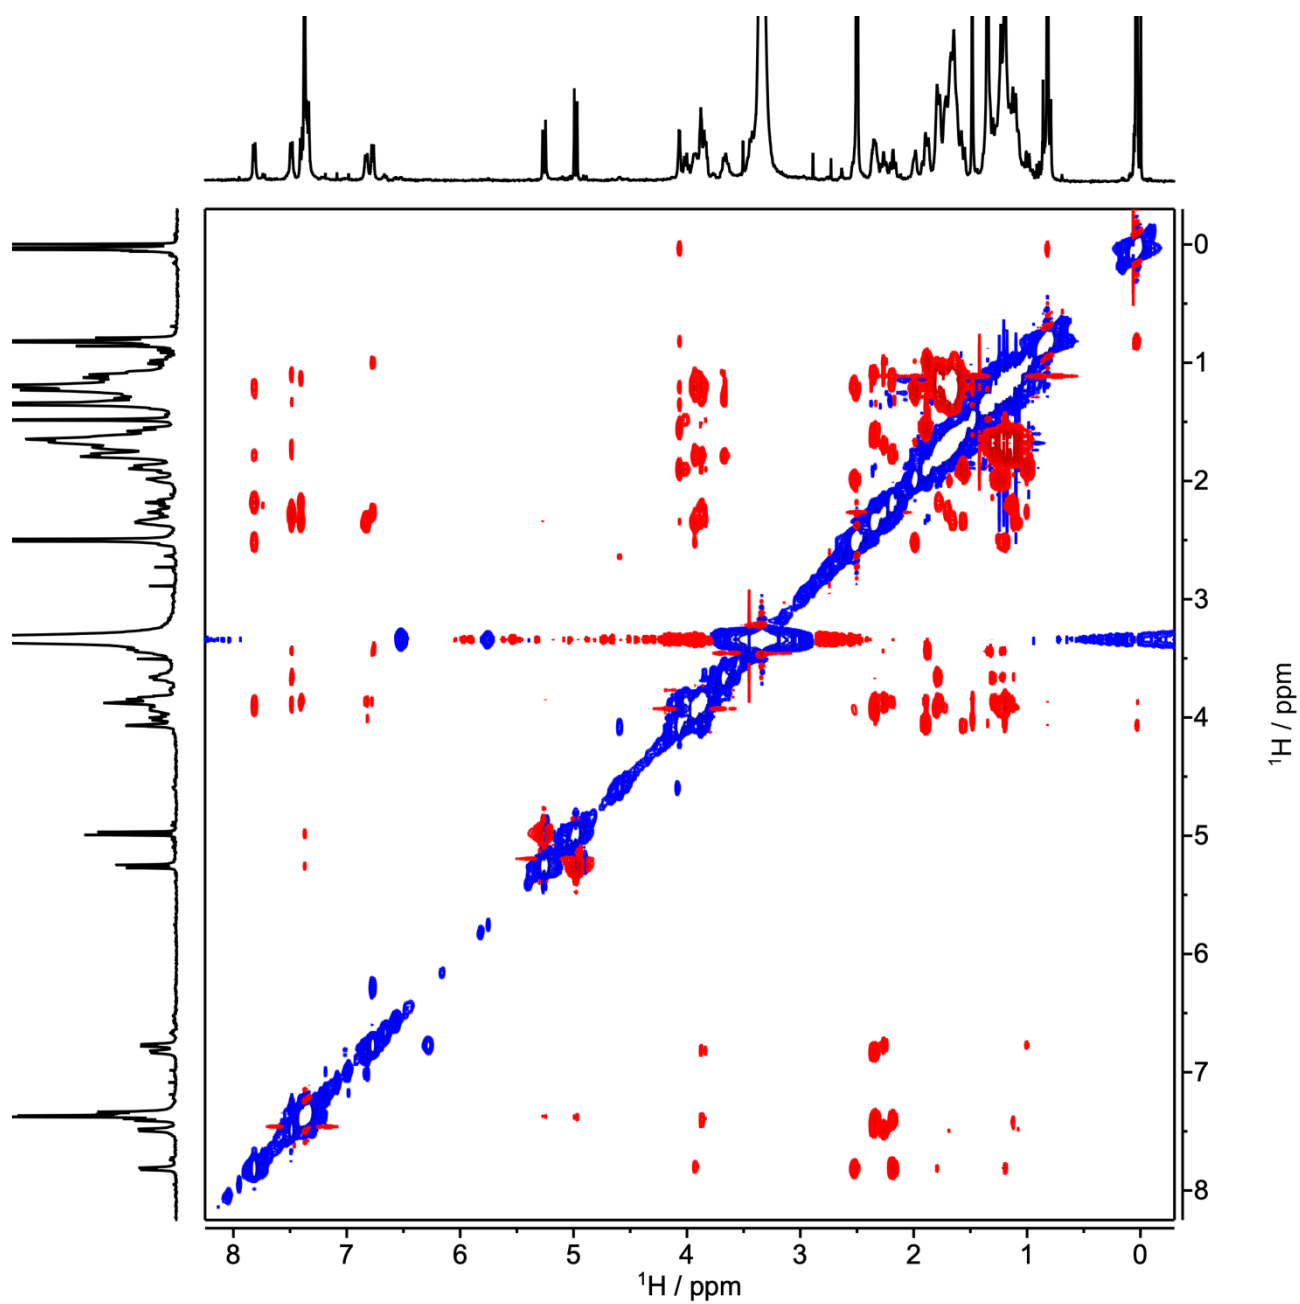

**Figure S25:** ROESY spectrum of peptide **14**,  $t_{\text{mix}} = 120$  ms (DMSO- $d_6$ , 500 MHz, 298 K).

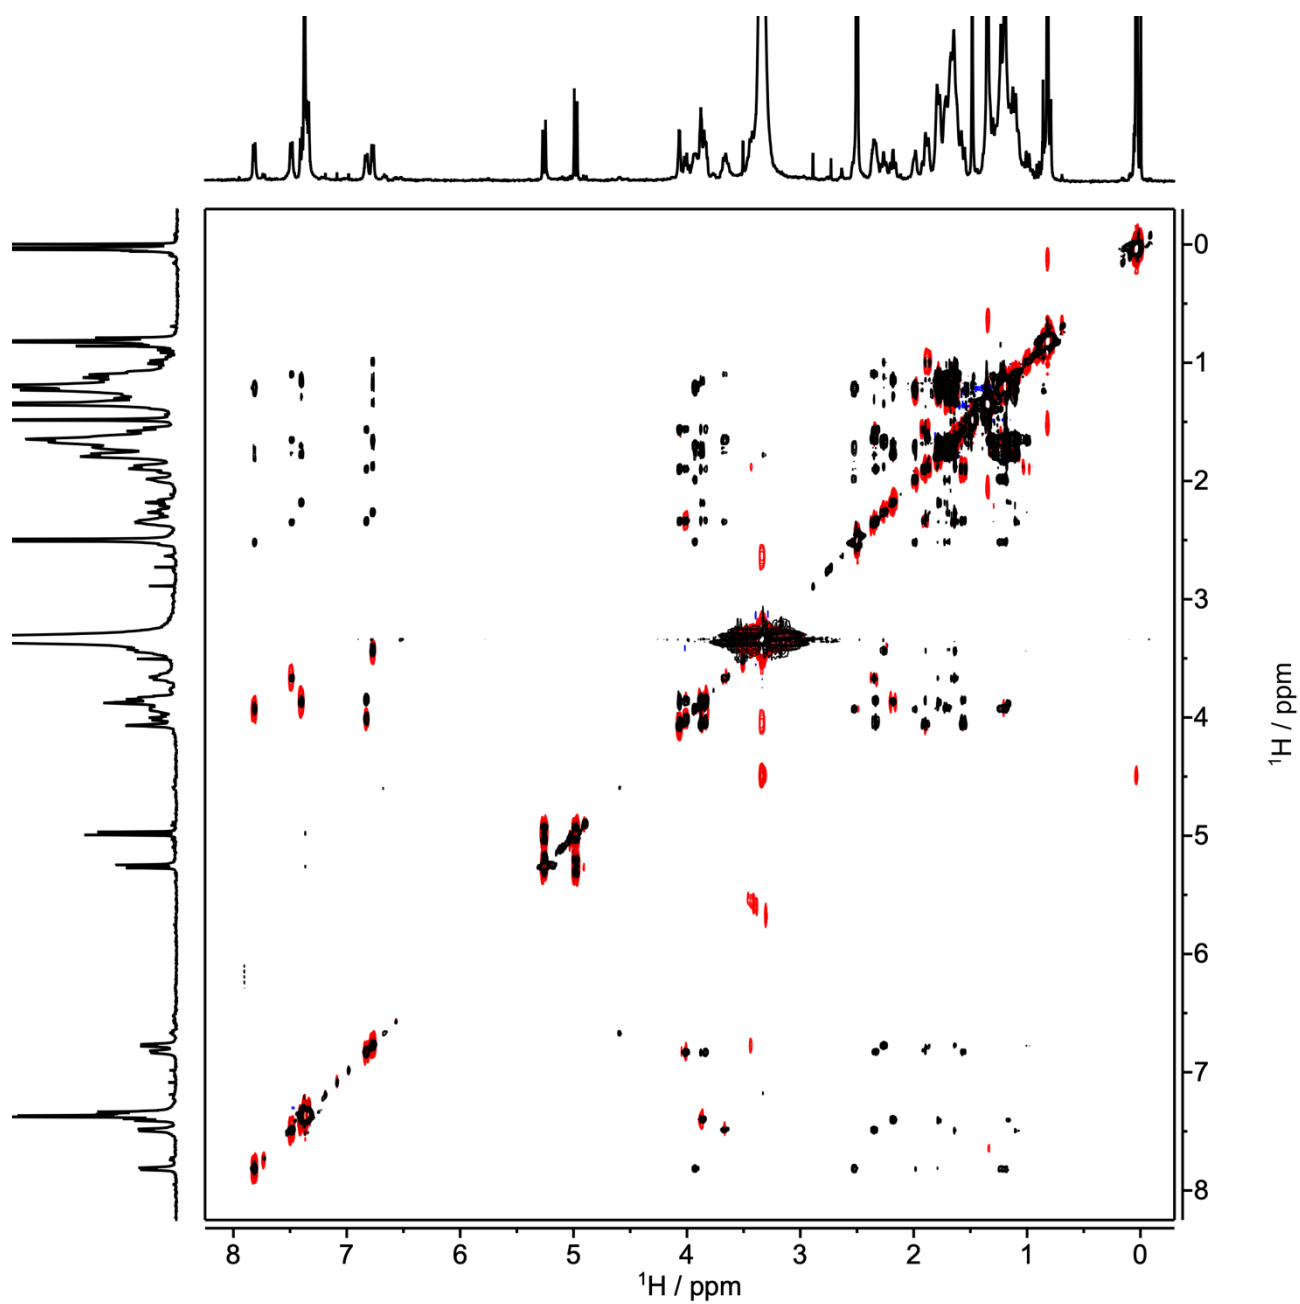

**Figure S26:** Overlay of the COSY (*red*) and TOCSY (*black*,  $t_{\text{mix}}$  70 ms) spectra of peptide **14** (DMSO- $d_6$ , 500 MHz, 298 K).

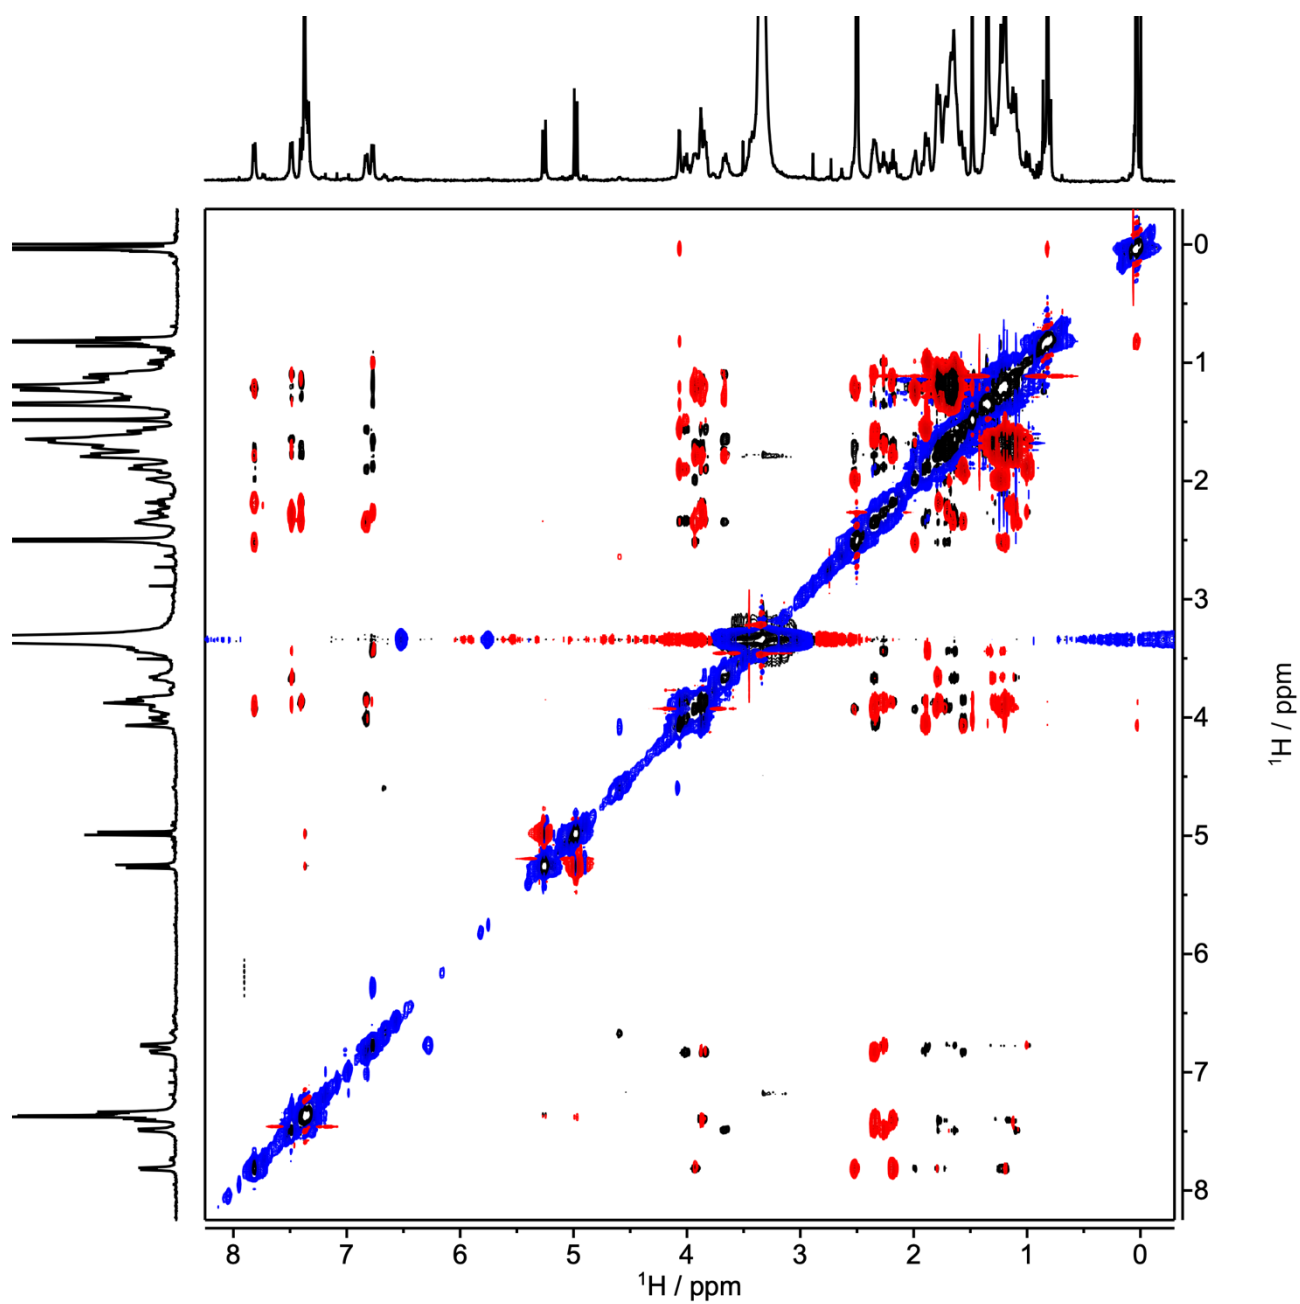

**Figure S27:** Overlay of the ROESY (red/blue,  $t_{\text{mix}}$  120 ms) and TOCSY (black,  $t_{\text{mix}}$  70 ms) spectra of peptide **14** (DMSO- $d_6$ , 500 MHz, 298 K).

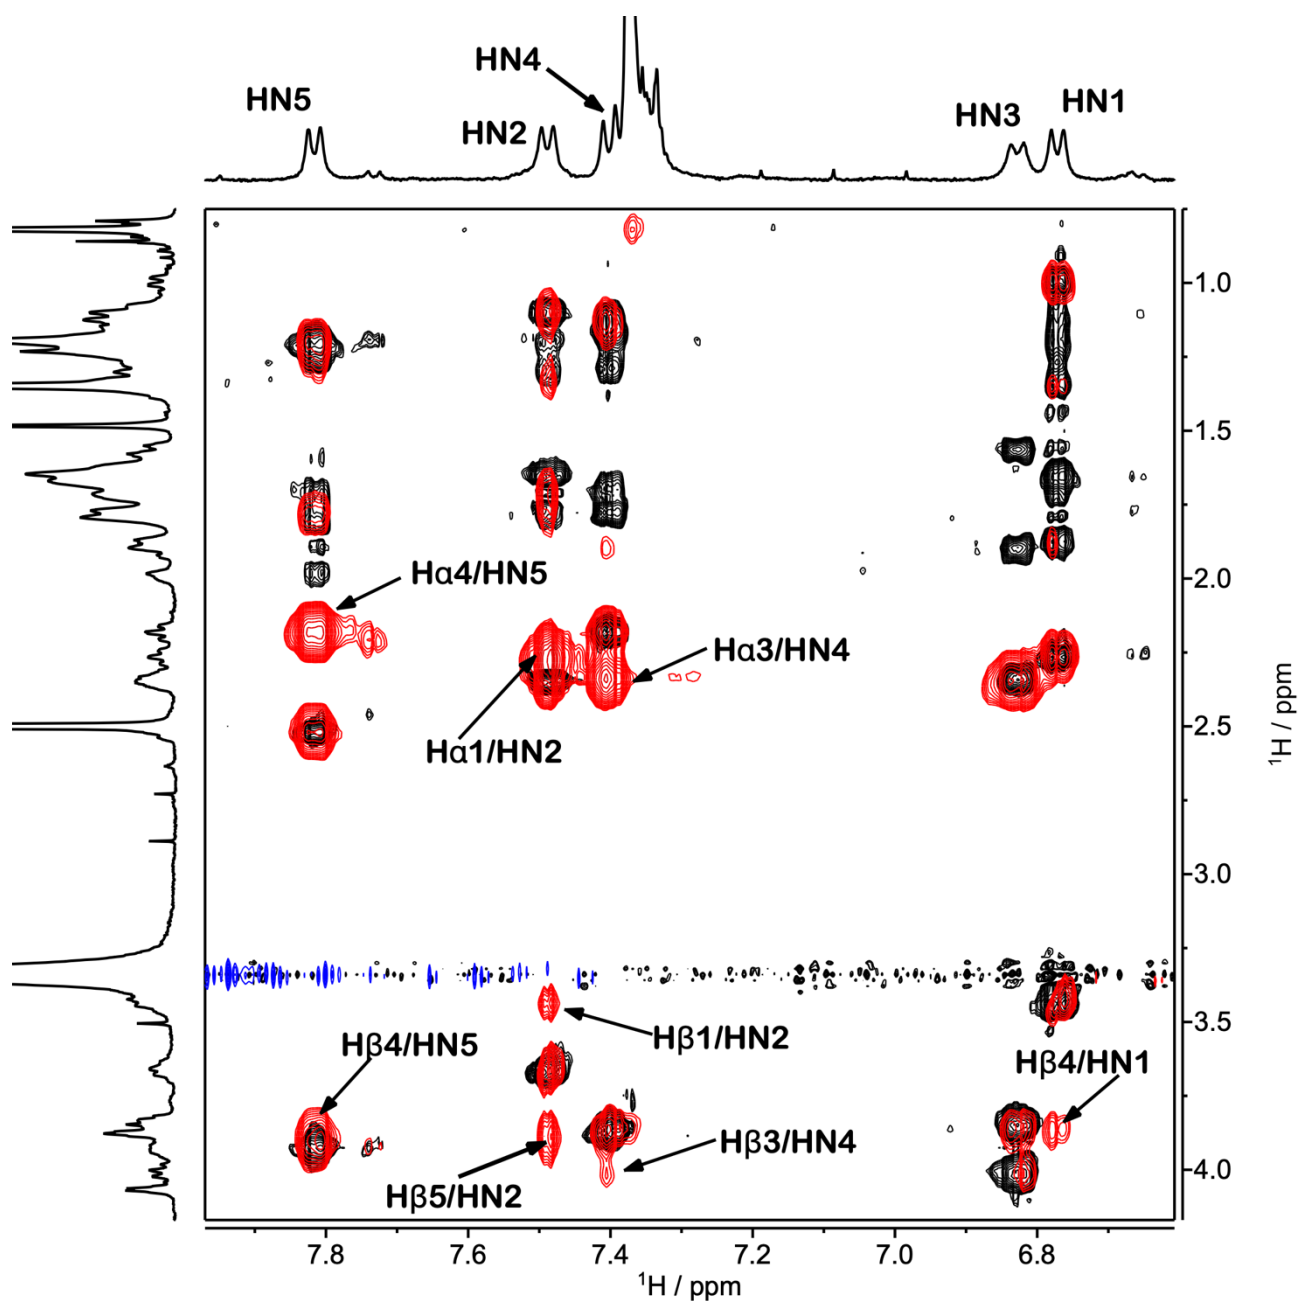

**Figure S28:** Overlay of the ROESY (red/blue,  $t_{mix}$  120 ms) and TOCSY (black,  $t_{mix}$  70 ms) spectra of peptide **14** (DMSO- $d_6$ , 500 MHz, 298 K). Expansion of the  $(H\alpha+H\beta)/HN$  region.

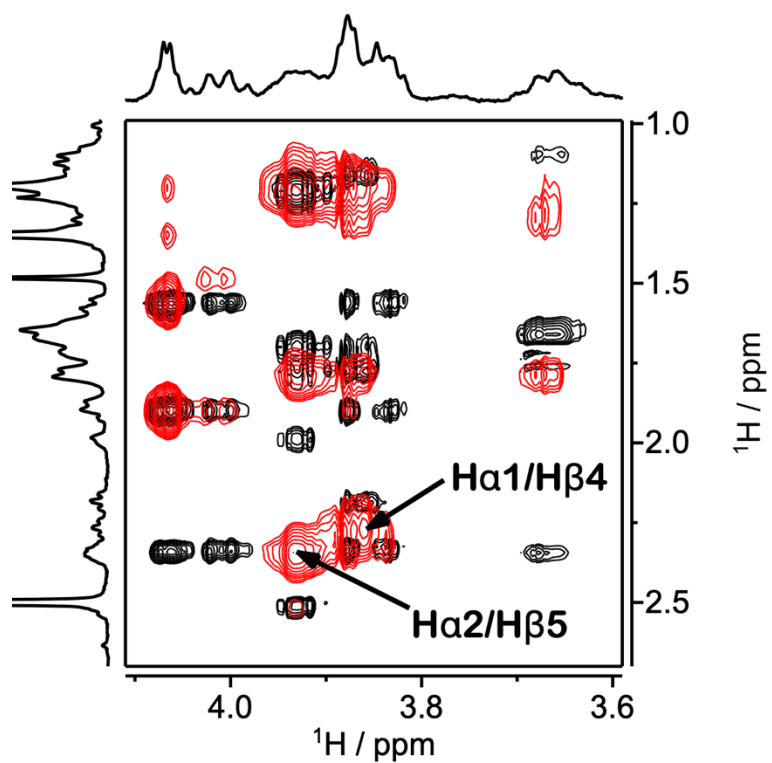

**Figure S29:** Overlay of the ROESY (red/blue,  $t_{\text{mix}}$  120 ms) and TOCSY (black,  $t_{\text{mix}}$  70 ms) spectra of peptide **14** (DMSO- $d_6$ , 500 MHz, 298 K). Expansion of the Ha/Hβ region.

V-B. Peptide 15: NMR spectroscopy in DMSO- $d_6$

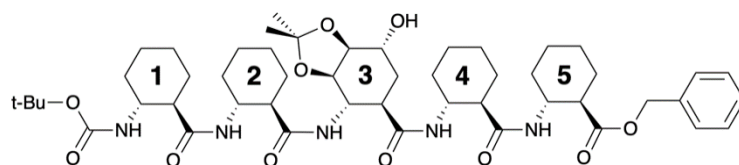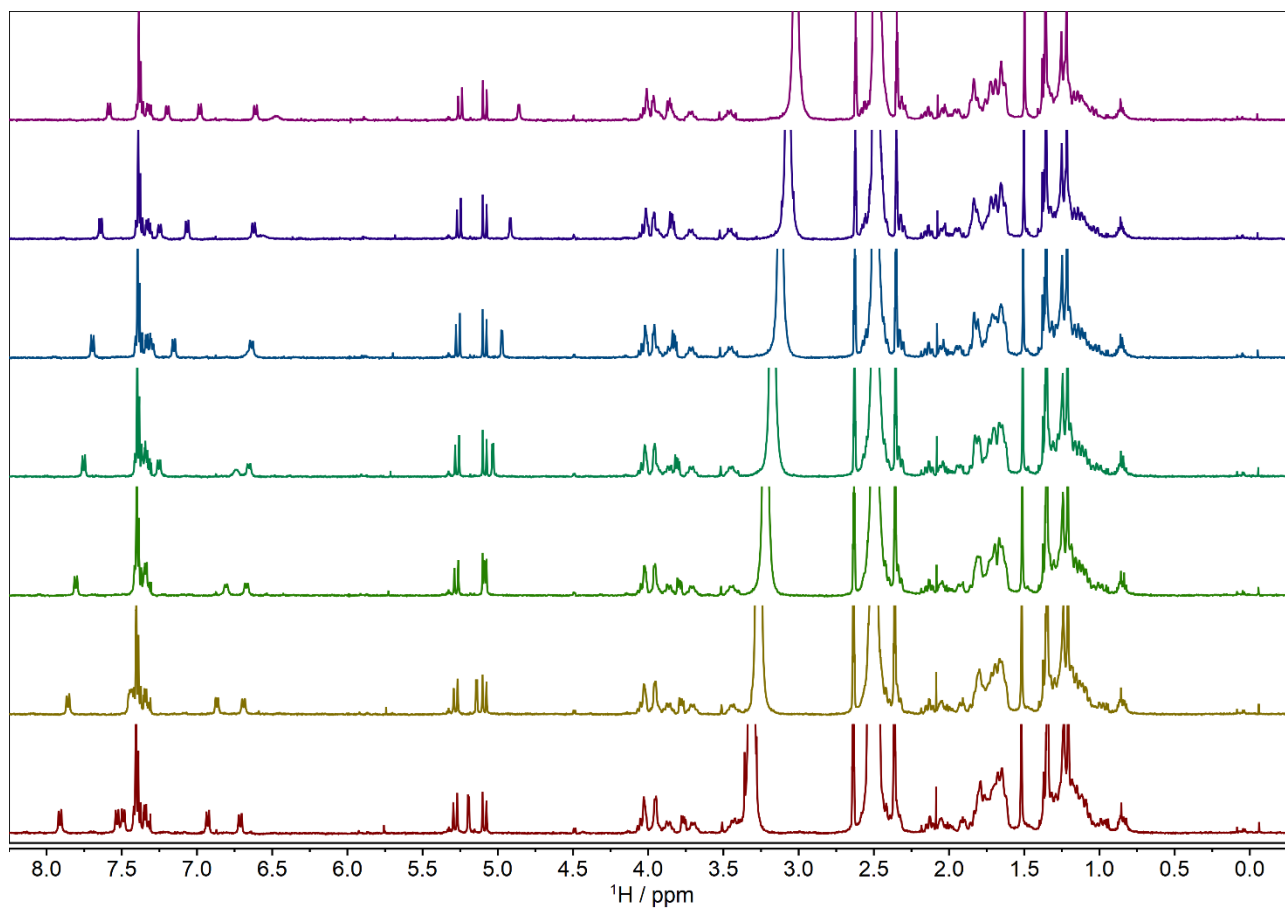

**Figure S30:** VT-NMR spectra of peptide **15** in DMSO- $d_6$  (500 MHz). Temperatures, from bottom to top: 298 to 358 K in 10 K steps.

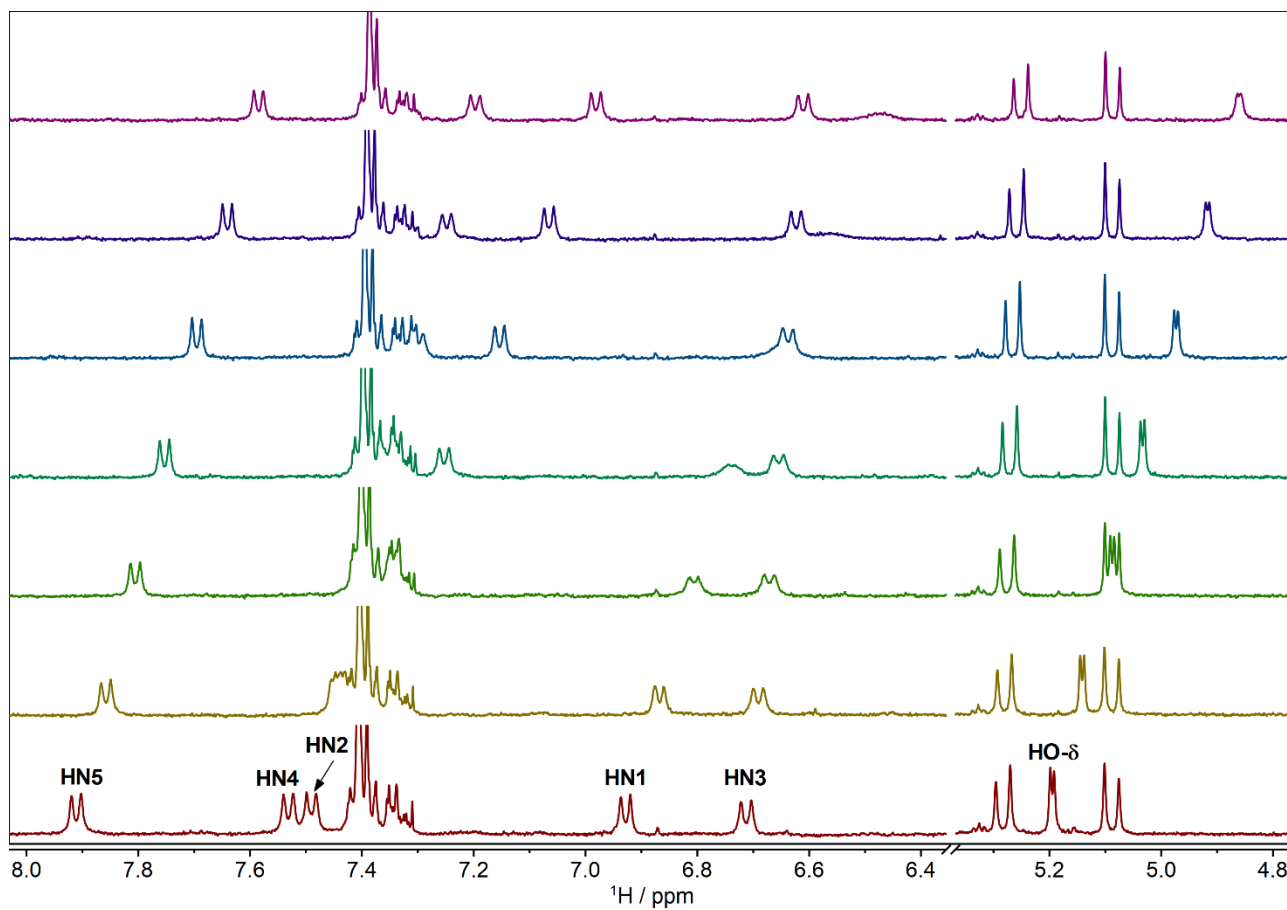

**Figure S31:** Expansion of the amide proton region of the VT-NMR spectra of peptide **15** in  $\text{DMSO-}d_6$  (500 MHz). Temperatures, from bottom to top: 298 to 358 K in 10 K steps.



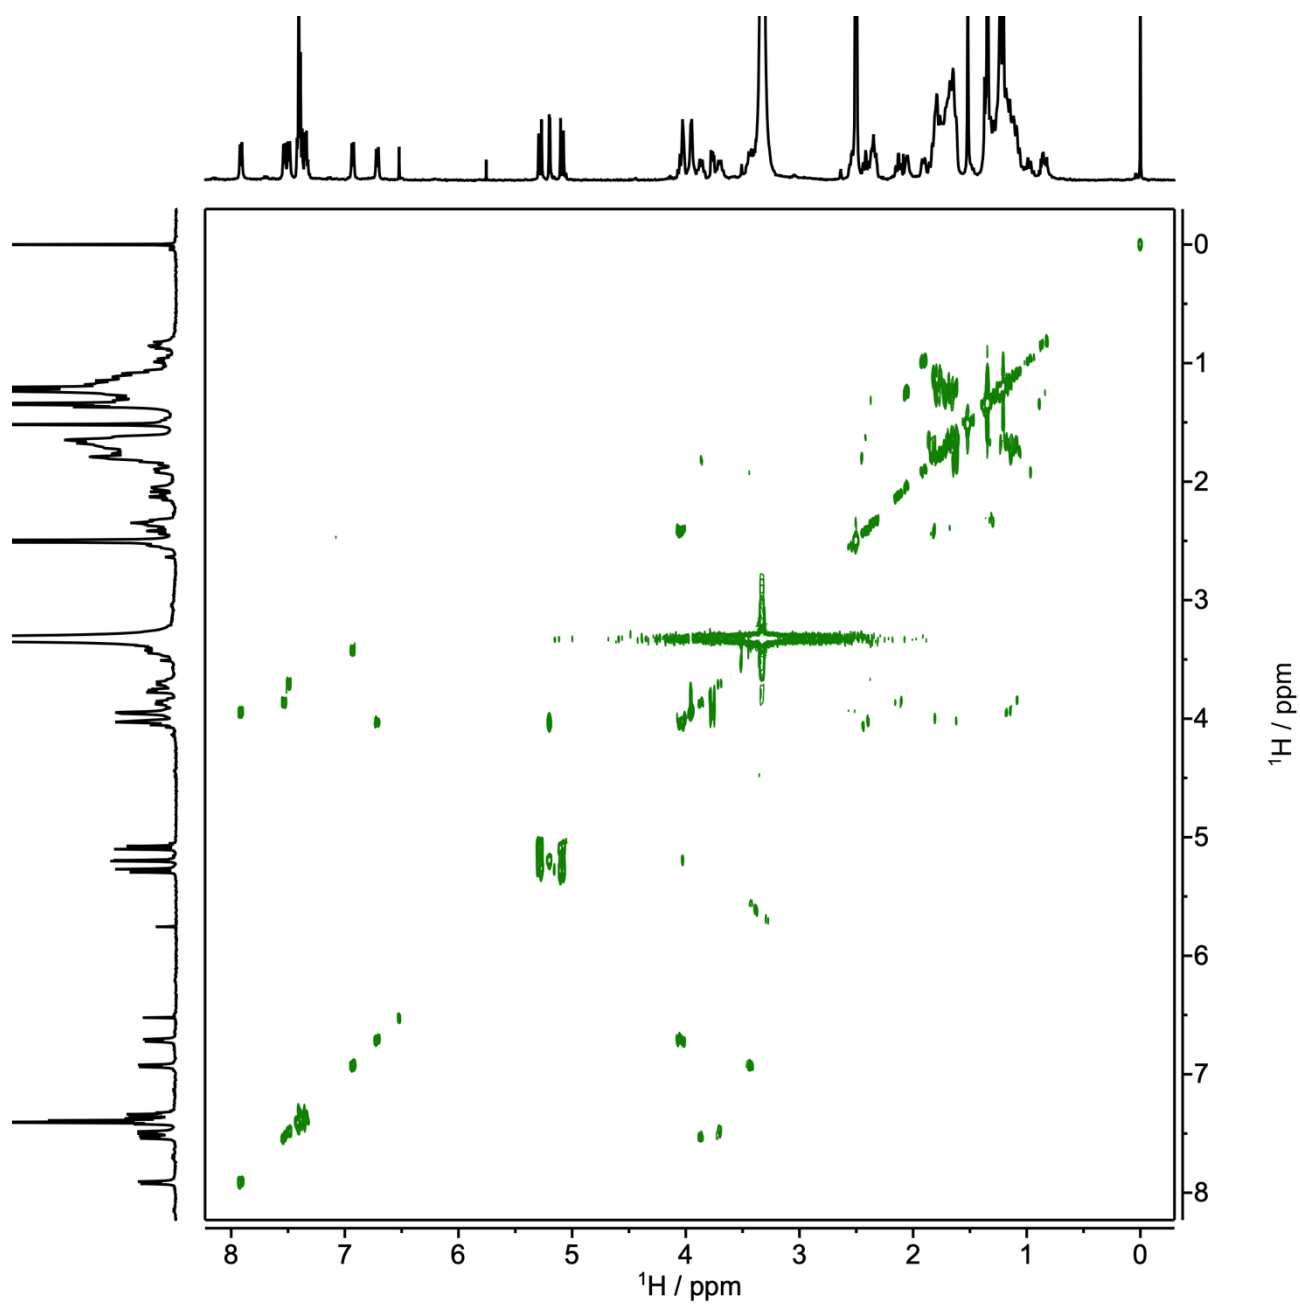

**Figure S32:** COSY spectrum of peptide **15** (DMSO- $d_6$ , 500 MHz, 298 K).

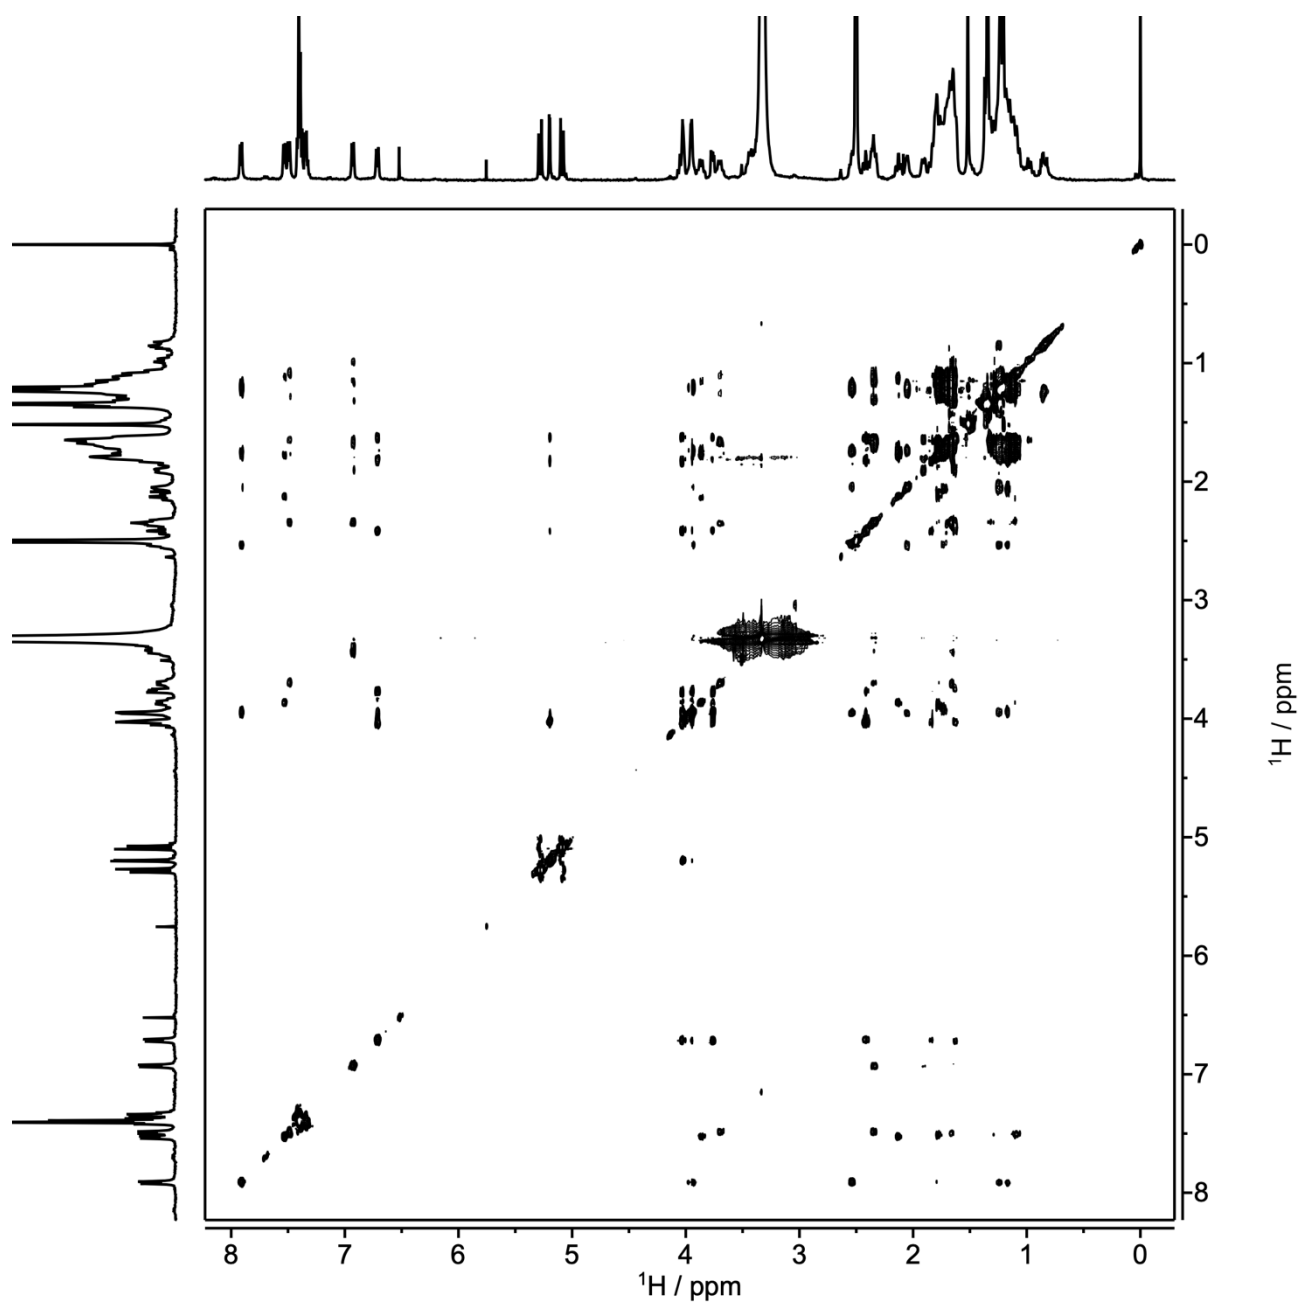

**Figure S33:** TOCSY spectrum of peptide **15**,  $t_{\text{mix}} = 70$  ms (DMSO- $d_6$ , 500 MHz, 298 K).

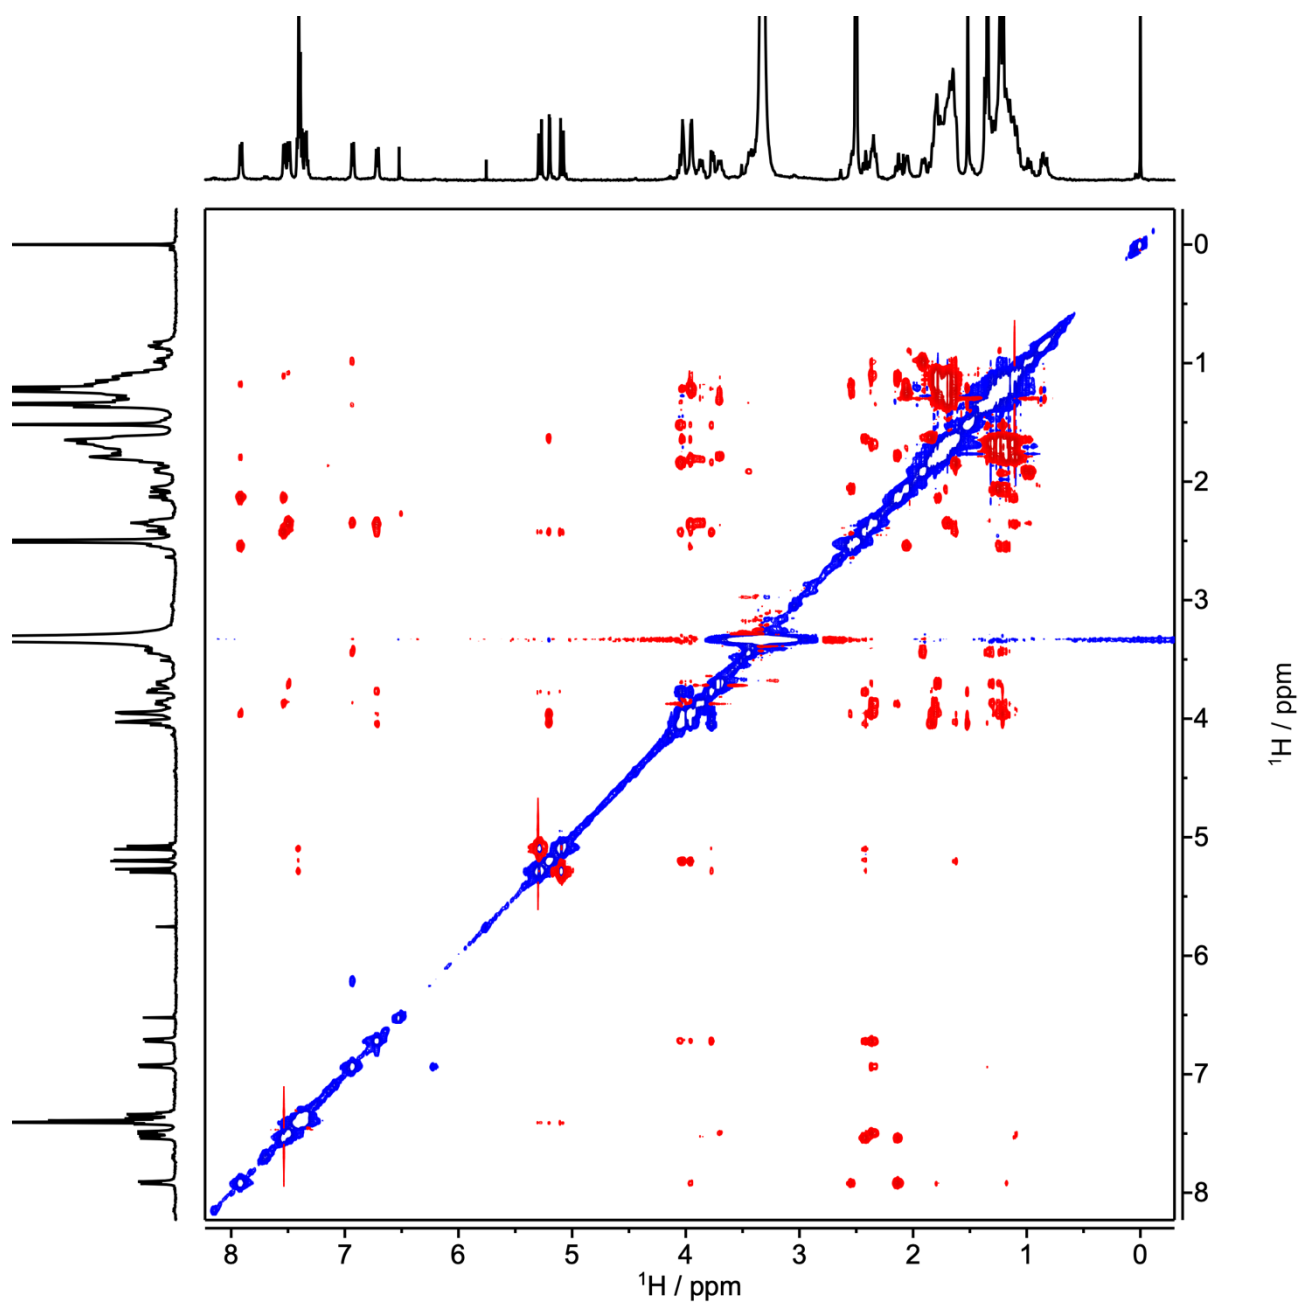

**Figure S34:** ROESY spectrum of peptide **15**,  $t_{\text{mix}} = 200$  ms (DMSO- $d_6$ , 500 MHz, 298 K).

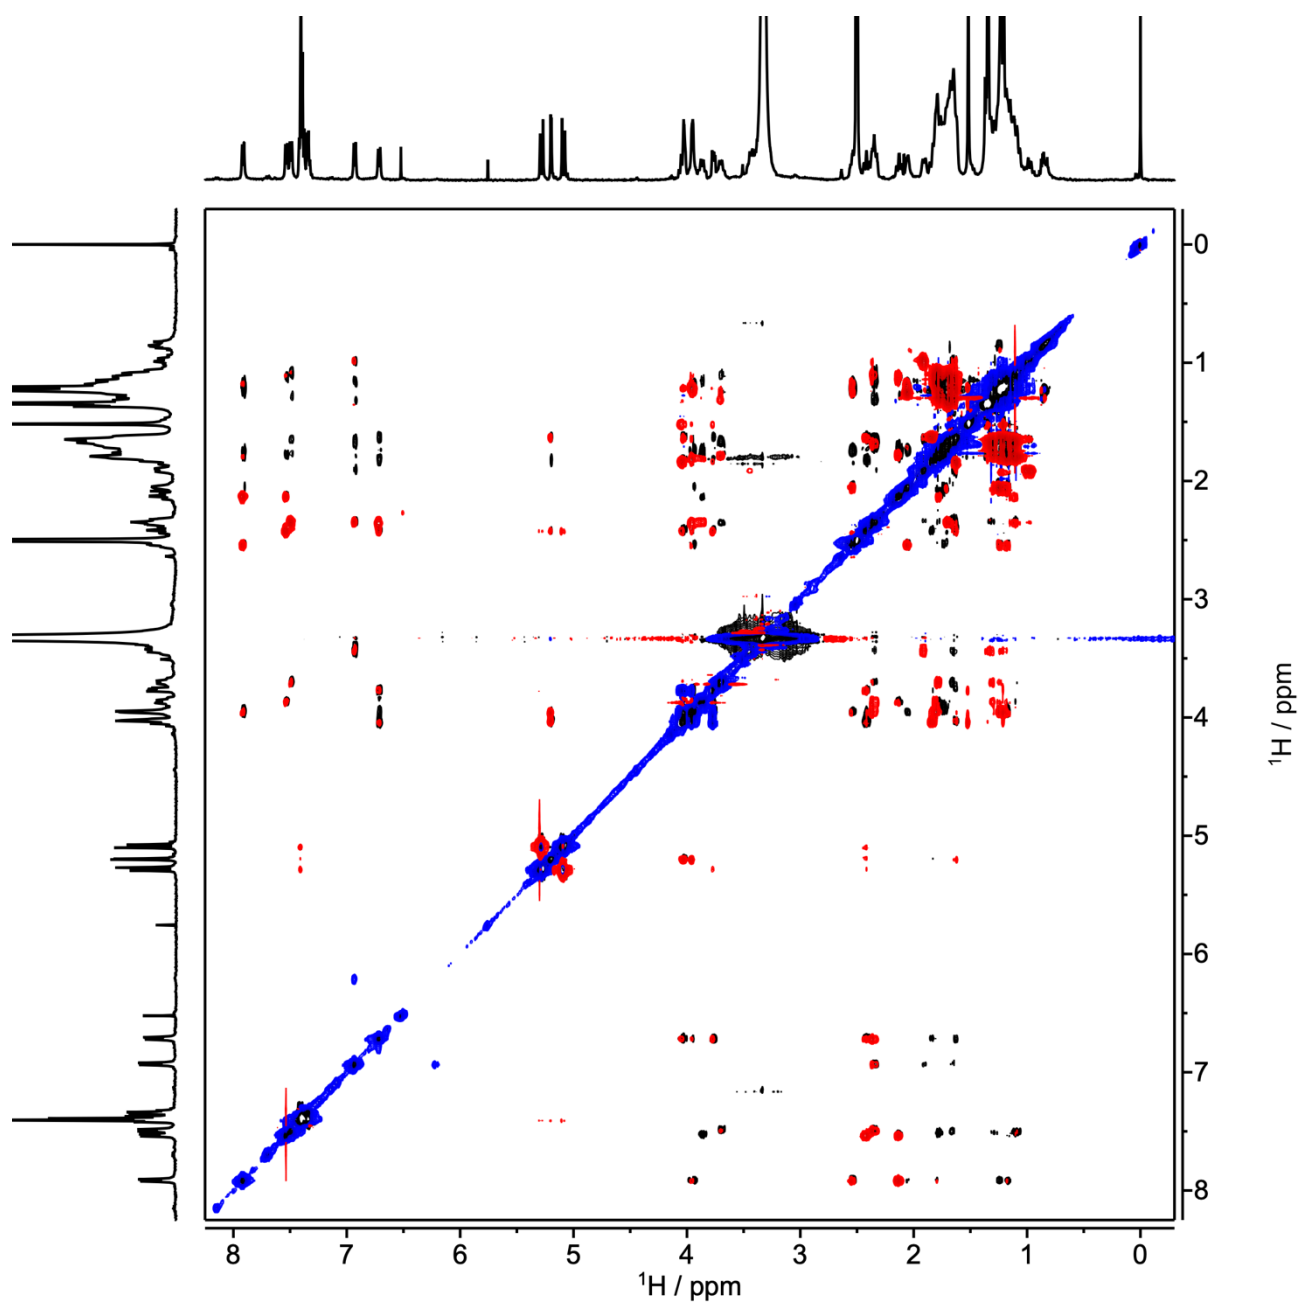

**Figure S35:** Overlay of the ROESY (red/blue,  $t_{\text{mix}}$  200 ms) and TOCSY (black,  $t_{\text{mix}}$  70 ms) spectra of peptide **15** (DMSO- $d_6$ , 500 MHz, 298 K).

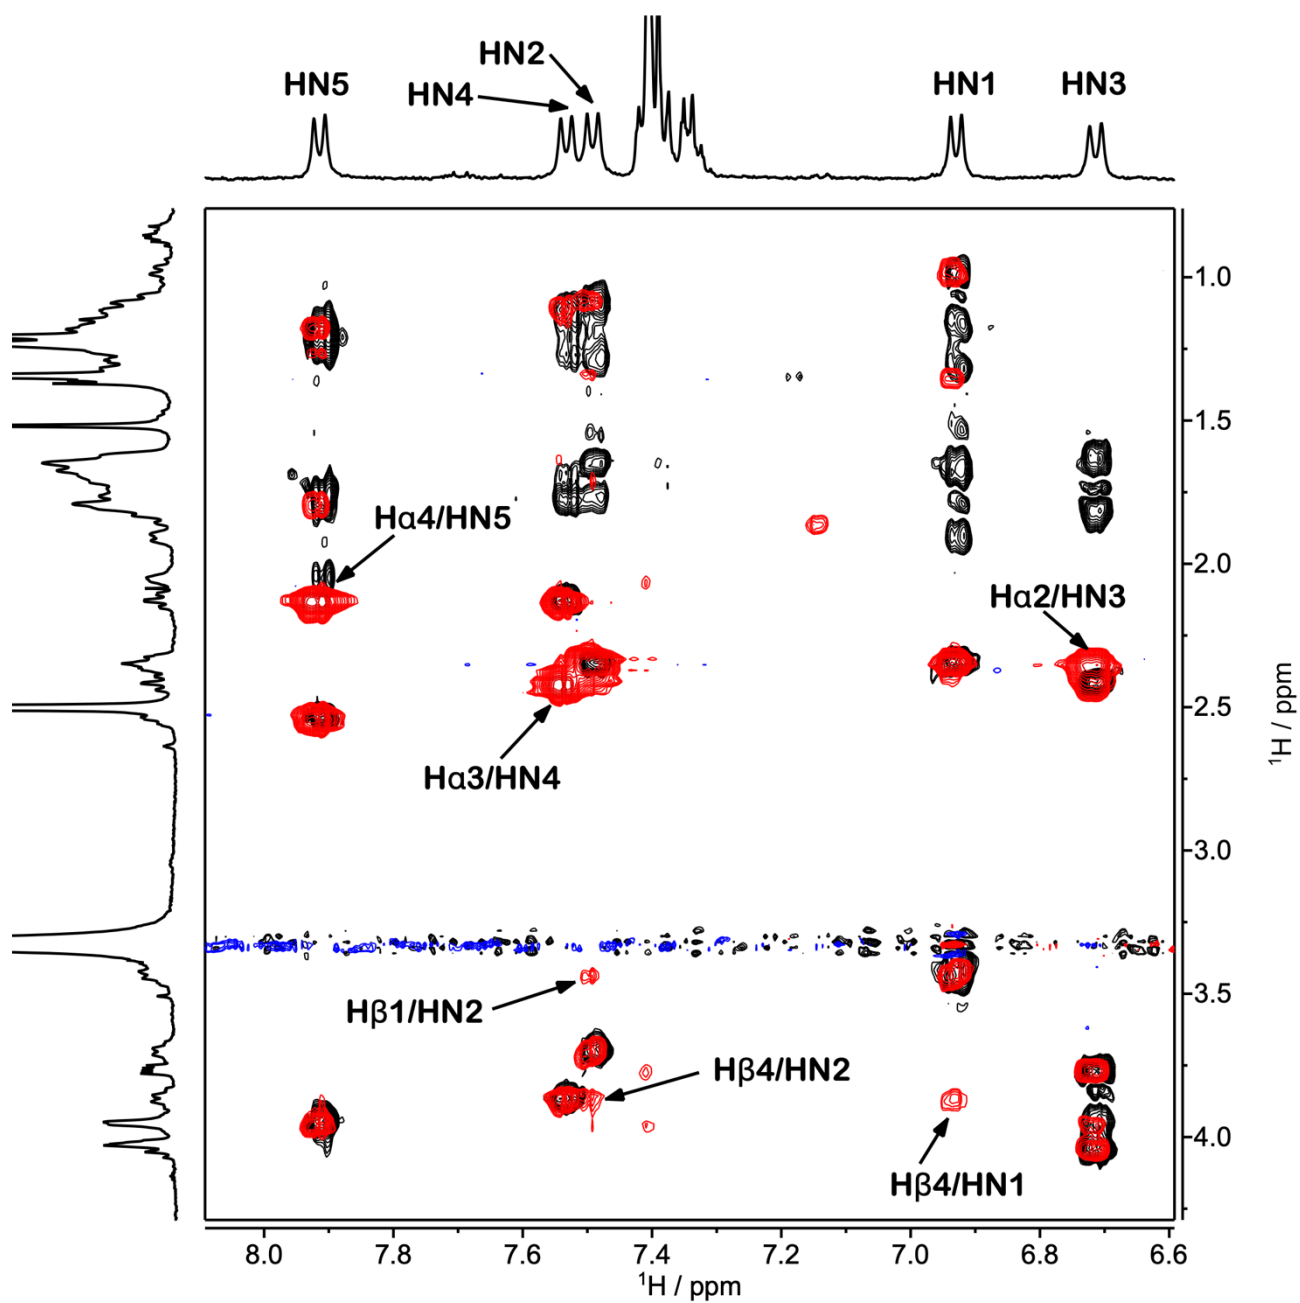

**Figure S36:** Overlay of the ROESY (red/blue,  $t_{\text{mix}}$  200 ms) and TOCSY (black,  $t_{\text{mix}}$  70 ms) spectra of peptide 15 (DMSO- $d_6$ , 500 MHz, 298 K). Expansion of the (H $\alpha$ +H $\beta$ )/HN region.

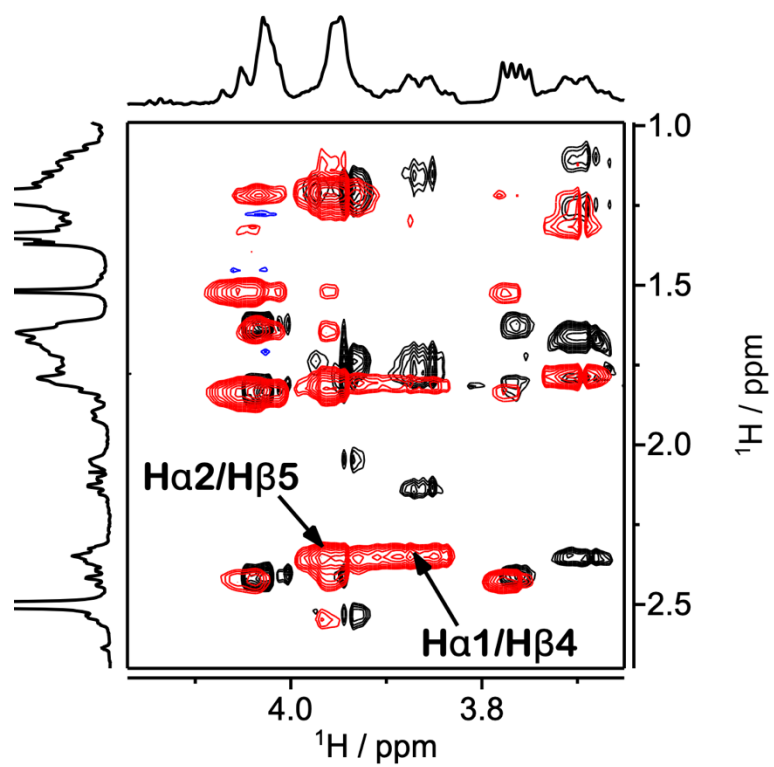

**Figure S37:** Overlay of the ROESY (red/blue,  $t_{\text{mix}}$  200 ms) and TOCSY (black,  $t_{\text{mix}}$  70 ms) spectra of peptide **15** (DMSO- $d_6$ , 500 MHz, 298 K). Expansion of the  $\text{Ha}/\text{H}\beta$  region.

V-C. Peptide 16: NMR spectroscopy in DMSO- $d_6$

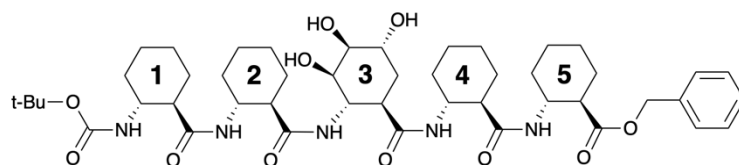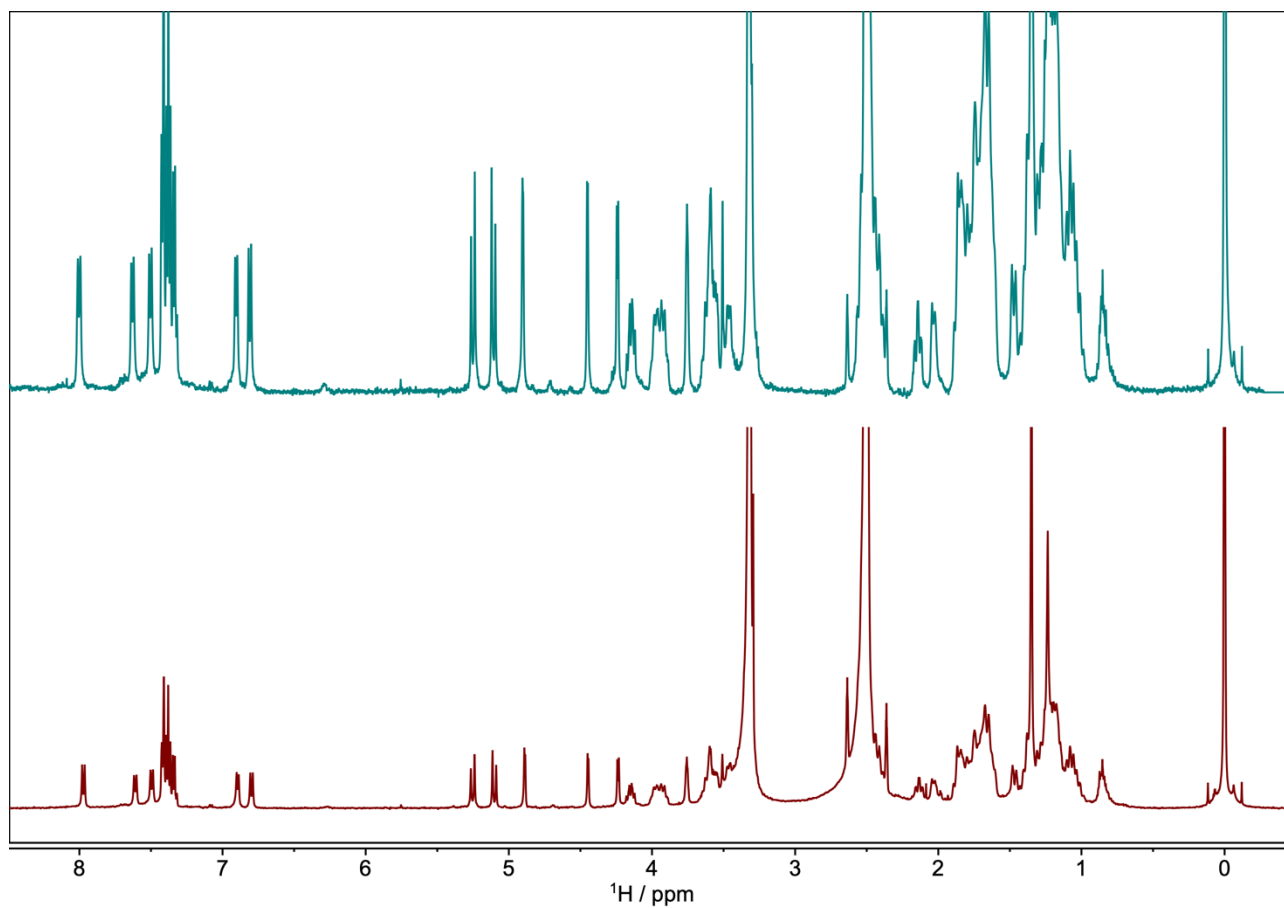

**Figure S38:**  $^1\text{H}$ -NMR spectrum of peptide **16** at concentrations of 1.8 mM (bottom) and 10 mM (top). Conditions: DMSO- $d_6$ , 500 MHz, 298 K.

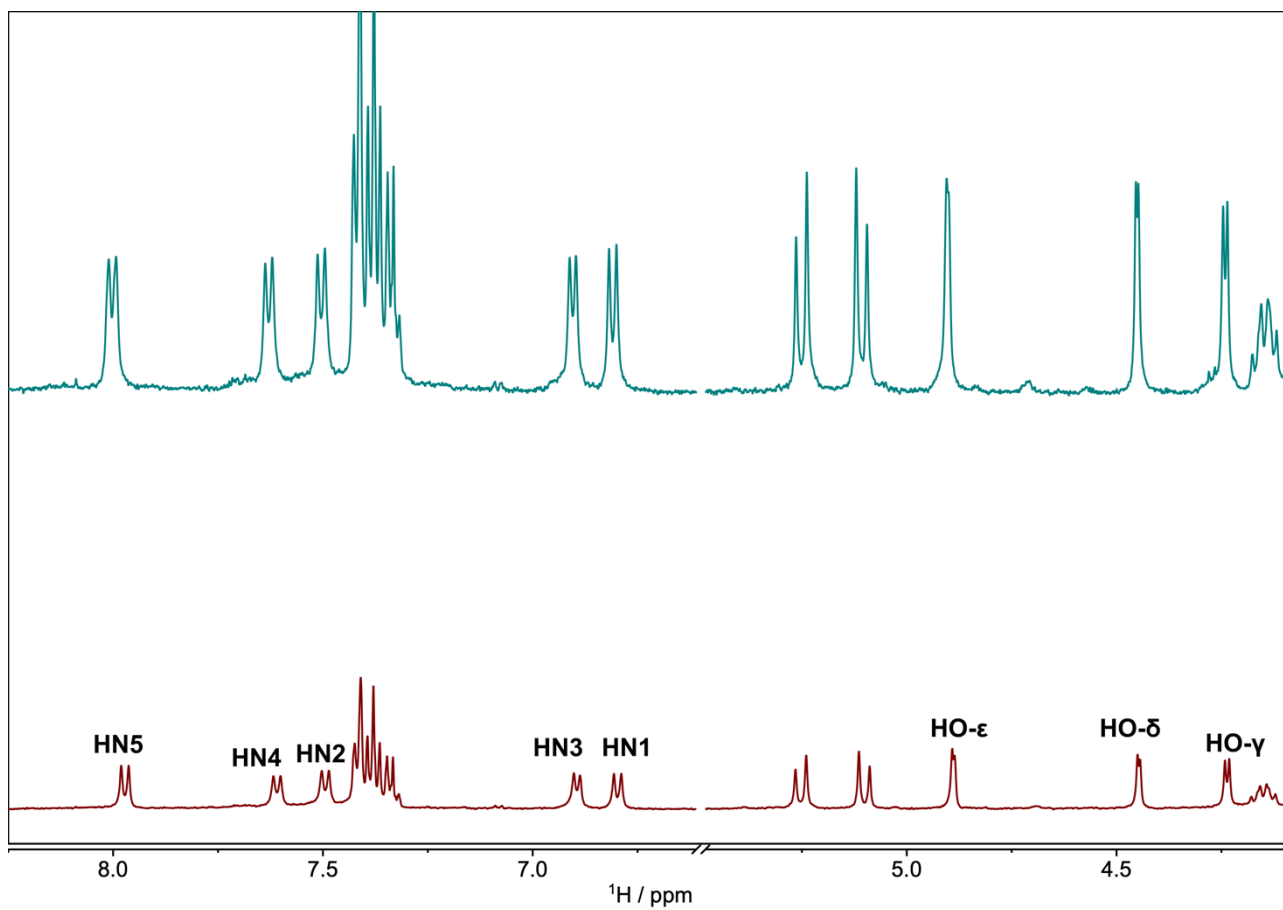

**Figure S39:** <sup>1</sup>H-NMR spectrum of peptide **16** at concentrations of 1.8 mM (bottom) and 10 mM (top): expansion of the amide and hydroxyl regions. Conditions: DMSO-*d*<sub>6</sub>, 500 MHz, 298 K.



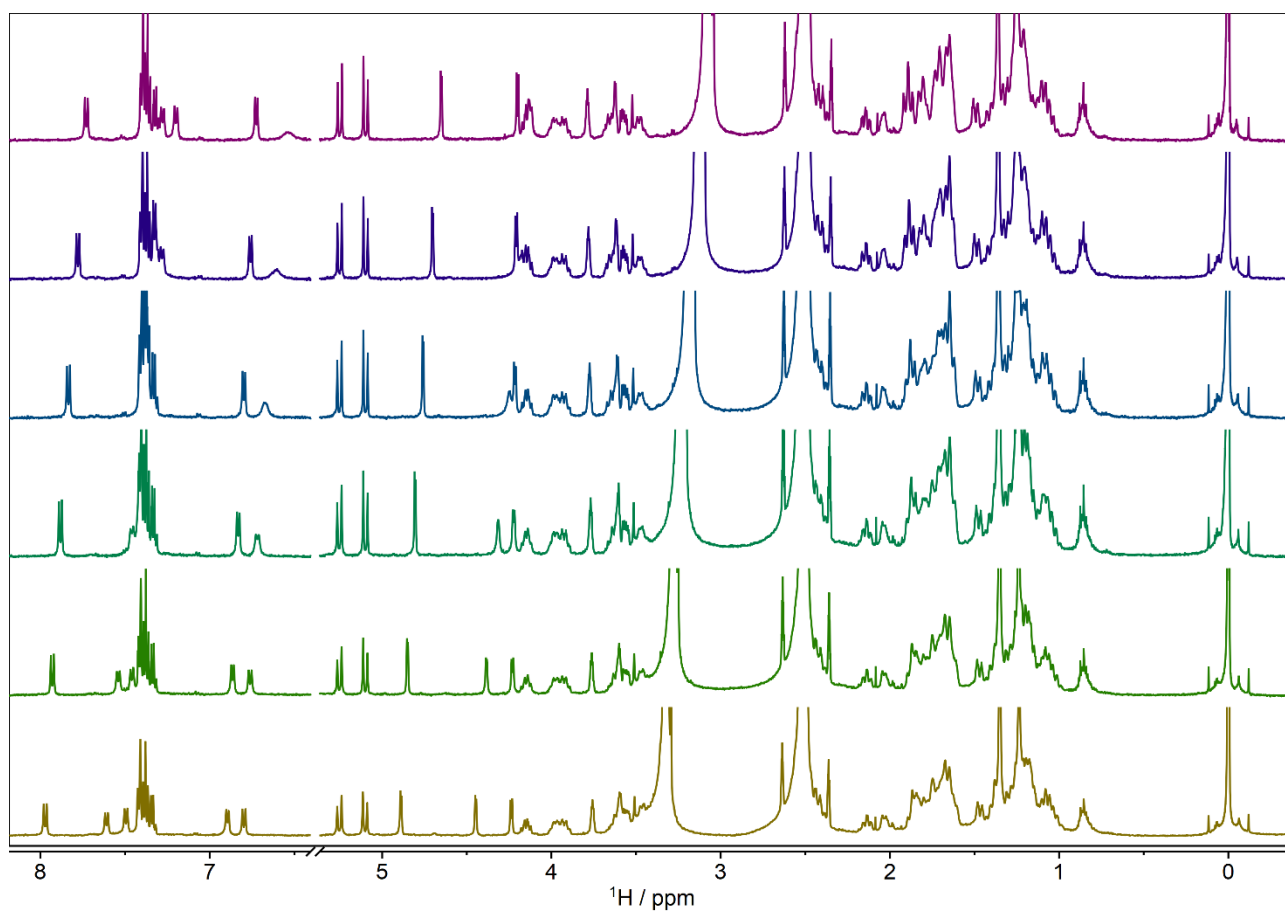

**Figure S40:** VT-NMR spectra of peptide **16** in DMSO-*d*<sub>6</sub> (500 MHz). Temperatures, from bottom to top: 298 to 348 K in 10 K steps.

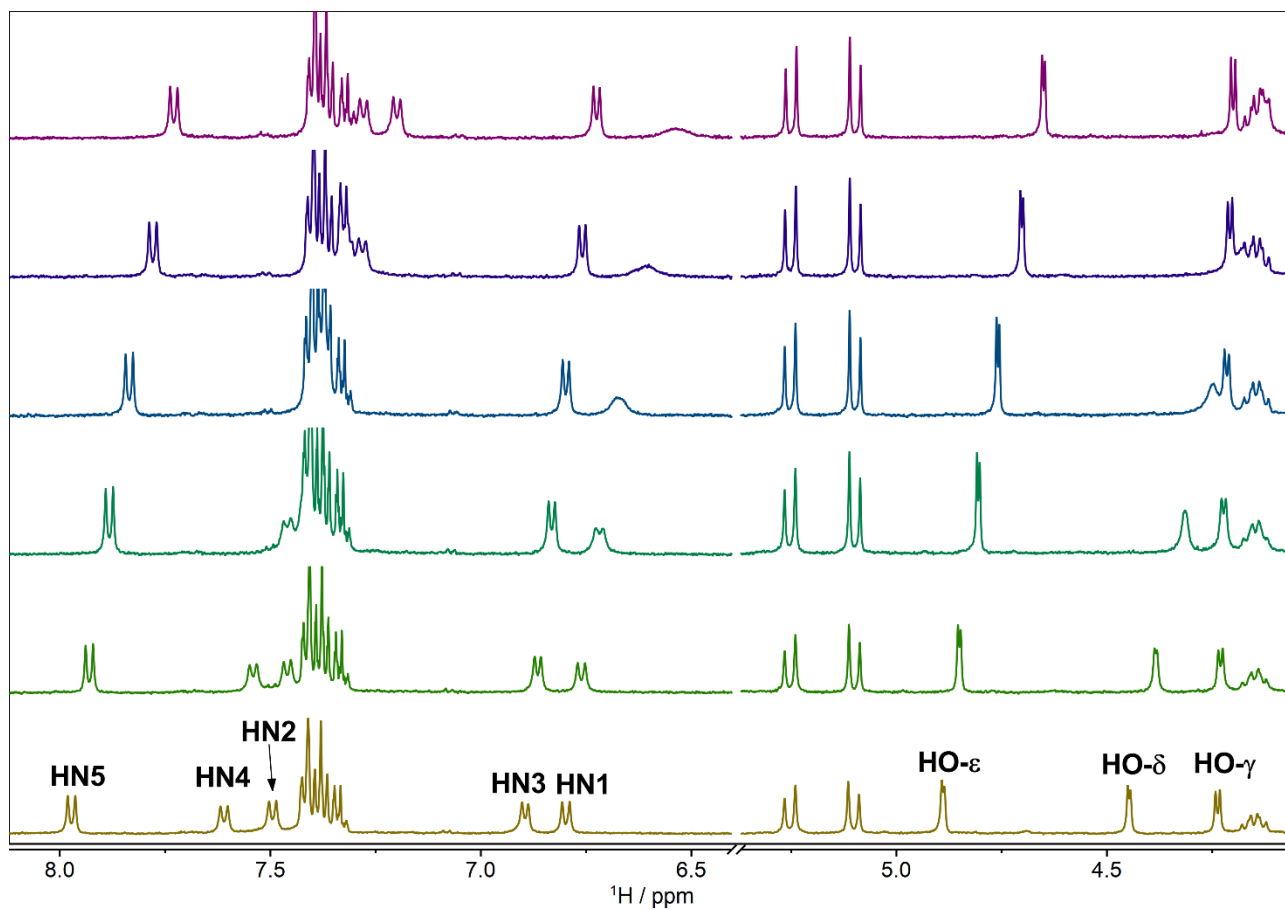

**Figure S41:** Expansion of the amide proton region of the VT-NMR spectra of peptide **16** in  $\text{DMSO-}d_6$  (500 MHz). Temperatures, from bottom to top: 298 to 348 K in 10 K steps.

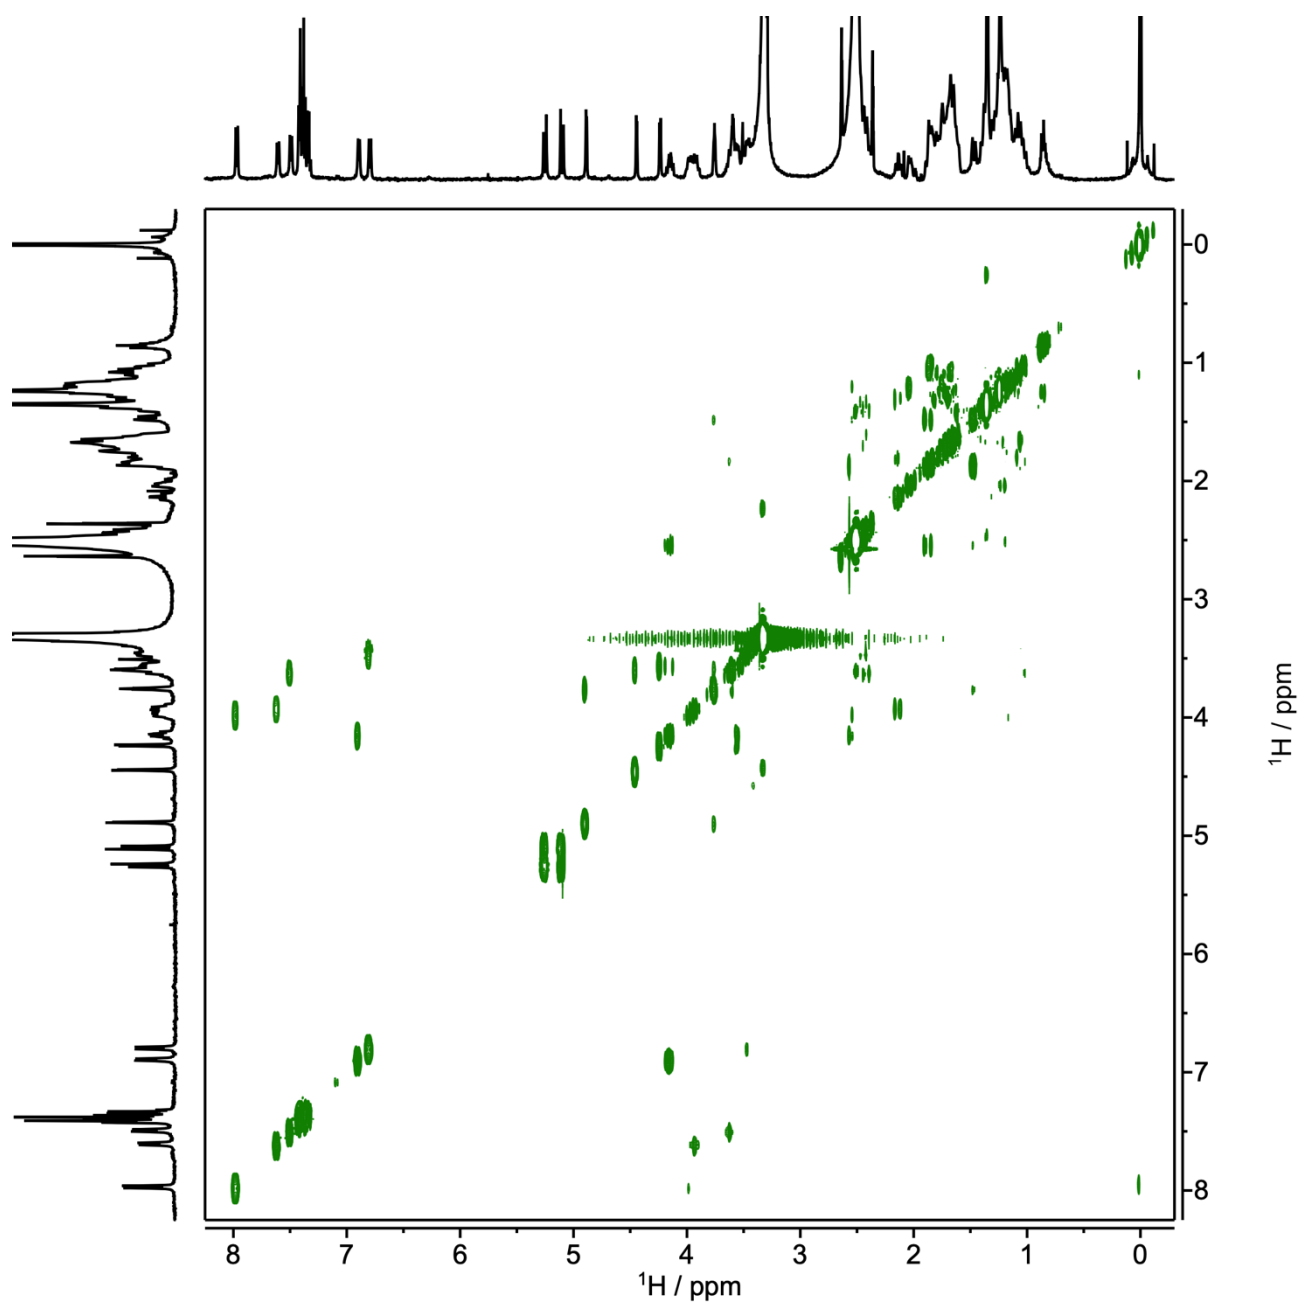

**Figure S42:** COSY spectrum of peptide **16** (DMSO- $d_6$ , 500 MHz, 298 K).

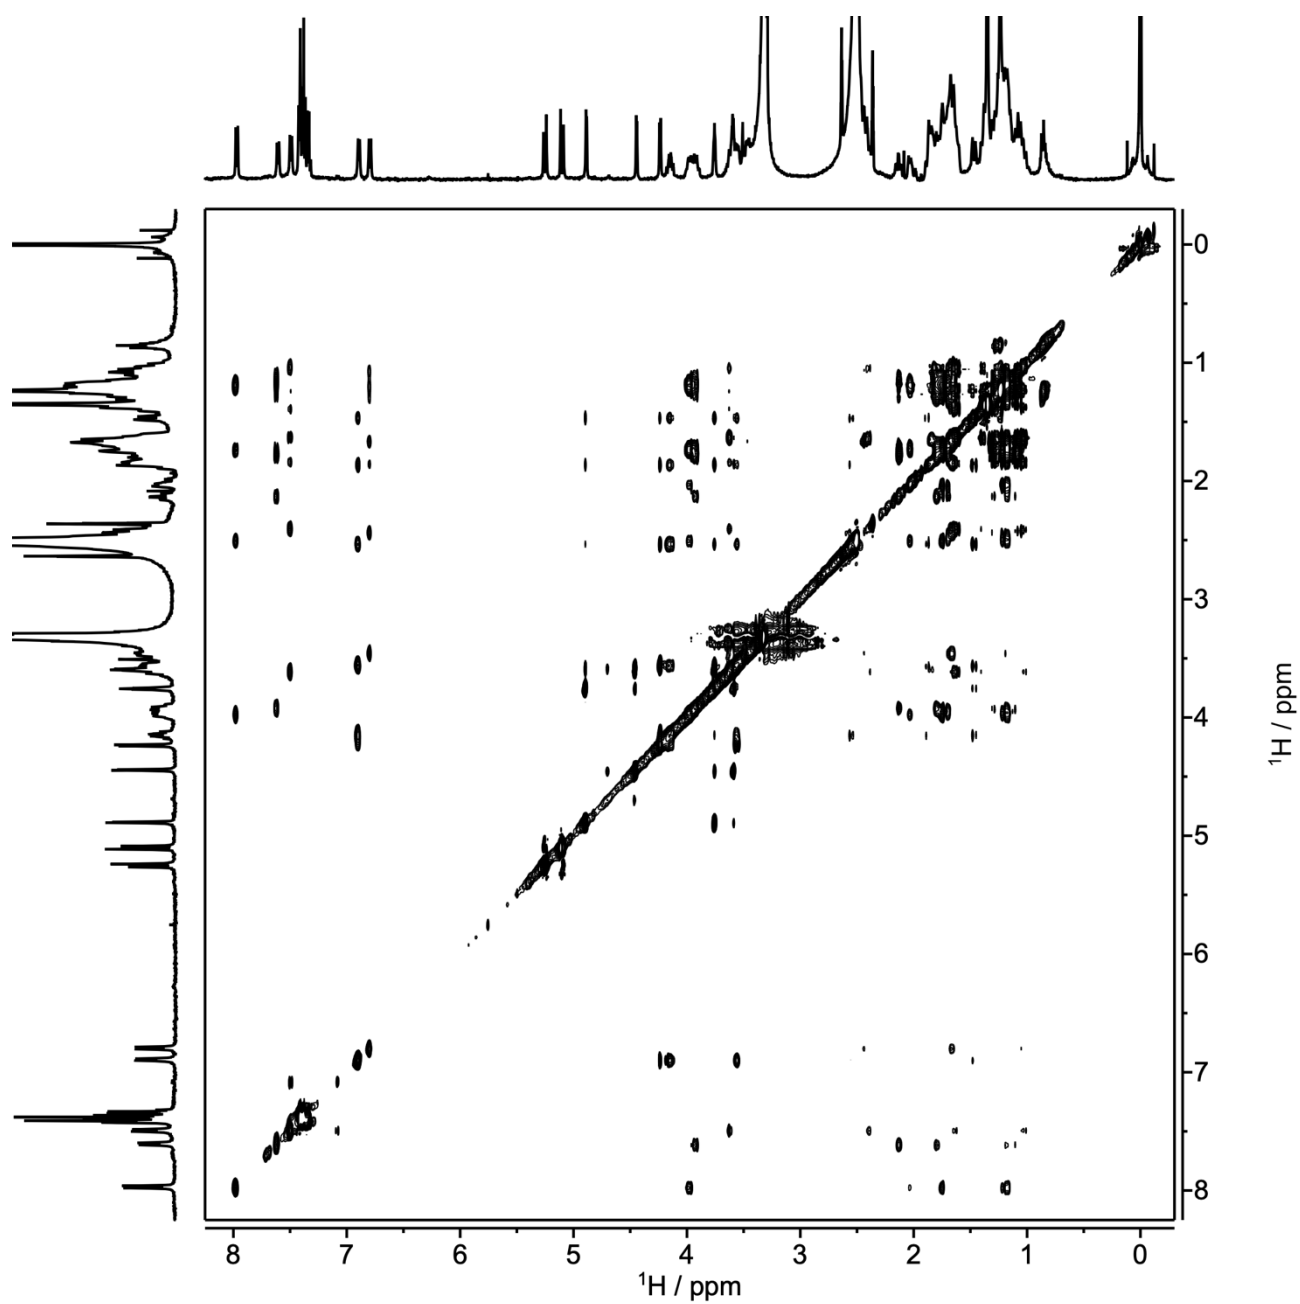

**Figure S43:** TOCSY spectrum of peptide **16**,  $t_{\text{mix}} = 80$  ms (DMSO- $d_6$ , 500 MHz, 298 K).

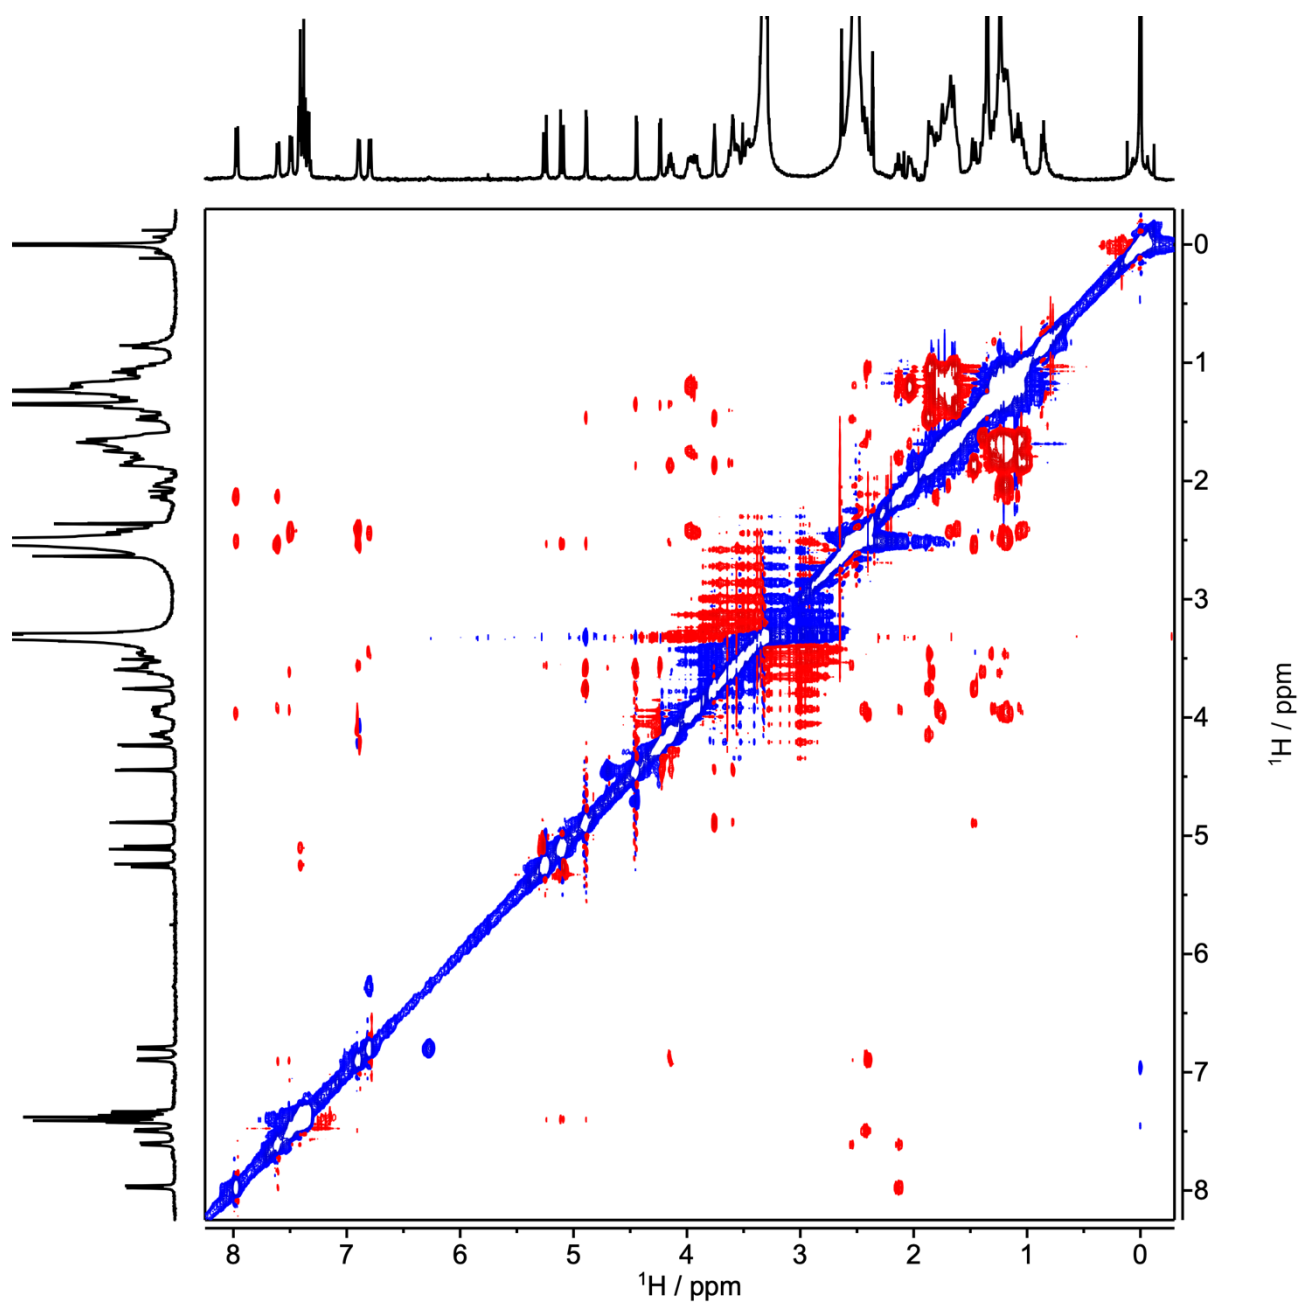

**Figure S44:** ROESY spectrum of peptide **16**,  $t_{\text{mix}} = 200$  ms (DMSO- $d_6$ , 500 MHz, 298 K).

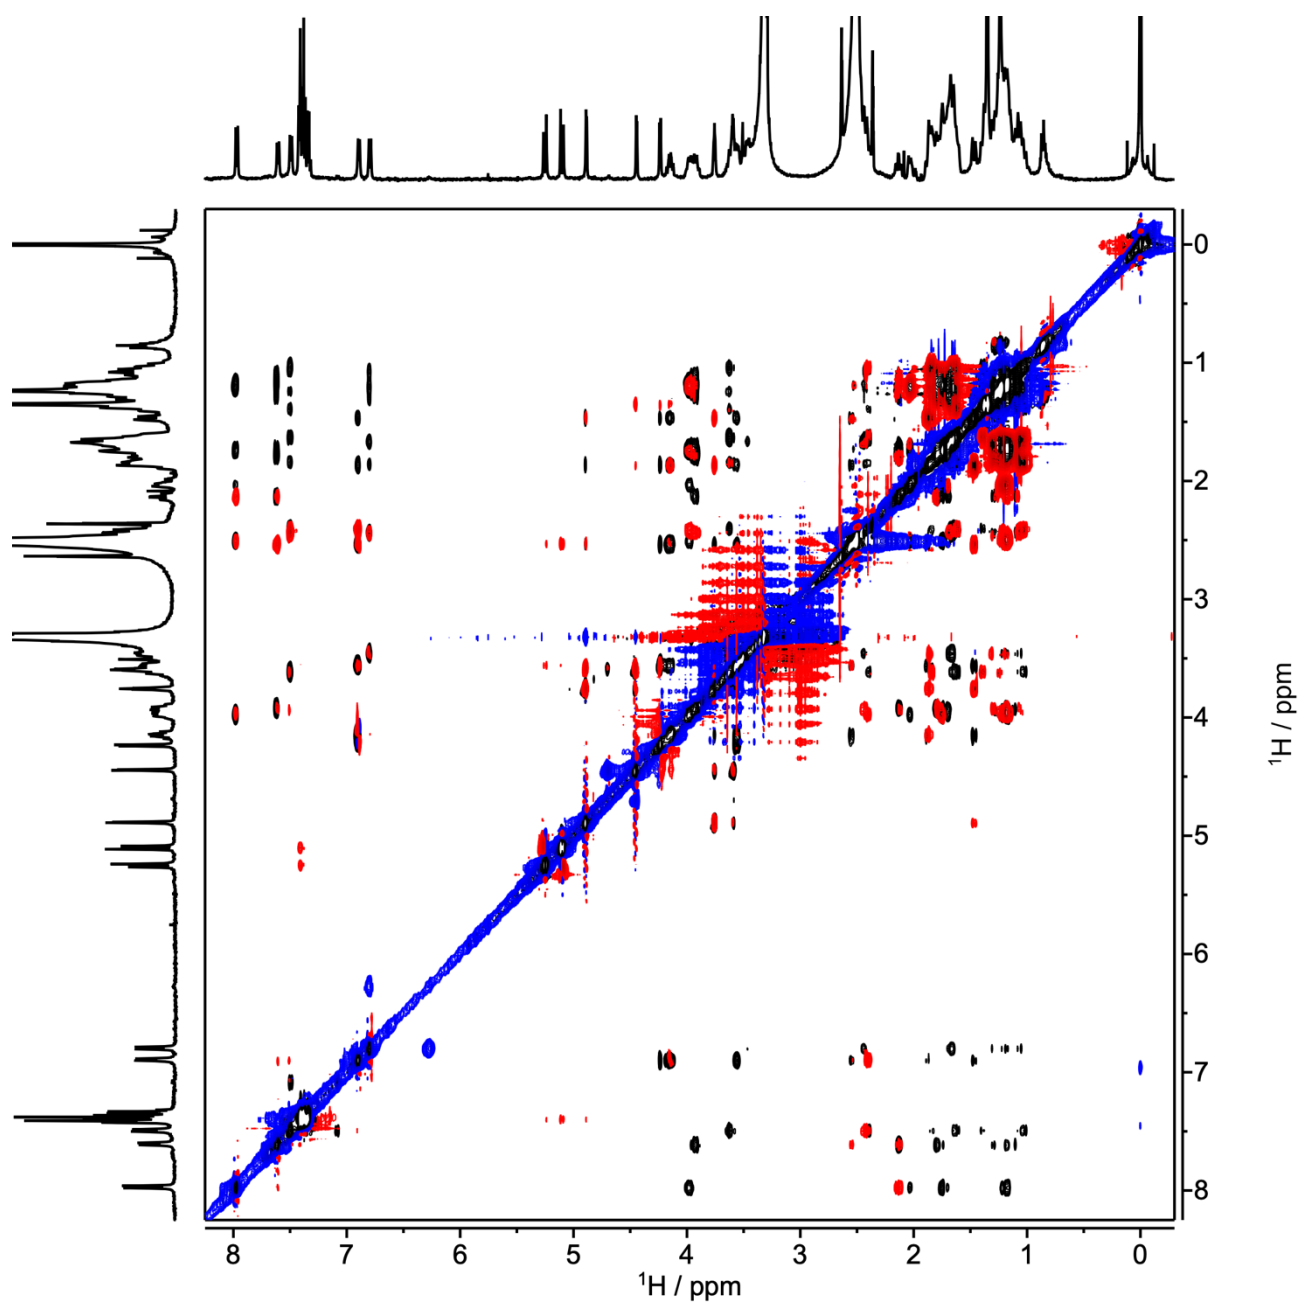

**Figure S45:** Overlay of the ROESY (red/blue,  $t_{\text{mix}}$  200 ms) and TOCSY (black,  $t_{\text{mix}}$  80 ms) spectra of peptide **16** (DMSO- $d_6$ , 500 MHz, 298 K).

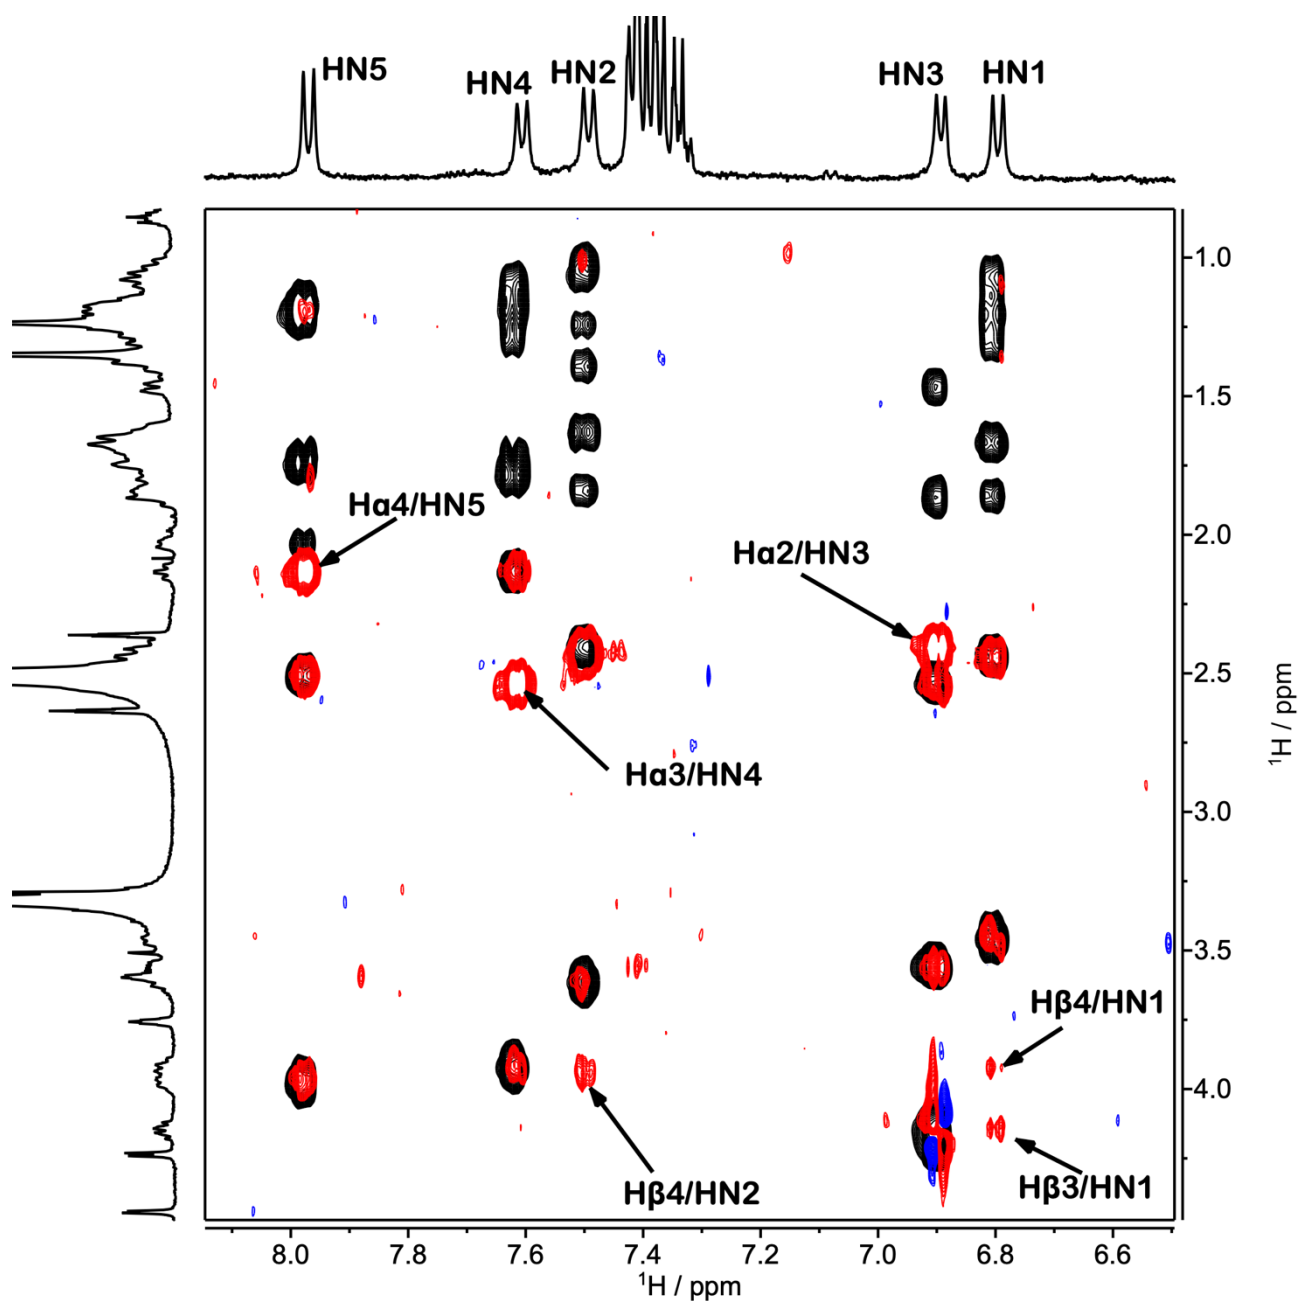

**Figure S46:** Overlay of the ROESY (*red/blue*,  $t_{\text{mix}}$  200 ms) and TOCSY (*black*,  $t_{\text{mix}}$  80 ms) spectra of peptide **16** (DMSO- $d_6$ , 500 MHz, 298 K). Expansion of the (H $\alpha$ +H $\beta$ )/HN region.

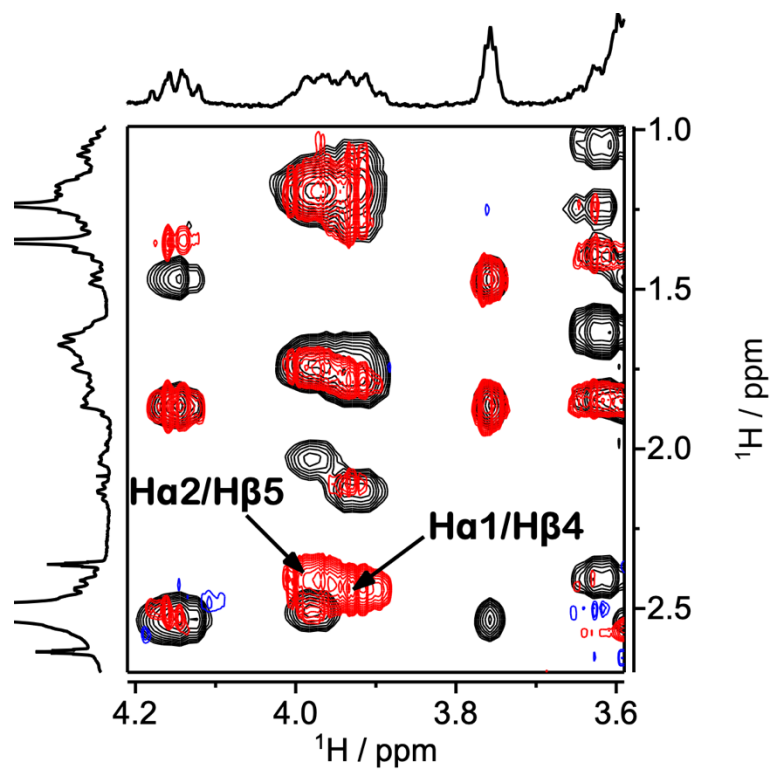

**Figure S47:** Overlay of the ROESY (red/blue,  $t_{\text{mix}}$  200 ms) and TOCSY (black,  $t_{\text{mix}}$  80 ms) spectra of peptide **16** (DMSO- $d_6$ , 500 MHz, 298 K). Expansion of the Ha/H $\beta$  region.



V-D. Peptide 16: NMR spectroscopy in methanol- $d_3$

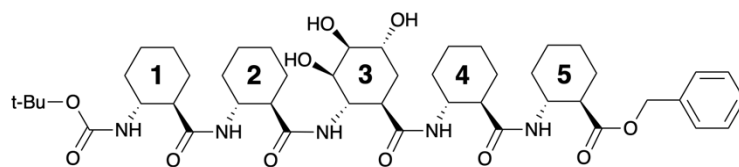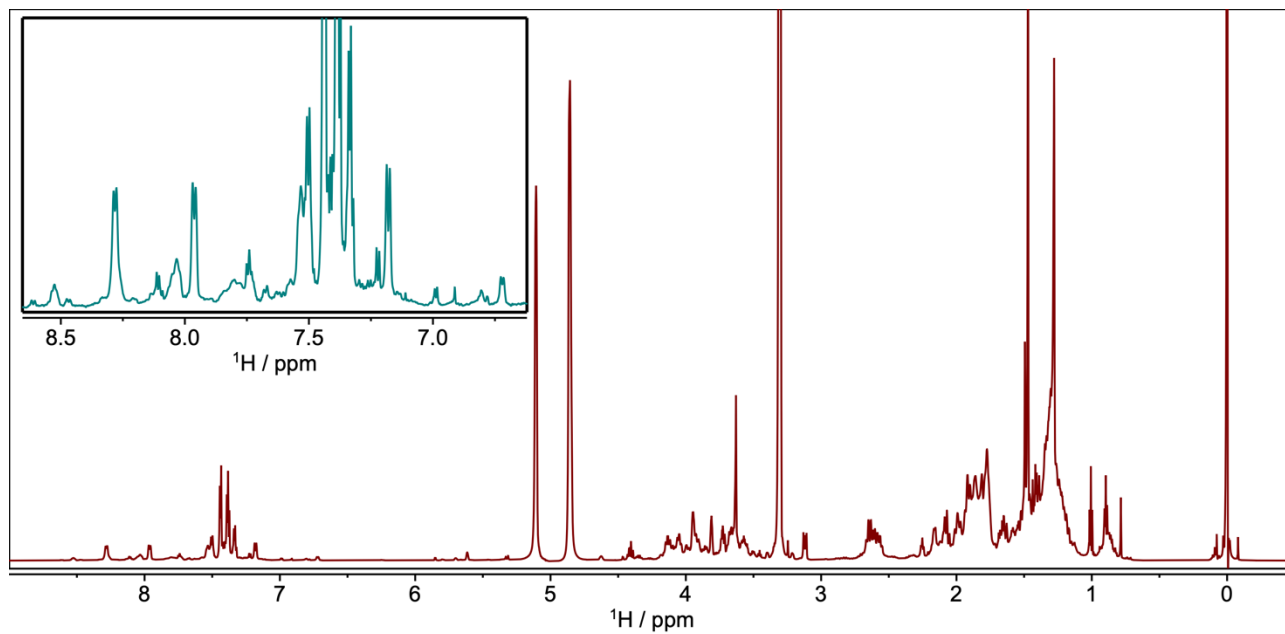

**Figure S48:**  $^1\text{H}$ -NMR spectrum of peptide **16** at 1 mM concentration (methanol- $d_3$ , 500 MHz, 298 K).

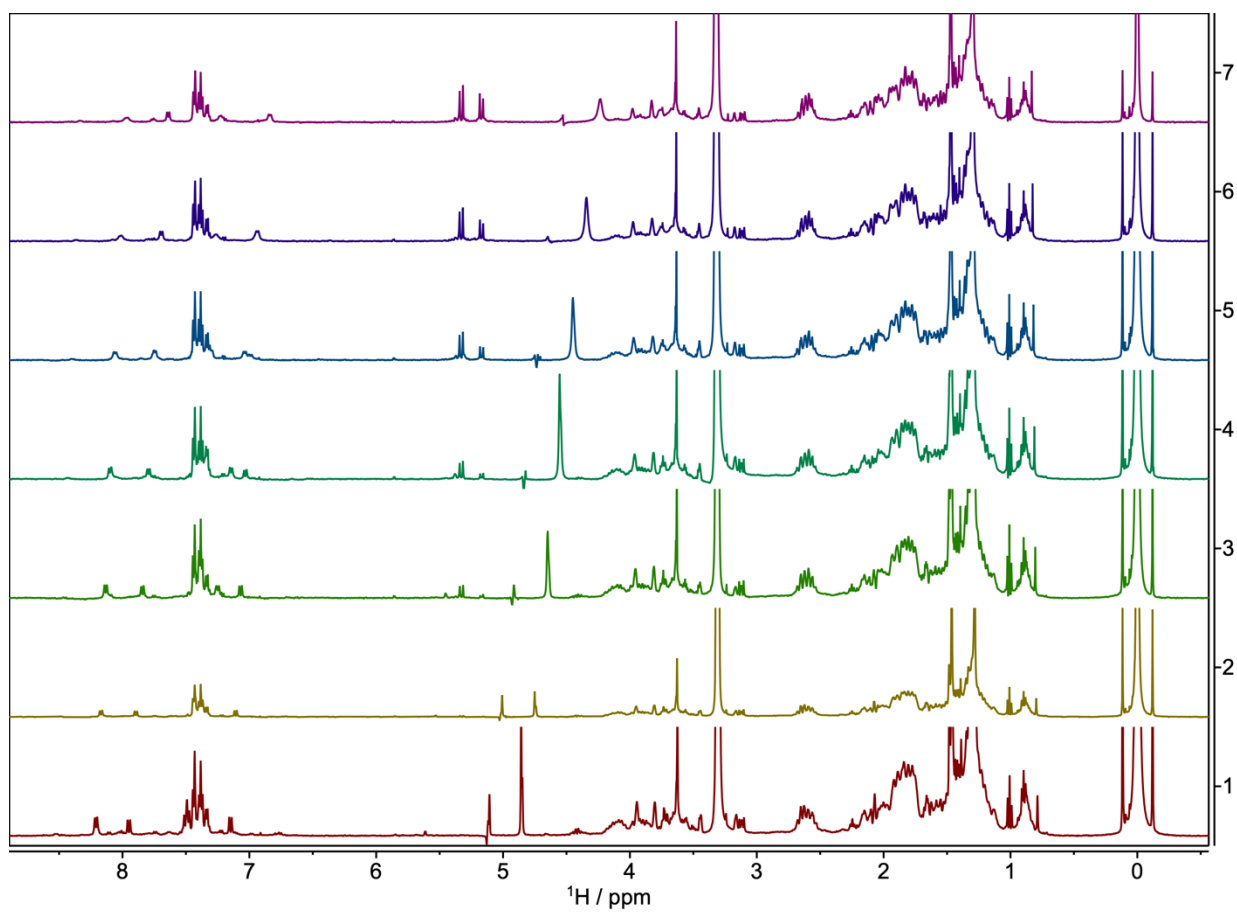

**Figure S49:** VT-NMR spectra of peptide **16** in methanol-*d*<sub>3</sub> (500 MHz). Temperatures, from bottom to top: 273 to 333 K in 10 K steps. The *zgpgw5* pulse program was used to suppress the strong HO signal.

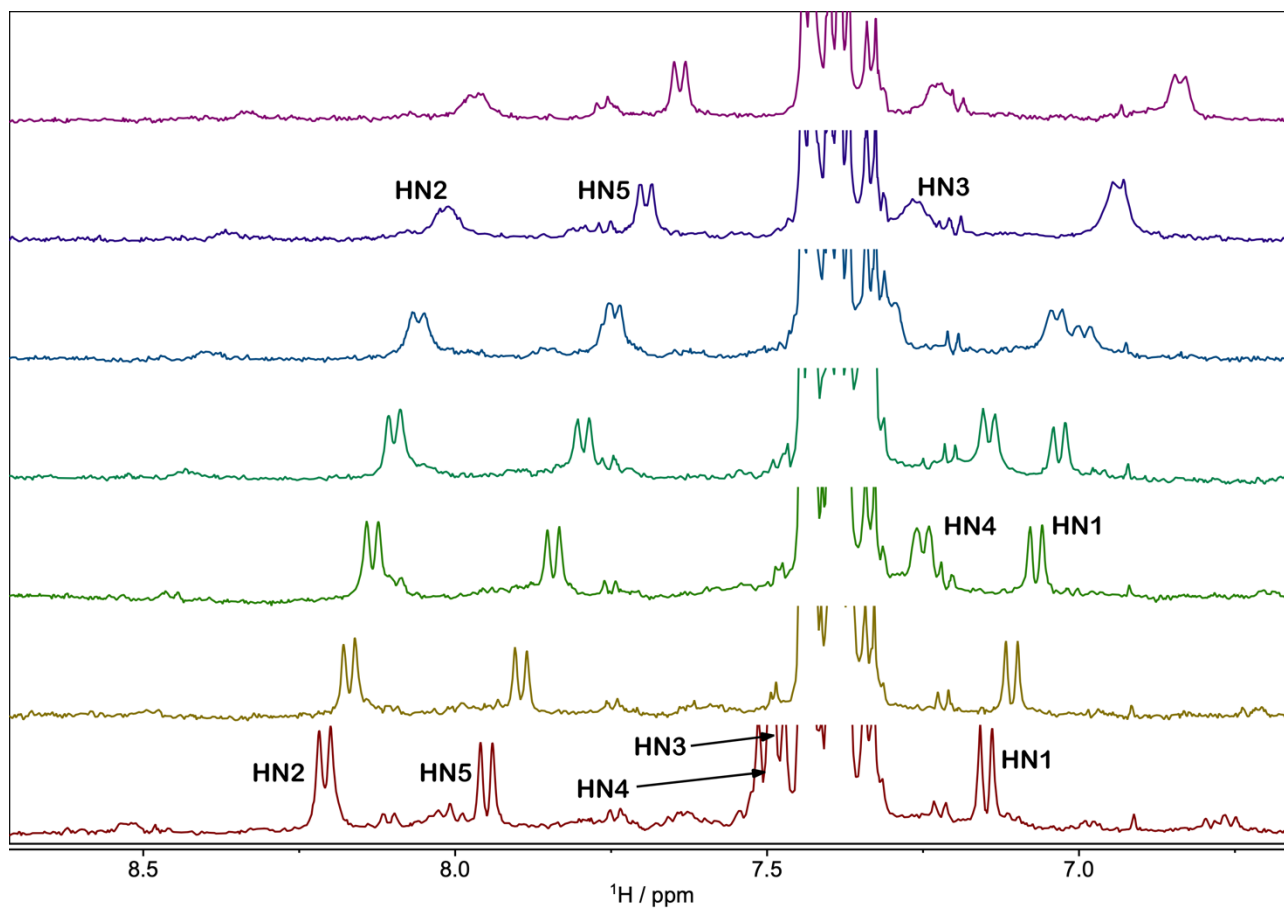

**Figure S50:** Expansion of the amide proton region of the VT-NMR spectra of peptide **16** in methanol- $d_3$  (500 MHz). Temperatures, from bottom to top: 273 to 333 K in 10 K steps.

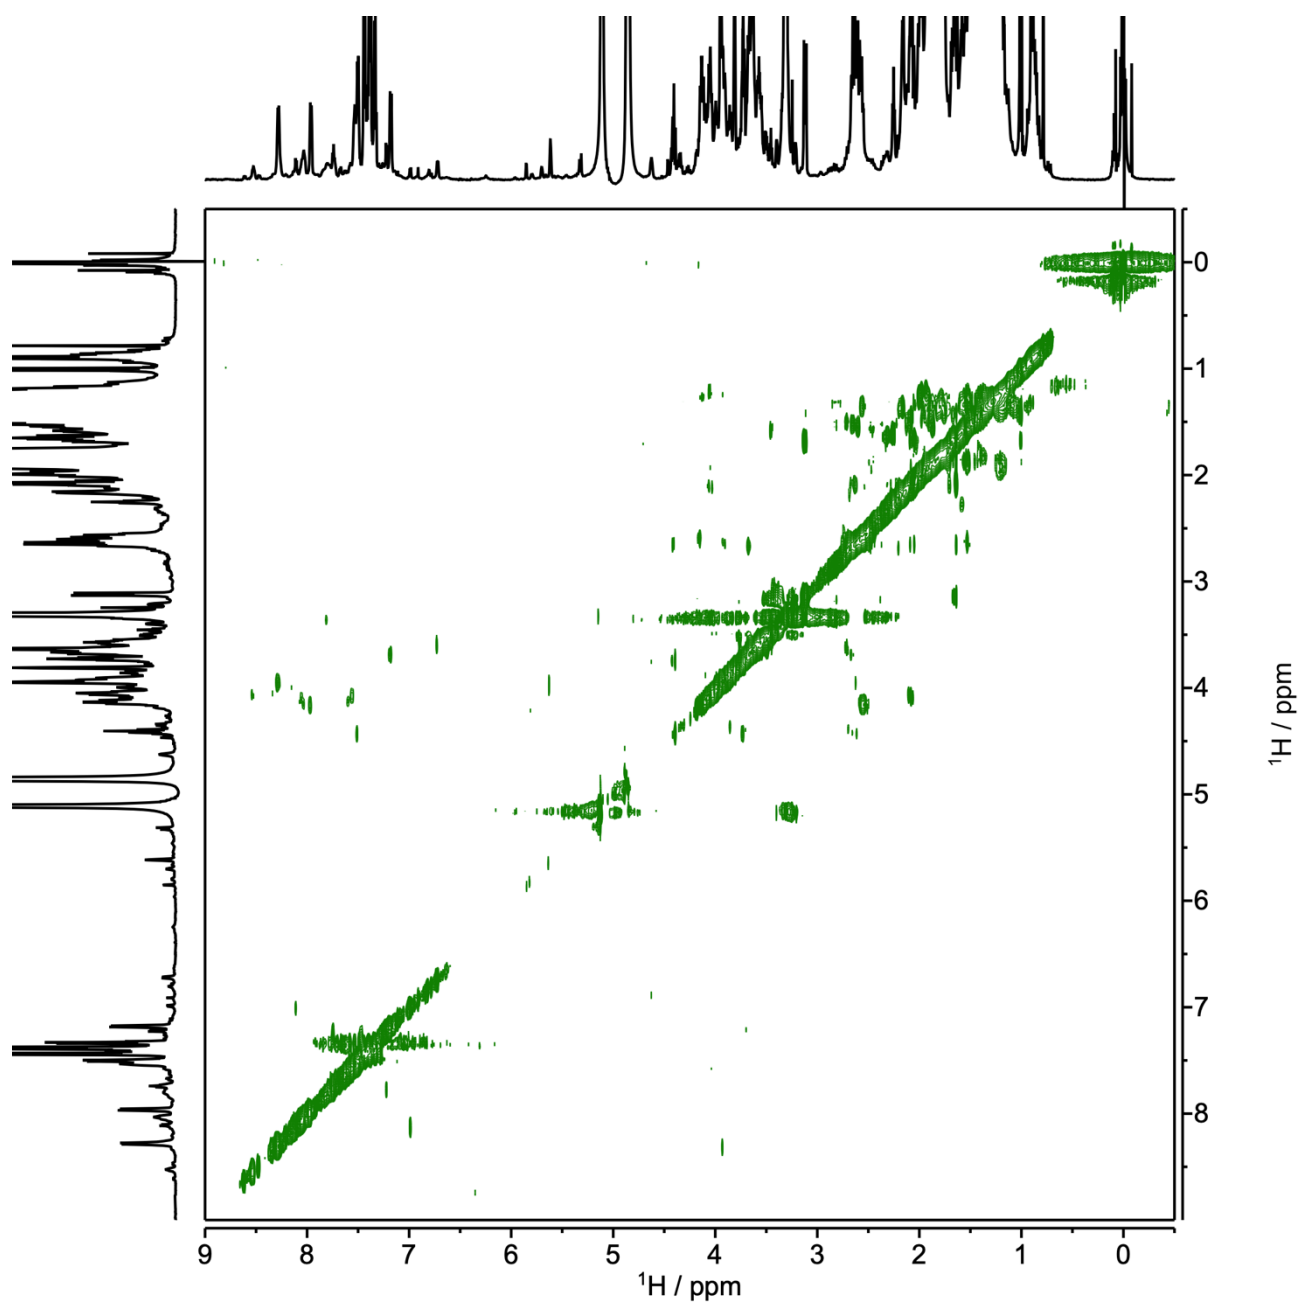

**Figure S51:** CLIP-COSY spectrum of peptide **16** (methanol- $d_3$ , 750 MHz, 273 K).

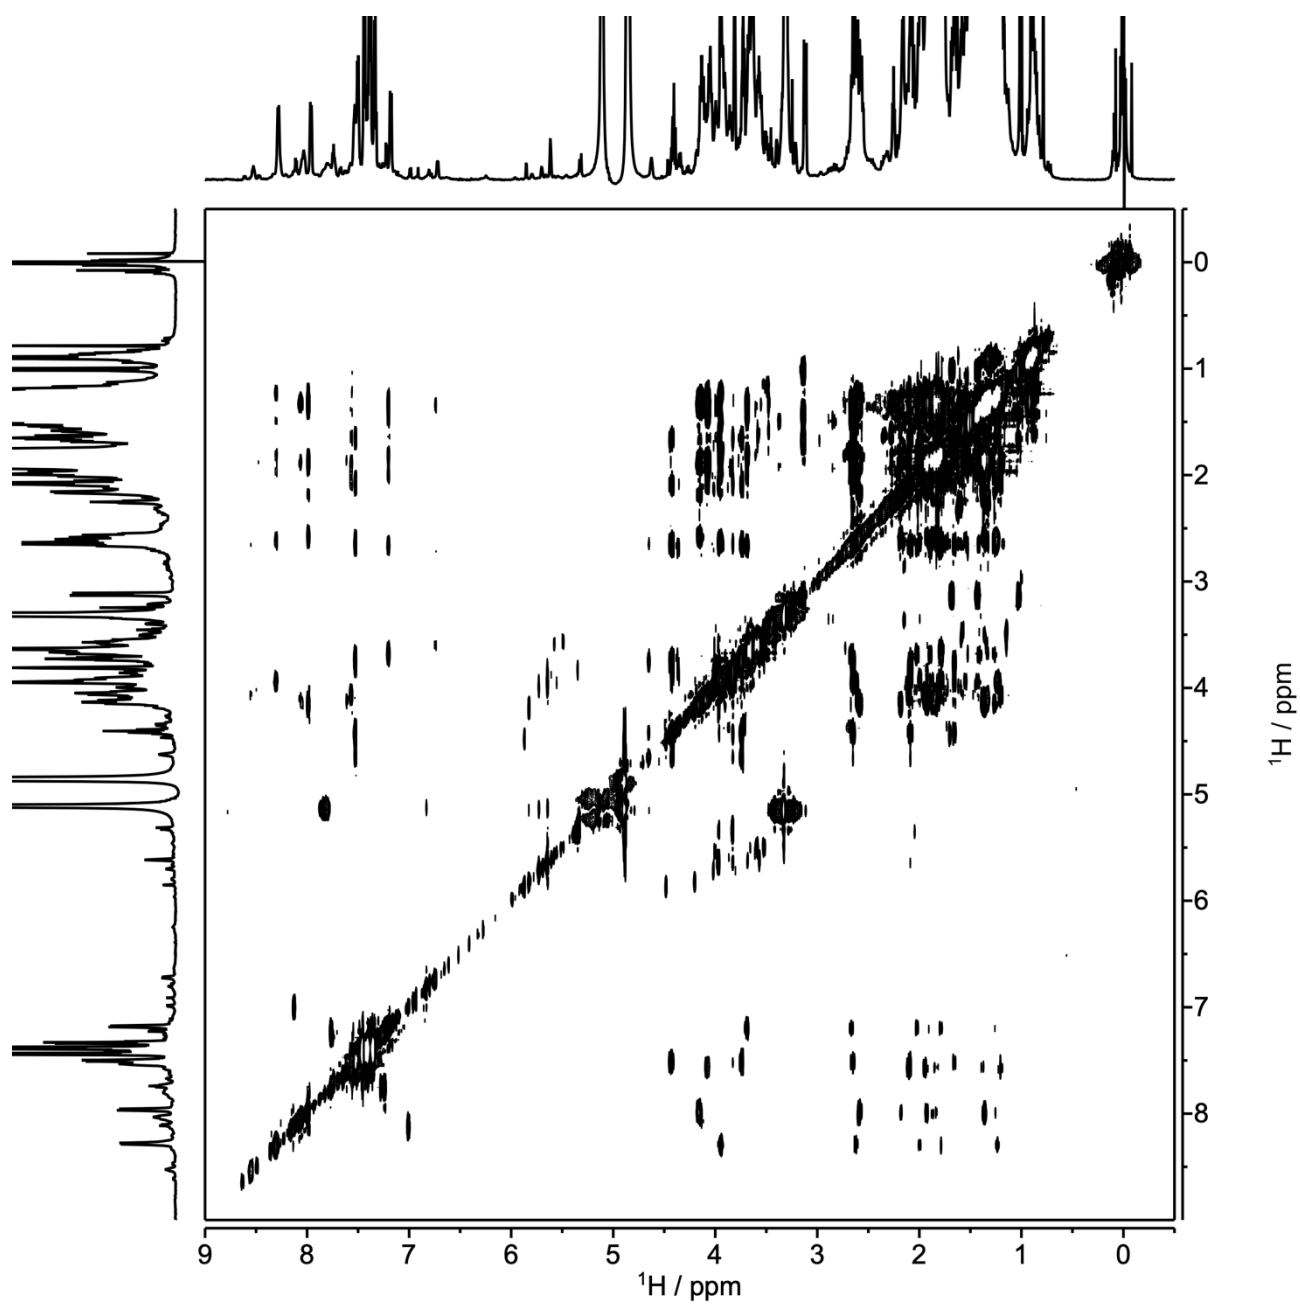

**Figure S52:** TOCSY spectrum of peptide **16**,  $t_{\text{mix}} = 80$  ms (methanol- $d_3$ , 750 MHz, 273 K).

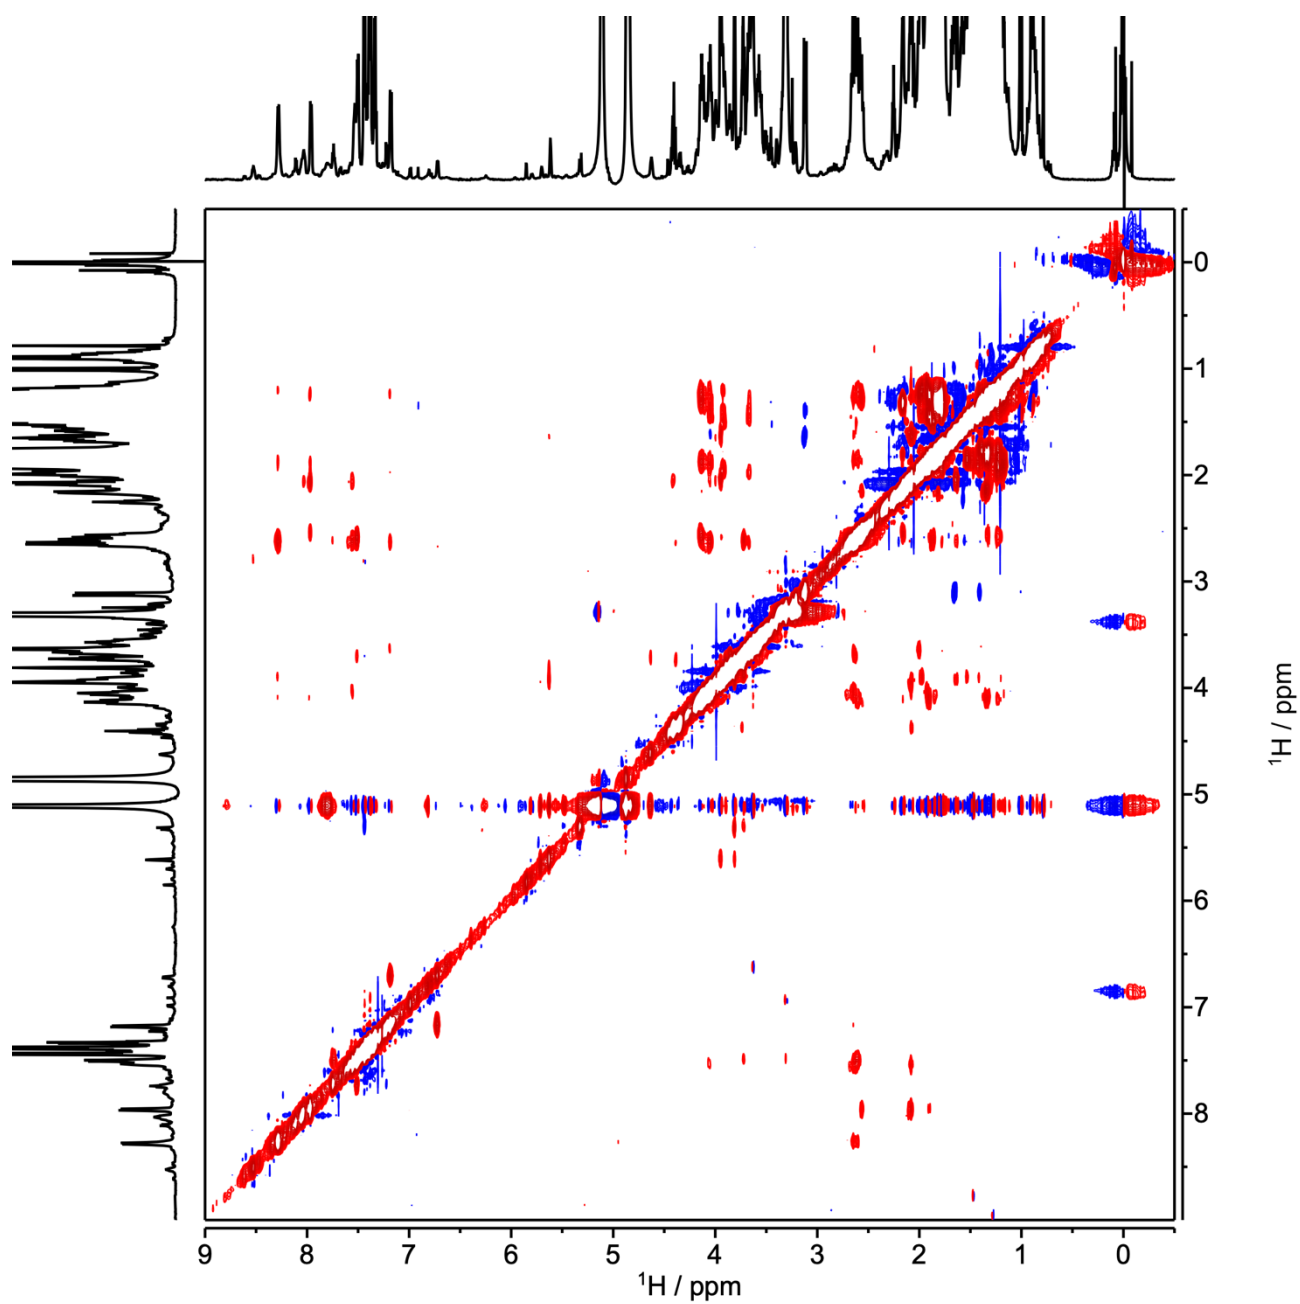

**Figure S53:** NOESY spectrum of peptide **16**,  $t_{\text{mix}} = 500$  ms (methanol- $d_3$ , 750 MHz, 273 K).

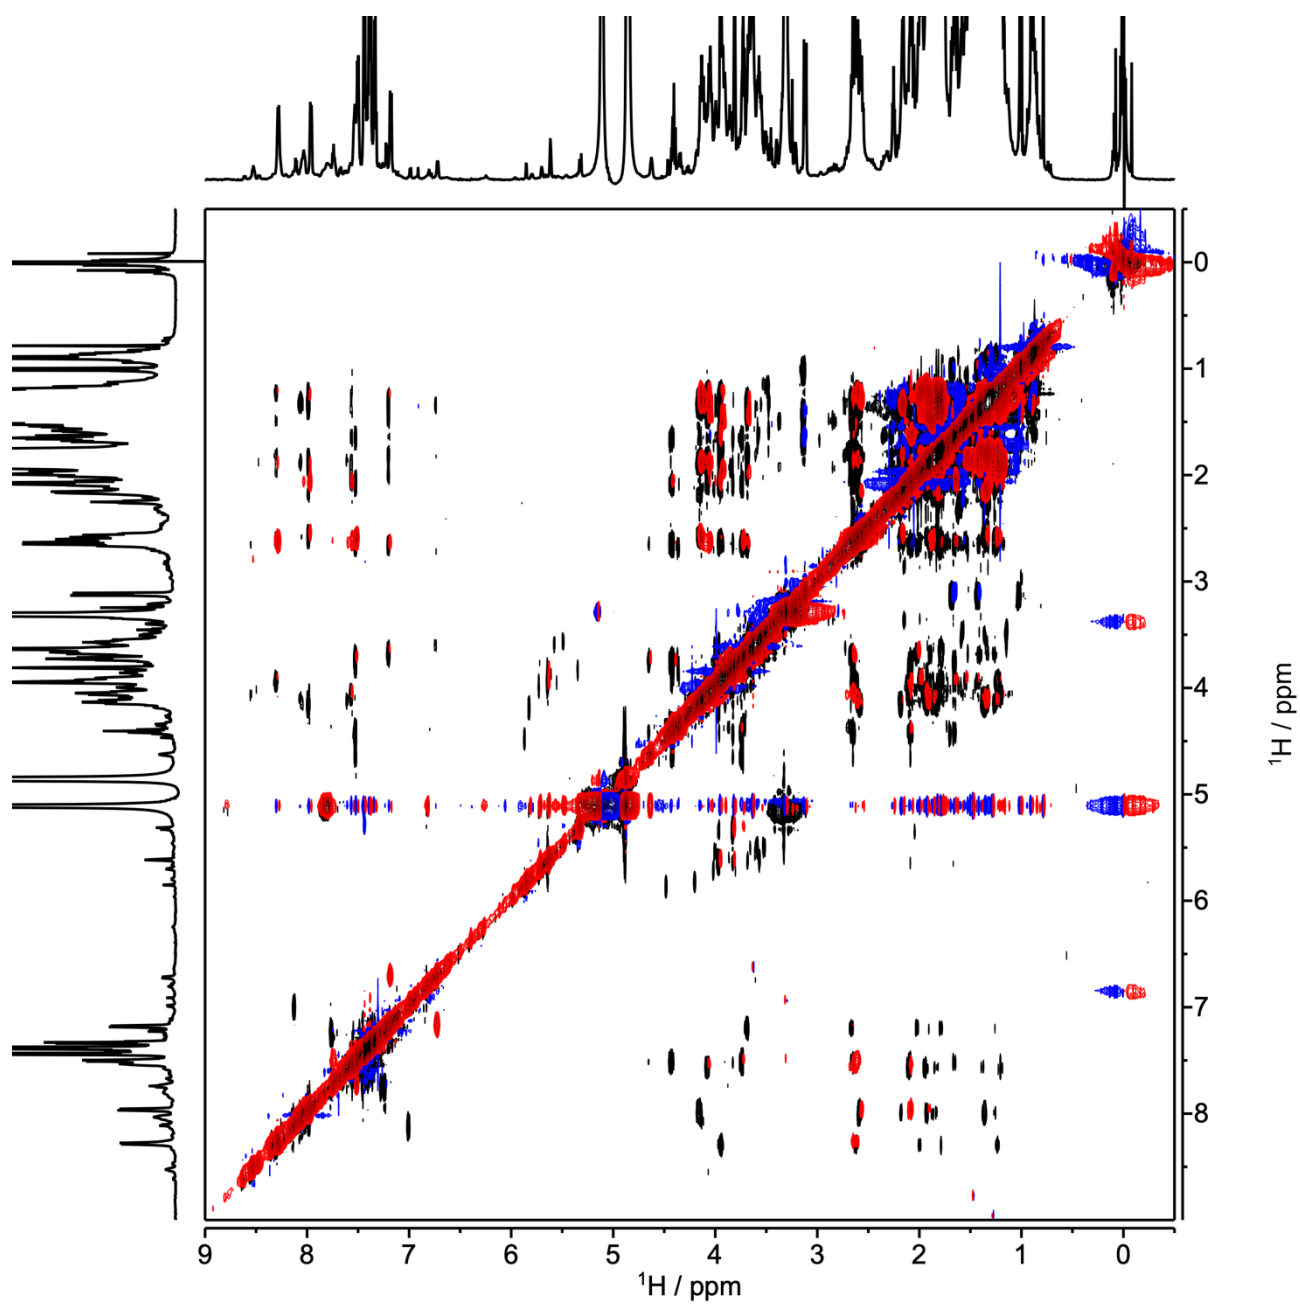

**Figure S54:** Overlay of the NOESY (red/blue,  $t_{\text{mix}}$  500 ms) and TOCSY (black,  $t_{\text{mix}}$  80 ms) spectra of peptide **16** (methanol- $d_3$ , 750 MHz, 273 K).

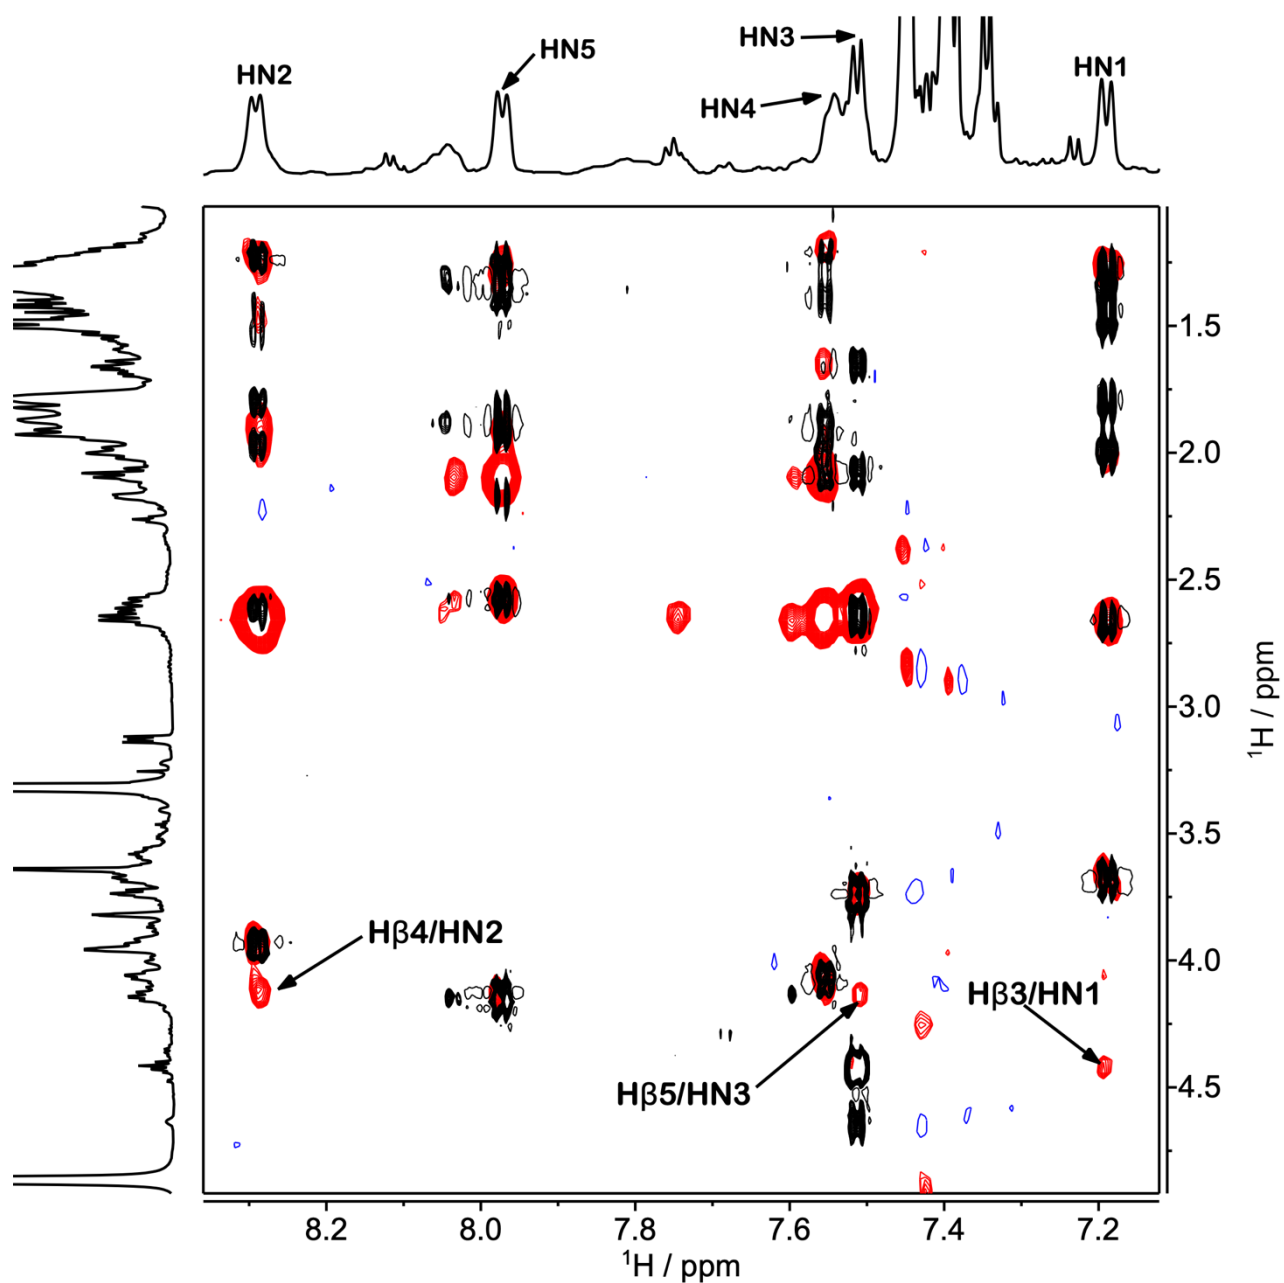

**Figure S55:** Overlay of the NOESY (red/blue,  $t_{mix}$  500 ms) and TOCSY (black,  $t_{mix}$  80 ms) spectra of peptide **16** (methanol- $d_3$ , 750 MHz, 273 K). Expansion of the  $(H\alpha+H\beta)/HN$  region. Assignment of the HN peaks of the major conformer is shown.



## V-E. NMR SPECTROSCOPY - TABLES

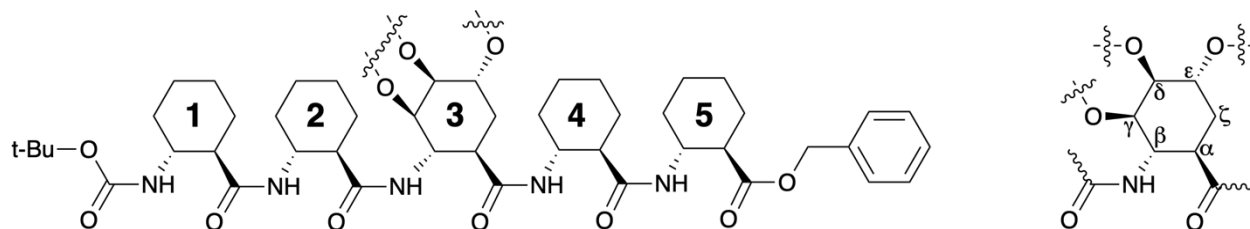

**Figure S56:** Residue and atom naming used in the following tables.

**Table S2:** Assignment of pentapeptide **14** in DMSO- $d_6$  (T = 298 K). Spectra were referenced to the resonance of TMS ( $\delta = 0.00$  ppm).

| residue                | HN   | H $\beta$ | H $\alpha$ | Other                                                                                                                                                                                                      |
|------------------------|------|-----------|------------|------------------------------------------------------------------------------------------------------------------------------------------------------------------------------------------------------------|
| t-Bu                   | —    | —         | —          | 1.35                                                                                                                                                                                                       |
| 1                      | 6.77 | 3.45      | 2.27       | 0.98, 1.01, 1.11, 1.20, 1.31, 1.34, 1.43, 1.65, 1.86                                                                                                                                                       |
| 2                      | 7.49 | 3.67      | 2.35       | 1.07, 1.10, 1.12, 1.14, 1.21, 1.30, 1.64, 1.67, 1.77, 1.80                                                                                                                                                 |
| 3                      | 6.83 | 4.02      | 2.34       | 0.03 (Si-CH <sub>3</sub> ), 0.04 (Si-CH <sub>3</sub> ), 0.08 (Si-tBu), 1.20 (CH <sub>3</sub> ), 1.48 (CH <sub>3</sub> ), 1.57 and 1.89 (H $\zeta^*$ ), 3.83-3.87 (H $\gamma$ , H $\delta$ , H $\epsilon$ ) |
| 4                      | 7.40 | 3.87      | 2.18       | 1.10, 1.12, 1.16, 1.30, 1.71, 1.76, 1.78                                                                                                                                                                   |
| 5                      | 7.82 | 3.93      | 2.52       | 1.19, 1.21, 1.23, 1.68, 1.72, 1.79, 1.88, 1.98                                                                                                                                                             |
| -O-CH <sub>2</sub> -Ph | —    | —         | —          | 4.98 and 5.26 (CH <sub>2</sub> ), 7.32-7.39 (Ph)                                                                                                                                                           |

**Table S3:** Assignment of pentapeptide **15** in DMSO- $d_6$  (T = 298 K). Spectra were referenced to the resonance of TMS ( $\delta = 0.00$  ppm).

| residue                | HN   | H $\beta$ | H $\alpha$ | other                                                                                                                                                                |
|------------------------|------|-----------|------------|----------------------------------------------------------------------------------------------------------------------------------------------------------------------|
| t-Bu                   | —    | —         | —          | 1.35                                                                                                                                                                 |
| 1                      | 6.92 | 3.44      | 2.35       | 0.99, 1.32, 1.66, 1.91                                                                                                                                               |
| 2                      | 7.49 | 3.70      | 2.36       | 1.09, 1.27, 1.65, 1.76                                                                                                                                               |
| 3                      | 6.72 | 4.05      | 2.44       | 1.21 (CH <sub>3</sub> ), 1.52 (CH <sub>3</sub> ), 1.63 and 1.83 (H $\zeta^*$ ), 3.77 (H $\gamma$ ), 3.96 (H $\delta$ ), 4.02 (H $\epsilon$ ), 5.20 (HO- $\epsilon$ ) |
| 4                      | 7.53 | 3.87      | 2.13       | 1.12, 1.26, 1.79                                                                                                                                                     |
| 5                      | 7.91 | 3.95      | 2.54       | 1.17, 1.24, 1.80                                                                                                                                                     |
| -O-CH <sub>2</sub> -Ph | —    | —         | —          | 5.09 and 5.28 (CH <sub>2</sub> ), 7.29-7.44 (Ph)                                                                                                                     |

**Table S4:** Assignment of pentapeptide **16** in DMSO- $d_6$  (T = 298 K). Spectra were referenced to the resonance of TMS ( $\delta = 0.00$  ppm).

| residue                | HN   | H $\beta$ | H $\alpha$ | other                                                                                                                                                          |
|------------------------|------|-----------|------------|----------------------------------------------------------------------------------------------------------------------------------------------------------------|
| t-Bu                   | —    | —         | —          | 1.35                                                                                                                                                           |
| 1                      | 6.80 | 3.46      | 2.44       | 1.06, 1.19, 1.32, 1.67, 1.86                                                                                                                                   |
| 2                      | 7.49 | 3.62      | 2.41       | 1.03, 1.08, 1.24, 1.38, 1.62, 1.85                                                                                                                             |
| 3                      | 6.89 | 4.19      | 2.54       | 1.47 and 1.88 (H $\zeta^*$ ), 3.56 (H $\gamma$ ), 3.60 (H $\delta$ ), 3.76 (H $\epsilon$ ), 4.25 (HO- $\gamma$ ), 4.47 (HO- $\delta$ ), 4.89 (HO- $\epsilon$ ) |
| 4                      | 7.61 | 3.93      | 2.13       | 1.09, 1.10, 1.19, 1.30, 1.73, 1.80                                                                                                                             |
| 5                      | 7.97 | 3.97      | 2.50       | 1.18, 1.21, 1.71, 1.75                                                                                                                                         |
| -O-CH <sub>2</sub> -Ph | —    | —         | —          | 5.10 and 5.25 (CH <sub>2</sub> ), 7.31-7.44 (Ph)                                                                                                               |

**Table S5:** Properties of amide HN protons (DMSO-*d*<sub>6</sub>, 500 MHz). Chemical shifts and scalar couplings were determined at 298 K. Temperature coefficients in –ppb/K units.

|            | $\delta_{\text{H}}$ (ppm) |           |           | ${}^3J_{\text{HN-H}\beta}$ (Hz) |           |           | T-coef (–ppb/K) |           |           |
|------------|---------------------------|-----------|-----------|---------------------------------|-----------|-----------|-----------------|-----------|-----------|
|            | <b>14</b>                 | <b>15</b> | <b>16</b> | <b>14</b>                       | <b>15</b> | <b>16</b> | <b>14</b>       | <b>15</b> | <b>16</b> |
| <b>HN1</b> | 6.77                      | 6.92      | 6.80      | 8.3                             | 8.5       | 8.8       | 7.3             | 7.5       | 5.2       |
| <b>HN2</b> | 7.49                      | 7.49      | 7.49      | 7.9                             | 8.3       | 8.6       | 5.6             | 4.9       | 4.3       |
| <b>HN3</b> | 6.83                      | 6.71      | 6.89      | 8.3                             | 9.2       | 7.3       | 0.9             | 1.7       | 3.4       |
| <b>HN4</b> | 7.40                      | 7.53      | 7.61      | 8.4                             | 8.6       | 8.6       | 9.0             | 9.2       | 8.2       |
| <b>HN5</b> | 7.82                      | 7.91      | 7.97      | 7.9                             | 8.6       | 8.9       | 5.2             | 5.4       | 4.9       |

**Table S6:** Properties of hydroxyl HO protons of residue 3 (DMSO-*d*<sub>6</sub>, 500 MHz). Chemical shifts and scalar couplings were determined at 298 K. Temperature coefficients in –ppb/K units.

|                                 | $\delta_{\text{H}}$ (ppm) |           |           | ${}^3J_{\text{HN-H}\beta}$ (Hz) |           |           | T-coef (–ppb/K) |           |           |
|---------------------------------|---------------------------|-----------|-----------|---------------------------------|-----------|-----------|-----------------|-----------|-----------|
|                                 | <b>14</b>                 | <b>15</b> | <b>16</b> | <b>14</b>                       | <b>15</b> | <b>16</b> | <b>14</b>       | <b>15</b> | <b>16</b> |
| <b>HO-<math>\gamma</math></b>   | —                         | —         | 4.24      | —                               | —         | 5.1       | —               | —         | 0.7       |
| <b>HO-<math>\delta</math></b>   | —                         | —         | 4.45      | —                               | —         | 3.1       | —               | —         | 6.4       |
| <b>HO-<math>\epsilon</math></b> | —                         | 5.20      | 4.89      | —                               | 3.3       | 2.9       | —               | 5.6       | 4.8       |

## V-F. TABLES OF NOEs

**Table S7:** Summary of backbone NOE intensities from the ROESY spectra of pentapeptides **14**, **15** and **16** (DMSO- $d_6$ , 500 MHz, 298 K). Classification of NOE intensities: **S** strong, **M** medium, **W** weak, **X** overlapped. The dash (—) indicates absence of cross-peak.

| proton (residue)                                 | proton (residue) | 14 | 15 | 16 |
|--------------------------------------------------|------------------|----|----|----|
| Intra-residual: HN(i) / H $\alpha$ (i)           |                  |    |    |    |
| HN (1)                                           | H $\alpha$ (1)   | S  | S  | S  |
| HN (2)                                           | H $\alpha$ (2)   | S  | S  | S  |
| HN (3)                                           | H $\alpha$ (3)   | S  | S  | S  |
| HN (4)                                           | H $\alpha$ (4)   | S  | S  | S  |
| HN (5)                                           | H $\alpha$ (5)   | S  | S  | S  |
| Intra-residual: HN(i) / H $\beta$ (i)            |                  |    |    |    |
| HN (1)                                           | H $\beta$ (1)    | M  | M  | M  |
| HN (2)                                           | H $\beta$ (2)    | M  | M  | M  |
| HN (3)                                           | H $\beta$ (3)    | M  | M  | M  |
| HN (4)                                           | H $\beta$ (4)    | M  | M  | M  |
| HN (5)                                           | H $\beta$ (5)    | M  | M  | M  |
| Inter-residual: HN(i) / H $\alpha$ (i-1)         |                  |    |    |    |
| HN (2)                                           | H $\alpha$ (1)   | S  | S  | S  |
| HN (3)                                           | H $\alpha$ (2)   | S  | S  | S  |
| HN (4)                                           | H $\alpha$ (3)   | S  | S  | S  |
| HN (5)                                           | H $\alpha$ (4)   | S  | S  | S  |
| Inter-residual: HN(i) / H $\beta$ (i-1)          |                  |    |    |    |
| HN (2)                                           | H $\beta$ (1)    | W  | W  | —  |
| HN (3)                                           | H $\beta$ (2)    | —  | —  | X  |
| HN (4)                                           | H $\beta$ (3)    | W  | —  | —  |
| HN (5)                                           | H $\beta$ (4)    | X  | —  | X  |
| Inter-residual: HN(i) / H $\beta$ (i+2)          |                  |    |    |    |
| HN (1)                                           | H $\beta$ (3)    | —  | —  | M  |
| HN (2)                                           | H $\beta$ (4)    | X  | M  | M  |
| HN (3)                                           | H $\beta$ (5)    | X  | X  | X  |
| Inter-residual: HN(i) / H $\beta$ (i+3)          |                  |    |    |    |
| HN (1)                                           | H $\beta$ (4)    | M  | M  | W  |
| HN (2)                                           | H $\beta$ (5)    | M  | —  | —  |
| Inter-residual: H $\alpha$ (i) / H $\beta$ (i+3) |                  |    |    |    |
| H $\alpha$ (1)                                   | H $\beta$ (4)    | S  | S  | S  |
| H $\alpha$ (2)                                   | H $\beta$ (5)    | S  | S  | S  |
| Inter-residual: HN / HN                          |                  |    |    |    |
| HN (3)                                           | HN (2)           | —  | —  | M  |
| HN (3)                                           | HN (4)           | —  | —  | W  |

**Table S8:** Summary of inter-residual NOE contacts of residue 3 with the *N*-terminal *t*-Bu group and the *C*-terminal OBn group, determined from the ROESY spectra of pentapeptides **14**, **15** and **16** (DMSO-*d*<sub>6</sub>, 500 MHz, 298 K). Classification of NOE intensities: **S** strong, **M** medium, **W** weak, **X** overlapped. The dash (—) indicates absence of cross-peak.

| proton (residue)                         | proton (residue)   | 14                | 15                | 16                |
|------------------------------------------|--------------------|-------------------|-------------------|-------------------|
| Inter-residual: <i>t</i> -Bu             |                    |                   |                   |                   |
| <i>t</i> -Bu (1)                         | H $\alpha$ (3)     | —                 | —                 | —                 |
| <i>t</i> -Bu (1)                         | H $\beta$ (3)      | W                 | W <sup>[b*]</sup> | W                 |
| <i>t</i> -Bu (1)                         | H $\gamma$ (3)     | —                 | —                 | —                 |
| <i>t</i> -Bu (1)                         | H $\delta$ (3)     | —                 | —                 | —                 |
| <i>t</i> -Bu (1)                         | H $\epsilon$ (3)   | —                 | W <sup>[b*]</sup> | —                 |
| <i>t</i> -Bu (1)                         | HO- $\gamma$ (3)   | <i>n.e.</i>       | <i>n.e.</i>       | W                 |
| <i>t</i> -Bu (1)                         | HO- $\delta$ (3)   | <i>n.e.</i>       | <i>n.e.</i>       | M                 |
| <i>t</i> -Bu (1)                         | HO- $\epsilon$ (3) | <i>n.e.</i>       | —                 | —                 |
| Inter-residual: Benzylic CH <sub>2</sub> |                    |                   |                   |                   |
| OCH <sub>2</sub> -a (5)                  | HN (3)             | —                 | W                 | W                 |
| OCH <sub>2</sub> -b (5)                  | HN (3)             | —                 | W                 | —                 |
| OCH <sub>2</sub> -a (5)                  | H $\alpha$ (3)     | W                 | M                 | M                 |
| OCH <sub>2</sub> -b (5)                  | H $\alpha$ (3)     | W                 | M                 | M                 |
| OCH <sub>2</sub> -a (5)                  | H $\gamma$ (3)     | W <sup>[a*]</sup> | M                 | M <sup>[c*]</sup> |
| OCH <sub>2</sub> -b (5)                  | H $\gamma$ (3)     | W <sup>[a*]</sup> | W                 | W <sup>[c*]</sup> |
| OCH <sub>2</sub> -a (5)                  | H $\delta$ (3)     | W <sup>[a*]</sup> | —                 | M <sup>[c*]</sup> |
| OCH <sub>2</sub> -b (5)                  | H $\delta$ (3)     | W <sup>[a*]</sup> | —                 | W <sup>[c*]</sup> |
| OCH <sub>2</sub> -a (5)                  | H $\epsilon$ (3)   | W <sup>[a*]</sup> | —                 | —                 |
| OCH <sub>2</sub> -b (5)                  | H $\epsilon$ (3)   | W <sup>[a*]</sup> | —                 | —                 |
| OCH <sub>2</sub> -a (5)                  | HO- $\epsilon$ (3) | <i>n.e.</i>       | —                 | —                 |
| OCH <sub>2</sub> -b (5)                  | HO- $\epsilon$ (3) | <i>n.e.</i>       | —                 | —                 |
| Inter-residual: Benzylic Ph              |                    |                   |                   |                   |
| Ph (5)                                   | HO- $\gamma$ (3)   | <i>n.e.</i>       | <i>n.e.</i>       | —                 |
| Ph (5)                                   | HO- $\delta$ (3)   | <i>n.e.</i>       | <i>n.e.</i>       | —                 |
| Ph (5)                                   | HO- $\epsilon$ (3) | <i>n.e.</i>       | W                 | W                 |
| Ph (5)                                   | H $\gamma$ (3)     | —                 | W                 | W <sup>[c*]</sup> |
| Ph (5)                                   | H $\delta$ (3)     | —                 | W                 | W <sup>[c*]</sup> |
| Ph (5)                                   | H $\epsilon$ (3)   | —                 | —                 | —                 |

O-CH<sub>2</sub>\*. The two diastereotopic benzylic protons give separate peaks but were not assigned stereospecifically. Labels 'a' and 'b' refer to the most deshielded and most shielded resonances, respectively.

*n.e.*: not existing, *i.e.* one or two of the H atoms do not exist in this compound.

[<sup>a\*</sup>] H $\gamma$ (3), H $\delta$ (3) and H $\epsilon$ (3) overlap in **14**.

[<sup>b\*</sup>] H $\beta$ (3) and H $\epsilon$ (3) overlap in **15**.

[<sup>c\*</sup>] H $\gamma$ (3) and H $\delta$ (3) overlap in **16**.

**Table S9:** Summary of intra-residual NOE contacts of residue 3 in the ROESY spectra of pentapeptides **14**, **15** and **16** (DMSO-*d*<sub>6</sub>, 500 MHz, 298 K). Classification of NOE intensities: **S** strong, **M** medium, **W** weak, **X** overlapped. The dash (—) indicates absence of cross-peak.

| proton (residue)          | proton (residue) | 14                | 15                | 16          |
|---------------------------|------------------|-------------------|-------------------|-------------|
| Intra-residual: hydroxyls |                  |                   |                   |             |
| HO-ε (3)                  | Hα (3)           | <i>n.e.</i>       | M                 | W           |
| HO-ε (3)                  | Hβ (3)           | <i>n.e.</i>       | W                 | —           |
| HO-ε (3)                  | Hγ (3)           | <i>n.e.</i>       | W                 | —           |
| HO-ε (3)                  | Hδ (3)           | <i>n.e.</i>       | M                 | M           |
| HO-ε (3)                  | Hε (3)           | <i>n.e.</i>       | M                 | S           |
| Intra-residual: acetonide |                  |                   |                   |             |
| Me-a (3)                  | Hα (3)           | —                 | —                 | <i>n.e.</i> |
| Me-b (3)                  | Hα (3)           | —                 | —                 | <i>n.e.</i> |
| Me-a (3)                  | Hβ (3)           | S                 | S <sup>[b*]</sup> | <i>n.e.</i> |
| Me-b (3)                  | Hβ (3)           | W                 | M <sup>[b*]</sup> | <i>n.e.</i> |
| Me-a (3)                  | Hγ (3)           | X <sup>[a*]</sup> | W                 | <i>n.e.</i> |
| Me-b (3)                  | Hγ (3)           | X <sup>[a*]</sup> | M                 | <i>n.e.</i> |
| Me-a (3)                  | Hδ (3)           | X <sup>[a*]</sup> | W                 | <i>n.e.</i> |
| Me-b (3)                  | Hδ (3)           | X <sup>[a*]</sup> | S                 | <i>n.e.</i> |
| Me-a (3)                  | Hε (3)           | X <sup>[a*]</sup> | S <sup>[b*]</sup> | <i>n.e.</i> |
| Me-b (3)                  | Hε (3)           | X <sup>[a*]</sup> | M <sup>[b*]</sup> | <i>n.e.</i> |
| Me-a (3)                  | HO-ε (3)         | <i>n.e.</i>       | W                 | <i>n.e.</i> |
| Me-b (3)                  | HO-ε (3)         | <i>n.e.</i>       | M                 | <i>n.e.</i> |

*Me-a* and *Me-b* refer to the methyl groups of the acetonide protecting group of residue 3. The two diastereotopic methyl groups give separate peaks but were not assigned stereospecifically. Labels 'a' and 'b' refer to the most deshielded and most shielded methyl resonances, respectively.

*n.e.*: not existing, *i.e.* one or two of the H atoms do not exist in this compound.

[<sup>a\*</sup>] Hγ(3), Hδ(3) and Hε(3) resonances overlap in **14**.

[<sup>b\*</sup>] Hβ(3) and Hε(3) resonances overlap in **15**.

**Table S10:** Assignment of pentapeptide **16** in CD<sub>3</sub>-OH (T = 273 K, 750 MHz). Spectra were referenced to the resonance of TMS ( $\delta = 0.00$  ppm).

| residue                | HN   | H $\beta$ | H $\alpha$ | other                                                                 |
|------------------------|------|-----------|------------|-----------------------------------------------------------------------|
| t-Bu                   | —    | —         | —          | 1.47                                                                  |
| 1                      | 7.19 | 3.68      | 2.66       | 1.31, 1.46, 1.81, 1.99                                                |
| 2                      | 8.29 | 3.94      | 2.60       | 1.25, 1.51, 1.80, 1.96                                                |
| 3                      | 7.51 | 4.42      | 2.63       | 3.73 and 4.63 (H $\gamma$ , H $\delta$ and H $\epsilon$ ); 1.65, 2.08 |
| 4                      | 7.56 | 4.06      | 2.08       | 1.22, 1.42, 1.87                                                      |
| 5                      | 7.97 | 4.15      | 2.57       | 1.31, 1.89, 2.19                                                      |
| -O-CH <sub>2</sub> -Ph | —    | —         | —          | 7.31-7.46 (Ph)                                                        |

**Table S11:** Properties of the amide HN protons of pentapeptide **16** in CD<sub>3</sub>-OH (T = 273 K, 750 MHz). Scalar couplings were determined at 273 K and 750 MHz.

|            | <sup>3</sup> J <sub>HN-H<math>\beta</math></sub> (Hz) | T-coef (-ppb/K) |
|------------|-------------------------------------------------------|-----------------|
| <b>HN1</b> | 9.2                                                   | 5.2             |
| <b>HN2</b> | 8.3                                                   | 4.0             |
| <b>HN3</b> | 8.2                                                   | 4.2             |
| <b>HN4</b> | 8.6                                                   | 11.0            |
| <b>HN5</b> | 9.2                                                   | 5.2             |

## VI. CARTESIAN COORDINATES OF PENTAPEPTIDES 14-16

Cartesian coordinates (Å) of conformations optimized at the M052X/6-31G(d) level.

### Peptide 14:

| Center<br>Number | Atomic<br>Number | Atomic<br>Type | Coordinates (Angstroms) |           |           |
|------------------|------------------|----------------|-------------------------|-----------|-----------|
|                  |                  |                | X                       | Y         | Z         |
| 1                | 7                | 0              | -4.119268               | -1.871251 | -0.525786 |
| 2                | 6                | 0              | -4.358270               | -3.114948 | -0.051754 |
| 3                | 8                | 0              | -5.461122               | -3.624593 | 0.046234  |
| 4                | 6                | 0              | -3.214895               | -5.066523 | 0.841217  |
| 5                | 8                | 0              | -3.189865               | -3.716635 | 0.297608  |
| 6                | 6                | 0              | -3.929915               | -5.072333 | 2.187774  |
| 7                | 6                | 0              | -3.845936               | -6.042624 | -0.148759 |
| 8                | 6                | 0              | -1.737952               | -5.396510 | 1.016779  |
| 9                | 6                | 0              | -4.868337               | 0.338628  | -1.252561 |
| 10               | 6                | 0              | -5.176774               | -1.162388 | -1.228898 |
| 11               | 6                | 0              | -5.350849               | -1.706170 | -2.650632 |
| 12               | 6                | 0              | -6.437259               | -0.950105 | -3.414381 |
| 13               | 6                | 0              | -6.116833               | 0.543987  | -3.455752 |
| 14               | 6                | 0              | -5.948777               | 1.095035  | -2.040341 |
| 15               | 6                | 0              | -4.847567               | 0.875355  | 0.170564  |
| 16               | 8                | 0              | -5.809972               | 0.725665  | 0.912469  |
| 17               | 7                | 0              | -3.732017               | 1.546672  | 0.543612  |
| 18               | 6                | 0              | -2.138604               | 2.038110  | 2.332566  |
| 19               | 6                | 0              | -3.607375               | 2.069479  | 1.892561  |
| 20               | 6                | 0              | -4.184378               | 3.477674  | 2.029401  |
| 21               | 6                | 0              | -4.060834               | 3.967802  | 3.473443  |
| 22               | 6                | 0              | -2.605836               | 3.915951  | 3.945584  |
| 23               | 6                | 0              | -2.023068               | 2.509656  | 3.786607  |
| 24               | 6                | 0              | -1.641001               | 0.612909  | 2.175291  |
| 25               | 8                | 0              | -2.200198               | -0.314804 | 2.738174  |
| 26               | 7                | 0              | -0.576448               | 0.452928  | 1.340379  |
| 27               | 6                | 0              | 0.420113                | -1.028448 | -0.409871 |
| 28               | 6                | 0              | -0.050549               | -0.860934 | 1.046522  |
| 29               | 6                | 0              | 1.140918                | -1.222738 | 1.940690  |
| 30               | 6                | 0              | 1.668073                | -2.631298 | 1.651740  |
| 31               | 6                | 0              | 1.679437                | -3.100039 | 0.197037  |
| 32               | 8                | 0              | 0.776034                | -1.314078 | 3.305950  |
| 33               | 8                | 0              | 0.763966                | -3.415707 | 2.413789  |
| 34               | 6                | 0              | 0.520631                | -2.691773 | 3.621124  |
| 35               | 6                | 0              | 1.505660                | -3.116551 | 4.699015  |
| 36               | 6                | 0              | -0.919833               | -2.899929 | 4.031589  |
| 37               | 8                | 0              | 2.924896                | -2.677262 | -0.366638 |
| 38               | 14               | 0              | 3.982749                | -3.821891 | -1.004235 |
| 39               | 6                | 0              | 5.473721                | -2.830559 | -1.607293 |
| 40               | 6                | 0              | 4.464899                | -5.043515 | 0.343743  |
| 41               | 6                | 0              | 3.136802                | -4.740558 | -2.412717 |
| 42               | 6                | 0              | 5.000636                | -1.732972 | -2.568546 |
| 43               | 6                | 0              | 6.171009                | -2.188295 | -0.400707 |
| 44               | 6                | 0              | 6.459140                | -3.752226 | -2.337685 |
| 45               | 6                | 0              | 0.547249                | -2.534922 | -0.655078 |
| 46               | 6                | 0              | -0.538224               | -0.394463 | -1.395860 |
| 47               | 8                | 0              | -1.628949               | -0.888426 | -1.669114 |
| 48               | 7                | 0              | -0.108390               | 0.745400  | -1.987322 |
| 49               | 6                | 0              | -0.603130               | 2.989457  | -2.849720 |
| 50               | 6                | 0              | -1.008322               | 1.513933  | -2.838666 |
| 51               | 6                | 0              | -1.074742               | 0.958871  | -4.260828 |

|     |   |   |           |           |           |
|-----|---|---|-----------|-----------|-----------|
| 52  | 6 | 0 | -2.071064 | 1.763224  | -5.097892 |
| 53  | 6 | 0 | -1.712158 | 3.250421  | -5.102463 |
| 54  | 6 | 0 | -1.617793 | 3.796031  | -3.676594 |
| 55  | 6 | 0 | -0.560809 | 3.500868  | -1.421270 |
| 56  | 8 | 0 | -1.435523 | 3.211254  | -0.611599 |
| 57  | 7 | 0 | 0.499123  | 4.279229  | -1.098240 |
| 58  | 6 | 0 | 2.270018  | 4.330036  | 0.586214  |
| 59  | 6 | 0 | 0.803175  | 4.635798  | 0.278933  |
| 60  | 6 | 0 | 0.472688  | 6.094402  | 0.595880  |
| 61  | 6 | 0 | 0.797082  | 6.419547  | 2.055467  |
| 62  | 6 | 0 | 2.261117  | 6.110762  | 2.372571  |
| 63  | 6 | 0 | 2.592595  | 4.651269  | 2.059301  |
| 64  | 6 | 0 | 2.604746  | 2.883875  | 0.302523  |
| 65  | 8 | 0 | 1.796167  | 1.980306  | 0.197952  |
| 66  | 8 | 0 | 3.917877  | 2.697962  | 0.201005  |
| 67  | 6 | 0 | 4.347477  | 1.328249  | -0.024430 |
| 68  | 6 | 0 | 5.837301  | 1.338777  | -0.190762 |
| 69  | 6 | 0 | 6.399117  | 1.516156  | -1.454187 |
| 70  | 6 | 0 | 6.671478  | 1.169338  | 0.913015  |
| 71  | 6 | 0 | 7.780718  | 1.517527  | -1.615857 |
| 72  | 6 | 0 | 8.053325  | 1.168333  | 0.755130  |
| 73  | 6 | 0 | 8.608513  | 1.340682  | -0.510230 |
| 74  | 1 | 0 | -3.158251 | -1.636035 | -0.743172 |
| 75  | 1 | 0 | -4.980807 | -4.822300 | 2.061810  |
| 76  | 1 | 0 | -3.466120 | -4.344586 | 2.856039  |
| 77  | 1 | 0 | -3.846750 | -6.064047 | 2.639077  |
| 78  | 1 | 0 | -3.369163 | -5.933941 | -1.125619 |
| 79  | 1 | 0 | -4.912701 | -5.865611 | -0.250477 |
| 80  | 1 | 0 | -3.678333 | -7.063326 | 0.203598  |
| 81  | 1 | 0 | -1.240701 | -5.416207 | 0.043435  |
| 82  | 1 | 0 | -1.631979 | -6.380004 | 1.479260  |
| 83  | 1 | 0 | -1.244071 | -4.654845 | 1.644278  |
| 84  | 1 | 0 | -3.892342 | 0.477934  | -1.730830 |
| 85  | 1 | 0 | -6.095340 | -1.309589 | -0.658603 |
| 86  | 1 | 0 | -5.587386 | -2.770032 | -2.582558 |
| 87  | 1 | 0 | -4.390787 | -1.608410 | -3.172763 |
| 88  | 1 | 0 | -7.399816 | -1.097428 | -2.913073 |
| 89  | 1 | 0 | -6.538210 | -1.349746 | -4.426549 |
| 90  | 1 | 0 | -6.903248 | 1.093630  | -3.979503 |
| 91  | 1 | 0 | -5.188439 | 0.694252  | -4.020128 |
| 92  | 1 | 0 | -6.888091 | 0.997767  | -1.488592 |
| 93  | 1 | 0 | -5.698786 | 2.160095  | -2.065681 |
| 94  | 1 | 0 | -2.999905 | 1.750248  | -0.121437 |
| 95  | 1 | 0 | -1.571416 | 2.711742  | 1.683709  |
| 96  | 1 | 0 | -4.167480 | 1.384898  | 2.532527  |
| 97  | 1 | 0 | -5.228921 | 3.454316  | 1.712727  |
| 98  | 1 | 0 | -3.639920 | 4.147136  | 1.352646  |
| 99  | 1 | 0 | -4.668679 | 3.325901  | 4.119628  |
| 100 | 1 | 0 | -4.455198 | 4.982554  | 3.567372  |
| 101 | 1 | 0 | -2.529568 | 4.238199  | 4.987163  |
| 102 | 1 | 0 | -2.013769 | 4.619812  | 3.346646  |
| 103 | 1 | 0 | -2.563120 | 1.799220  | 4.418662  |
| 104 | 1 | 0 | -0.975174 | 2.488471  | 4.100521  |
| 105 | 1 | 0 | -0.124699 | 1.264886  | 0.947930  |
| 106 | 1 | 0 | 1.405520  | -0.564003 | -0.523930 |
| 107 | 1 | 0 | -0.867685 | -1.559605 | 1.236614  |
| 108 | 1 | 0 | 1.906810  | -0.449772 | 1.839702  |
| 109 | 1 | 0 | 2.687910  | -2.737683 | 2.039389  |
| 110 | 1 | 0 | 1.610728  | -4.193975 | 0.217458  |
| 111 | 1 | 0 | 1.372972  | -2.489276 | 5.580960  |
| 112 | 1 | 0 | 2.530525  | -3.002277 | 4.343587  |
| 113 | 1 | 0 | 1.334543  | -4.158523 | 4.971056  |



|     |   |   |           |           |           |
|-----|---|---|-----------|-----------|-----------|
| 114 | 1 | 0 | -1.588467 | -2.534676 | 3.255453  |
| 115 | 1 | 0 | -1.122706 | -2.336763 | 4.942859  |
| 116 | 1 | 0 | -1.094467 | -3.961087 | 4.218846  |
| 117 | 1 | 0 | 4.892641  | -4.528720 | 1.206299  |
| 118 | 1 | 0 | 5.203160  | -5.759696 | -0.025263 |
| 119 | 1 | 0 | 3.600757  | -5.614418 | 0.691575  |
| 120 | 1 | 0 | 3.776254  | -5.538444 | -2.797477 |
| 121 | 1 | 0 | 2.893475  | -4.069478 | -3.239025 |
| 122 | 1 | 0 | 2.205599  | -5.201565 | -2.074016 |
| 123 | 1 | 0 | 4.522571  | -2.154636 | -3.456917 |
| 124 | 1 | 0 | 5.854946  | -1.131536 | -2.899874 |
| 125 | 1 | 0 | 4.281637  | -1.068973 | -2.082715 |
| 126 | 1 | 0 | 5.469399  | -1.597521 | 0.194183  |
| 127 | 1 | 0 | 6.972973  | -1.518125 | -0.731134 |
| 128 | 1 | 0 | 6.614016  | -2.945144 | 0.252018  |
| 129 | 1 | 0 | 6.010230  | -4.197309 | -3.229807 |
| 130 | 1 | 0 | 6.810512  | -4.562790 | -1.692793 |
| 131 | 1 | 0 | 7.338620  | -3.182424 | -2.657960 |
| 132 | 1 | 0 | 0.777090  | -2.747066 | -1.701550 |
| 133 | 1 | 0 | -0.404470 | -3.013369 | -0.414416 |
| 134 | 1 | 0 | 0.726023  | 1.178410  | -1.619400 |
| 135 | 1 | 0 | 0.388912  | 3.083948  | -3.311013 |
| 136 | 1 | 0 | -2.004455 | 1.450432  | -2.395338 |
| 137 | 1 | 0 | -1.367887 | -0.090273 | -4.205986 |
| 138 | 1 | 0 | -0.075749 | 1.007089  | -4.709000 |
| 139 | 1 | 0 | -3.074219 | 1.636575  | -4.676884 |
| 140 | 1 | 0 | -2.103205 | 1.376960  | -6.118491 |
| 141 | 1 | 0 | -2.453069 | 3.820956  | -5.666444 |
| 142 | 1 | 0 | -0.748592 | 3.389623  | -5.605642 |
| 143 | 1 | 0 | -2.590316 | 3.724021  | -3.179762 |
| 144 | 1 | 0 | -1.332681 | 4.851135  | -3.682799 |
| 145 | 1 | 0 | 1.172154  | 4.498281  | -1.814997 |
| 146 | 1 | 0 | 2.921628  | 4.946612  | -0.044201 |
| 147 | 1 | 0 | 0.176375  | 3.989829  | 0.895476  |
| 148 | 1 | 0 | -0.584381 | 6.262333  | 0.381788  |
| 149 | 1 | 0 | 1.052307  | 6.746003  | -0.068496 |
| 150 | 1 | 0 | 0.153194  | 5.820675  | 2.708341  |
| 151 | 1 | 0 | 0.575027  | 7.467826  | 2.262747  |
| 152 | 1 | 0 | 2.475673  | 6.317382  | 3.422740  |
| 153 | 1 | 0 | 2.909576  | 6.762270  | 1.776739  |
| 154 | 1 | 0 | 1.995420  | 3.991998  | 2.698526  |
| 155 | 1 | 0 | 3.644813  | 4.437341  | 2.251985  |
| 156 | 1 | 0 | 4.032870  | 0.724652  | 0.826860  |
| 157 | 1 | 0 | 3.843518  | 0.954275  | -0.915062 |
| 158 | 1 | 0 | 5.750722  | 1.639210  | -2.314266 |
| 159 | 1 | 0 | 6.235991  | 1.024759  | 1.895117  |
| 160 | 1 | 0 | 8.210065  | 1.648807  | -2.600863 |
| 161 | 1 | 0 | 8.695254  | 1.027229  | 1.615139  |
| 162 | 1 | 0 | 9.683782  | 1.333777  | -0.635124 |

-----

**Peptide 15:**

| Center<br>Number | Atomic<br>Number | Atomic<br>Type | Coordinates (Angstroms) |          |           |
|------------------|------------------|----------------|-------------------------|----------|-----------|
|                  |                  |                | X                       | Y        | Z         |
| 1                | 7                | 0              | 4.109606                | 0.640959 | -0.513784 |
| 2                | 1                | 0              | 3.156362                | 0.683356 | -0.853039 |

|    |   |   |           |           |           |
|----|---|---|-----------|-----------|-----------|
| 3  | 6 | 0 | 4.735968  | 1.824021  | -0.314904 |
| 4  | 8 | 0 | 5.935112  | 1.958484  | -0.144679 |
| 5  | 6 | 0 | 4.309007  | 4.214450  | -0.212811 |
| 6  | 8 | 0 | 3.835399  | 2.843025  | -0.336408 |
| 7  | 6 | 0 | 3.040778  | 5.038160  | -0.399484 |
| 8  | 1 | 0 | 2.272802  | 4.743853  | 0.315674  |
| 9  | 1 | 0 | 2.648839  | 4.896959  | -1.409855 |
| 10 | 1 | 0 | 3.265830  | 6.097833  | -0.262412 |
| 11 | 6 | 0 | 4.901186  | 4.441437  | 1.173736  |
| 12 | 1 | 0 | 5.146690  | 5.499270  | 1.294844  |
| 13 | 1 | 0 | 5.801756  | 3.845807  | 1.303633  |
| 14 | 1 | 0 | 4.174494  | 4.161968  | 1.938365  |
| 15 | 6 | 0 | 5.304190  | 4.547897  | -1.321812 |
| 16 | 1 | 0 | 4.877124  | 4.280140  | -2.291120 |
| 17 | 1 | 0 | 6.240680  | 4.015032  | -1.184132 |
| 18 | 1 | 0 | 5.494576  | 5.623813  | -1.316134 |
| 19 | 6 | 0 | 4.081663  | -1.802069 | -0.633497 |
| 20 | 1 | 0 | 3.167717  | -1.727880 | -1.234237 |
| 21 | 6 | 0 | 4.905545  | -0.528861 | -0.856193 |
| 22 | 1 | 0 | 5.754147  | -0.551683 | -0.170722 |
| 23 | 6 | 0 | 5.406291  | -0.446549 | -2.301886 |
| 24 | 1 | 0 | 5.999476  | 0.464166  | -2.405717 |
| 25 | 1 | 0 | 4.534291  | -0.356735 | -2.962110 |
| 26 | 6 | 0 | 6.223151  | -1.679451 | -2.685693 |
| 27 | 1 | 0 | 7.113366  | -1.734008 | -2.049955 |
| 28 | 1 | 0 | 6.570358  | -1.599156 | -3.718798 |
| 29 | 6 | 0 | 5.390309  | -2.946078 | -2.494319 |
| 30 | 1 | 0 | 5.974947  | -3.835450 | -2.743317 |
| 31 | 1 | 0 | 4.537352  | -2.919120 | -3.182966 |
| 32 | 6 | 0 | 4.886160  | -3.042538 | -1.055055 |
| 33 | 1 | 0 | 5.733590  | -3.130597 | -0.369362 |
| 34 | 1 | 0 | 4.268417  | -3.935718 | -0.919330 |
| 35 | 6 | 0 | 3.747671  | -1.937913 | 0.844718  |
| 36 | 8 | 0 | 4.635121  | -1.938587 | 1.687868  |
| 37 | 7 | 0 | 2.440428  | -2.099265 | 1.162047  |
| 38 | 1 | 0 | 1.731773  | -2.158797 | 0.445690  |
| 39 | 6 | 0 | 0.655006  | -1.513791 | 2.725044  |
| 40 | 1 | 0 | -0.079711 | -2.091752 | 2.156137  |
| 41 | 6 | 0 | 2.028552  | -2.170214 | 2.553819  |
| 42 | 1 | 0 | 2.758021  | -1.580681 | 3.112719  |
| 43 | 6 | 0 | 2.017989  | -3.601598 | 3.087915  |
| 44 | 1 | 0 | 3.014044  | -4.028083 | 2.954474  |
| 45 | 1 | 0 | 1.313384  | -4.193656 | 2.491784  |
| 46 | 6 | 0 | 1.607983  | -3.617127 | 4.562189  |
| 47 | 1 | 0 | 2.364570  | -3.082979 | 5.146562  |
| 48 | 1 | 0 | 1.577871  | -4.642591 | 4.938412  |
| 49 | 6 | 0 | 0.252081  | -2.936108 | 4.762513  |
| 50 | 1 | 0 | -0.015419 | -2.923729 | 5.822126  |
| 51 | 1 | 0 | -0.520741 | -3.516446 | 4.242389  |
| 52 | 6 | 0 | 0.264555  | -1.509588 | 4.207590  |
| 53 | 1 | 0 | 0.989902  | -0.895720 | 4.748881  |
| 54 | 1 | 0 | -0.714293 | -1.037747 | 4.331718  |
| 55 | 6 | 0 | 0.749849  | -0.100804 | 2.177625  |
| 56 | 8 | 0 | 1.564556  | 0.696753  | 2.612457  |
| 57 | 7 | 0 | -0.101019 | 0.178786  | 1.150262  |
| 58 | 1 | 0 | -0.798405 | -0.500732 | 0.886952  |
| 59 | 6 | 0 | -0.418850 | 1.407696  | -0.991636 |
| 60 | 1 | 0 | -1.489845 | 1.234316  | -1.118258 |
| 61 | 6 | 0 | -0.109664 | 1.476760  | 0.514528  |
| 62 | 1 | 0 | 0.890402  | 1.891437  | 0.652882  |
| 63 | 6 | 0 | -1.149473 | 2.411271  | 1.148174  |
| 64 | 1 | 0 | -2.114495 | 1.900488  | 1.164011  |

|     |   |   |           |           |           |
|-----|---|---|-----------|-----------|-----------|
| 65  | 6 | 0 | -1.204322 | 3.779624  | 0.466829  |
| 66  | 1 | 0 | -2.143550 | 4.284769  | 0.720719  |
| 67  | 6 | 0 | -1.059695 | 3.810165  | -1.047843 |
| 68  | 1 | 0 | -0.752678 | 4.819888  | -1.336373 |
| 69  | 8 | 0 | -0.813501 | 2.764984  | 2.477208  |
| 70  | 8 | 0 | -0.104650 | 4.429660  | 1.080965  |
| 71  | 6 | 0 | -0.113737 | 4.017841  | 2.452563  |
| 72  | 6 | 0 | -0.902994 | 5.009343  | 3.292000  |
| 73  | 1 | 0 | -0.997498 | 4.629657  | 4.309570  |
| 74  | 1 | 0 | -1.902875 | 5.143882  | 2.877464  |
| 75  | 1 | 0 | -0.391017 | 5.971751  | 3.313888  |
| 76  | 6 | 0 | 1.313281  | 3.856480  | 2.926924  |
| 77  | 1 | 0 | 1.312160  | 3.518890  | 3.963456  |
| 78  | 1 | 0 | 1.828693  | 4.816423  | 2.861349  |
| 79  | 1 | 0 | 1.830977  | 3.106369  | 2.333093  |
| 80  | 8 | 0 | -2.381249 | 3.537573  | -1.538497 |
| 81  | 1 | 0 | -2.348398 | 3.573935  | -2.502665 |
| 82  | 6 | 0 | -0.075588 | 2.774867  | -1.585970 |
| 83  | 1 | 0 | -0.140082 | 2.755713  | -2.679240 |
| 84  | 1 | 0 | 0.951490  | 3.040798  | -1.327565 |
| 85  | 6 | 0 | 0.336565  | 0.284556  | -1.668611 |
| 86  | 8 | 0 | 1.548913  | 0.313715  | -1.856143 |
| 87  | 7 | 0 | -0.425221 | -0.759977 | -2.076246 |
| 88  | 1 | 0 | -1.374920 | -0.788258 | -1.733890 |
| 89  | 6 | 0 | -0.765873 | -3.169765 | -2.331001 |
| 90  | 1 | 0 | -1.630666 | -3.025520 | -2.992106 |
| 91  | 6 | 0 | 0.201734  | -1.999564 | -2.521878 |
| 92  | 1 | 0 | 1.066599  | -2.181489 | -1.878515 |
| 93  | 6 | 0 | 0.684233  | -1.927000 | -3.969222 |
| 94  | 1 | 0 | 1.367039  | -1.082053 | -4.063301 |
| 95  | 1 | 0 | -0.175776 | -1.741291 | -4.622498 |
| 96  | 6 | 0 | 1.375003  | -3.236103 | -4.357328 |
| 97  | 1 | 0 | 2.271217  | -3.362608 | -3.740317 |
| 98  | 1 | 0 | 1.707793  | -3.191988 | -5.396157 |
| 99  | 6 | 0 | 0.447119  | -4.433864 | -4.145615 |
| 100 | 1 | 0 | 0.964053  | -5.365153 | -4.385988 |
| 101 | 1 | 0 | -0.407410 | -4.355686 | -4.827194 |
| 102 | 6 | 0 | -0.064093 | -4.484839 | -2.704330 |
| 103 | 1 | 0 | 0.769754  | -4.631305 | -2.010912 |
| 104 | 1 | 0 | -0.752638 | -5.322484 | -2.566806 |
| 105 | 6 | 0 | -1.218195 | -3.197734 | -0.881311 |
| 106 | 8 | 0 | -0.420101 | -3.048216 | 0.037893  |
| 107 | 7 | 0 | -2.547163 | -3.370571 | -0.679615 |
| 108 | 1 | 0 | -3.138099 | -3.532152 | -1.479311 |
| 109 | 6 | 0 | -4.348910 | -2.262536 | 0.560150  |
| 110 | 1 | 0 | -5.122151 | -2.663495 | -0.106071 |
| 111 | 6 | 0 | -3.163870 | -3.231578 | 0.630052  |
| 112 | 1 | 0 | -2.393557 | -2.797220 | 1.269585  |
| 113 | 6 | 0 | -3.599487 | -4.575616 | 1.213272  |
| 114 | 1 | 0 | -2.728978 | -5.232501 | 1.257611  |
| 115 | 1 | 0 | -4.329011 | -5.040115 | 0.539024  |
| 116 | 6 | 0 | -4.219670 | -4.389625 | 2.599505  |
| 117 | 1 | 0 | -3.458492 | -3.996515 | 3.282080  |
| 118 | 1 | 0 | -4.539269 | -5.353885 | 2.998655  |
| 119 | 6 | 0 | -5.399579 | -3.417621 | 2.543530  |
| 120 | 1 | 0 | -5.817113 | -3.266223 | 3.540670  |
| 121 | 1 | 0 | -6.194787 | -3.845180 | 1.923031  |
| 122 | 6 | 0 | -4.973821 | -2.071111 | 1.957333  |
| 123 | 1 | 0 | -4.229057 | -1.603353 | 2.610080  |
| 124 | 1 | 0 | -5.821797 | -1.388715 | 1.882102  |
| 125 | 6 | 0 | -3.921448 | -0.922363 | 0.012031  |
| 126 | 8 | 0 | -2.772677 | -0.524648 | -0.026486 |

|     |   |   |           |           |           |
|-----|---|---|-----------|-----------|-----------|
| 127 | 8 | 0 | -4.950295 | -0.192635 | -0.410235 |
| 128 | 6 | 0 | -4.615625 | 1.116172  | -0.924906 |
| 129 | 1 | 0 | -4.085982 | 1.678818  | -0.157733 |
| 130 | 1 | 0 | -3.929134 | 0.986044  | -1.763745 |
| 131 | 6 | 0 | -5.874228 | 1.822007  | -1.349581 |
| 132 | 6 | 0 | -7.064201 | 1.141601  | -1.594757 |
| 133 | 1 | 0 | -7.112357 | 0.072211  | -1.440897 |
| 134 | 6 | 0 | -5.816198 | 3.204207  | -1.538562 |
| 135 | 1 | 0 | -4.887730 | 3.729709  | -1.343414 |
| 136 | 6 | 0 | -8.189772 | 1.839486  | -2.025301 |
| 137 | 1 | 0 | -9.113514 | 1.305443  | -2.208735 |
| 138 | 6 | 0 | -6.940031 | 3.895931  | -1.975351 |
| 139 | 1 | 0 | -6.888820 | 4.967973  | -2.117804 |
| 140 | 6 | 0 | -8.130659 | 3.215340  | -2.218790 |
| 141 | 1 | 0 | -9.007058 | 3.755537  | -2.553460 |

-----

**Peptide 16:**

| Center<br>Number | Atomic<br>Number | Atomic<br>Type | Coordinates (Angstroms) |           |           |
|------------------|------------------|----------------|-------------------------|-----------|-----------|
|                  |                  |                | X                       | Y         | Z         |
| 1                | 7                | 0              | 3.658488                | -0.129033 | -1.350022 |
| 2                | 6                | 0              | 4.757252                | 0.347605  | -0.722475 |
| 3                | 8                | 0              | 5.862076                | -0.164031 | -0.753254 |
| 4                | 6                | 0              | 5.417146                | 2.106149  | 0.819583  |
| 5                | 8                | 0              | 4.442445                | 1.493607  | -0.069762 |
| 6                | 6                | 0              | 6.638842                | 2.576505  | 0.036371  |
| 7                | 6                | 0              | 4.658269                | 3.302414  | 1.379080  |
| 8                | 6                | 0              | 5.779361                | 1.138846  | 1.941354  |
| 9                | 6                | 0              | 2.550524                | -2.291854 | -1.631861 |
| 10               | 6                | 0              | 3.681316                | -1.364417 | -2.103627 |
| 11               | 6                | 0              | 3.565686                | -1.110298 | -3.608014 |
| 12               | 6                | 0              | 3.580525                | -2.423027 | -4.393658 |
| 13               | 6                | 0              | 2.469361                | -3.359145 | -3.915195 |
| 14               | 6                | 0              | 2.578153                | -3.610360 | -2.410784 |
| 15               | 6                | 0              | 2.725587                | -2.545490 | -0.144565 |
| 16               | 8                | 0              | 3.696943                | -3.142377 | 0.302636  |
| 17               | 7                | 0              | 1.741050                | -2.043489 | 0.636492  |
| 18               | 6                | 0              | 0.796972                | -1.168599 | 2.697505  |
| 19               | 6                | 0              | 1.772592                | -2.177973 | 2.079060  |
| 20               | 6                | 0              | 1.426935                | -3.598311 | 2.534073  |
| 21               | 6                | 0              | 1.449211                | -3.706285 | 4.058908  |
| 22               | 6                | 0              | 0.493238                | -2.692551 | 4.690119  |
| 23               | 6                | 0              | 0.819097                | -1.271968 | 4.227383  |
| 24               | 6                | 0              | 1.174740                | 0.236829  | 2.269823  |
| 25               | 8                | 0              | 2.225391                | 0.758096  | 2.657281  |
| 26               | 7                | 0              | 0.290817                | 0.867560  | 1.478345  |
| 27               | 6                | 0              | -0.427521               | 2.329490  | -0.313860 |
| 28               | 6                | 0              | 0.531274                | 2.176315  | 0.871407  |
| 29               | 6                | 0              | 0.306807                | 3.310994  | 1.881291  |
| 30               | 6                | 0              | 0.368562                | 4.692892  | 1.225885  |
| 31               | 6                | 0              | -0.530809               | 4.810767  | 0.008345  |
| 32               | 8                | 0              | 1.310979                | 3.337272  | 2.881917  |
| 33               | 8                | 0              | 1.687043                | 4.944983  | 0.786966  |
| 34               | 8                | 0              | -1.874752               | 4.733947  | 0.482144  |
| 35               | 6                | 0              | -0.233533               | 3.694941  | -0.985124 |
| 36               | 6                | 0              | -0.202479               | 1.236360  | -1.342909 |
| 37               | 8                | 0              | 0.915208                | 0.828200  | -1.635884 |

|    |   |   |           |           |           |
|----|---|---|-----------|-----------|-----------|
| 38 | 7 | 0 | -1.323619 | 0.787763  | -1.957566 |
| 39 | 6 | 0 | -2.286996 | -1.398921 | -2.526375 |
| 40 | 6 | 0 | -1.279221 | -0.309320 | -2.906996 |
| 41 | 6 | 0 | -1.494365 | 0.148572  | -4.349139 |
| 42 | 6 | 0 | -1.372760 | -1.036211 | -5.310102 |
| 43 | 6 | 0 | -2.343731 | -2.156476 | -4.931528 |
| 44 | 6 | 0 | -2.140494 | -2.597162 | -3.480383 |
| 45 | 6 | 0 | -2.053300 | -1.827431 | -1.088267 |
| 46 | 8 | 0 | -0.936096 | -1.835795 | -0.589744 |
| 47 | 7 | 0 | -3.160487 | -2.206774 | -0.396423 |
| 48 | 6 | 0 | -4.020717 | -1.693316 | 1.842638  |
| 49 | 6 | 0 | -3.095562 | -2.582547 | 1.006730  |
| 50 | 6 | 0 | -3.412731 | -4.058033 | 1.245543  |
| 51 | 6 | 0 | -3.265752 | -4.397068 | 2.731229  |
| 52 | 6 | 0 | -4.150762 | -3.497232 | 3.596430  |
| 53 | 6 | 0 | -3.856619 | -2.017757 | 3.339368  |
| 54 | 6 | 0 | -3.705749 | -0.238471 | 1.599313  |
| 55 | 8 | 0 | -2.598594 | 0.211204  | 1.409061  |
| 56 | 8 | 0 | -4.810825 | 0.522510  | 1.642926  |
| 57 | 6 | 0 | -4.629074 | 1.933416  | 1.452275  |
| 58 | 6 | 0 | -4.671851 | 2.321550  | -0.006916 |
| 59 | 6 | 0 | -4.718623 | 1.382877  | -1.033741 |
| 60 | 6 | 0 | -4.665812 | 3.681416  | -0.328057 |
| 61 | 6 | 0 | -4.733380 | 1.797699  | -2.366698 |
| 62 | 6 | 0 | -4.675834 | 4.094792  | -1.656077 |
| 63 | 6 | 0 | -4.701235 | 3.151168  | -2.682391 |
| 64 | 1 | 0 | 2.790049  | 0.380922  | -1.260153 |
| 65 | 1 | 0 | 6.324383  | 3.222386  | -0.786355 |
| 66 | 1 | 0 | 7.190792  | 1.729882  | -0.363032 |
| 67 | 1 | 0 | 7.288500  | 3.153577  | 0.698907  |
| 68 | 1 | 0 | 3.782727  | 2.956422  | 1.929406  |
| 69 | 1 | 0 | 4.336158  | 3.956044  | 0.565560  |
| 70 | 1 | 0 | 5.302292  | 3.867535  | 2.055795  |
| 71 | 1 | 0 | 6.326910  | 0.284002  | 1.550622  |
| 72 | 1 | 0 | 4.865892  | 0.793797  | 2.429047  |
| 73 | 1 | 0 | 6.399156  | 1.656344  | 2.677829  |
| 74 | 1 | 0 | 1.594836  | -1.784756 | -1.805271 |
| 75 | 1 | 0 | 4.634750  | -1.845028 | -1.875899 |
| 76 | 1 | 0 | 4.385819  | -0.459272 | -3.918513 |
| 77 | 1 | 0 | 2.629270  | -0.569171 | -3.794347 |
| 78 | 1 | 0 | 4.547354  | -2.916145 | -4.246236 |
| 79 | 1 | 0 | 3.481383  | -2.226677 | -5.464348 |
| 80 | 1 | 0 | 2.506619  | -4.306209 | -4.459753 |
| 81 | 1 | 0 | 1.495536  | -2.901271 | -4.134571 |
| 82 | 1 | 0 | 3.515907  | -4.122756 | -2.178147 |
| 83 | 1 | 0 | 1.763841  | -4.255804 | -2.068455 |
| 84 | 1 | 0 | 0.913209  | -1.675309 | 0.192216  |
| 85 | 1 | 0 | -0.212226 | -1.398348 | 2.331268  |
| 86 | 1 | 0 | 2.785125  | -1.930503 | 2.410275  |
| 87 | 1 | 0 | 2.141248  | -4.283522 | 2.076696  |
| 88 | 1 | 0 | 0.428238  | -3.848161 | 2.151548  |
| 89 | 1 | 0 | 2.465748  | -3.509816 | 4.415662  |
| 90 | 1 | 0 | 1.191964  | -4.720962 | 4.372172  |
| 91 | 1 | 0 | 0.539074  | -2.747516 | 5.780429  |
| 92 | 1 | 0 | -0.536747 | -2.940387 | 4.401877  |
| 93 | 1 | 0 | 1.816094  | -0.982321 | 4.568996  |
| 94 | 1 | 0 | 0.112137  | -0.554494 | 4.653253  |
| 95 | 1 | 0 | -0.584751 | 0.406569  | 1.275376  |
| 96 | 1 | 0 | -1.455507 | 2.268087  | 0.059595  |
| 97 | 1 | 0 | 1.564621  | 2.202792  | 0.514709  |
| 98 | 1 | 0 | -0.682711 | 3.170256  | 2.332224  |
| 99 | 1 | 0 | 0.053835  | 5.432673  | 1.971866  |

|     |   |   |           |           |           |
|-----|---|---|-----------|-----------|-----------|
| 100 | 1 | 0 | -0.343326 | 5.782813  | -0.459356 |
| 101 | 1 | 0 | 1.743132  | 2.460152  | 2.927838  |
| 102 | 1 | 0 | 2.250465  | 4.624667  | 1.509935  |
| 103 | 1 | 0 | -2.447950 | 4.653329  | -0.290743 |
| 104 | 1 | 0 | 0.795112  | 3.788880  | -1.337271 |
| 105 | 1 | 0 | -0.898682 | 3.777799  | -1.852654 |
| 106 | 1 | 0 | -2.217407 | 1.158032  | -1.670213 |
| 107 | 1 | 0 | -3.304966 | -0.996958 | -2.622518 |
| 108 | 1 | 0 | -0.277584 | -0.730388 | -2.814288 |
| 109 | 1 | 0 | -0.755792 | 0.917584  | -4.583487 |
| 110 | 1 | 0 | -2.486173 | 0.608635  | -4.439643 |
| 111 | 1 | 0 | -0.347565 | -1.419766 | -5.270392 |
| 112 | 1 | 0 | -1.551621 | -0.710458 | -6.336732 |
| 113 | 1 | 0 | -2.216284 | -3.011743 | -5.598294 |
| 114 | 1 | 0 | -3.373427 | -1.802028 | -5.057677 |
| 115 | 1 | 0 | -1.136453 | -3.014538 | -3.350706 |
| 116 | 1 | 0 | -2.854154 | -3.380431 | -3.210938 |
| 117 | 1 | 0 | -4.040201 | -2.273780 | -0.883841 |
| 118 | 1 | 0 | -5.064034 | -1.865407 | 1.557562  |
| 119 | 1 | 0 | -2.064495 | -2.387823 | 1.301439  |
| 120 | 1 | 0 | -2.738827 | -4.666345 | 0.639344  |
| 121 | 1 | 0 | -4.437223 | -4.268498 | 0.914942  |
| 122 | 1 | 0 | -2.218378 | -4.263213 | 3.022596  |
| 123 | 1 | 0 | -3.511925 | -5.446699 | 2.901408  |
| 124 | 1 | 0 | -3.999792 | -3.722125 | 4.653999  |
| 125 | 1 | 0 | -5.204018 | -3.697590 | 3.372164  |
| 126 | 1 | 0 | -2.827227 | -1.784556 | 3.632968  |
| 127 | 1 | 0 | -4.520350 | -1.381516 | 3.928250  |
| 128 | 1 | 0 | -5.451304 | 2.397791  | 1.993350  |
| 129 | 1 | 0 | -3.682220 | 2.242940  | 1.895059  |
| 130 | 1 | 0 | -4.749099 | 0.327027  | -0.795234 |
| 131 | 1 | 0 | -4.641654 | 4.417237  | 0.468688  |
| 132 | 1 | 0 | -4.778606 | 1.059814  | -3.158844 |
| 133 | 1 | 0 | -4.675083 | 5.152276  | -1.890618 |
| 134 | 1 | 0 | -4.711923 | 3.470659  | -3.716243 |

---

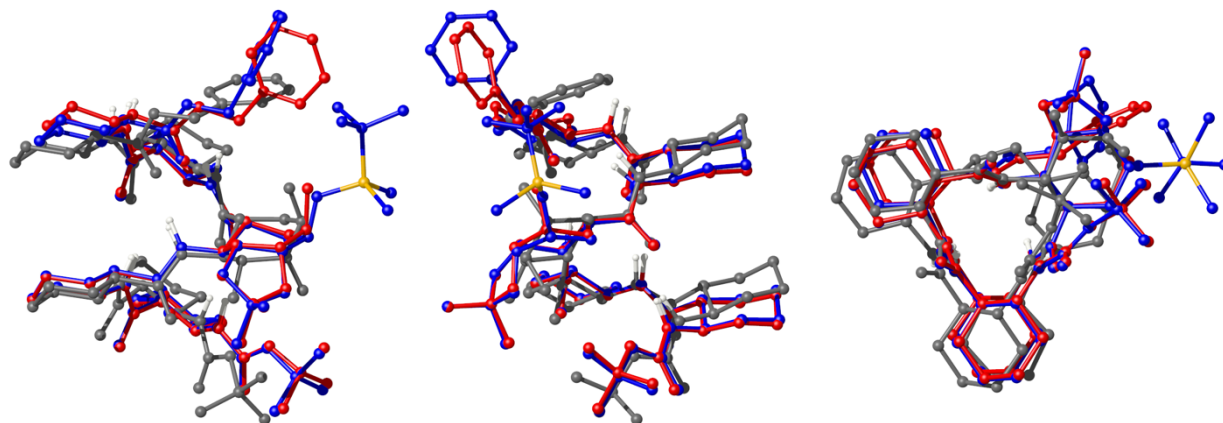

**Figure S57:** Alignment of the models of peptides **14-16** calculated from NMR data and further optimized at the M052X DFT level. Compound colours: **14** *blue*, **15** *red*, **16** *grey*. Atom colours: Si *yellow*, H<sup>N</sup> *white*; hydrogen atoms not bound to nitrogen have been omitted for clarity. RMSD of backbone heavy atoms = 0.246 Å (carbonyl C, C $\alpha$ , C $\beta$ , N).

## VII. X-RAY OF COMPOUND 3

### Crystal data

$C_{32}H_{47}NO_5Si$   
 $M_r = 553.79$   
Monoclinic,  $P2_1$   
 $a = 7.7332$  (3)  
 $b = 8.4891$   
(4)  $c =$   
 $24.0949$  (9)  $\text{\AA}$   $\beta$   
 $= 95.619$  (2) $^\circ$   
 $V = 1574.18$  (11)  
 $\text{\AA}^3$   $Z = 2$

### Data collection

$\kappa$ -geometry  
diffractometer  
Radiation source: sealed x-ray tube, SIEMENS  
KFN MO 2K-90  
Graphite monochromator  
Detector resolution: 8.3333 pixels  
 $\text{mm}^{-1}$   $\varphi$  or  $\omega$  oscillation scans  
Absorption correction: multi-scan  
SADABS2016/2 - Bruker AXS area detector  
scaling and absorption correction

### Refinement

Refinement on  $F^2$   
Least-squares matrix: full  
 $R[F^2 > 2\sigma(F^2)] = 0.042$   
 $wR(F^2) = 0.085$   
 $S = 1.05$   
7146 reflections  
361 parameters  
1 restraint

### Special details

$\Delta\rho_{max} = 0.24 \text{ e \AA}^{-3}$   
 $\Delta\rho_{min} = -0.23 \text{ e \AA}^{-3}$   
Absolute structure: Flack  $x$  determined using 2459  
quotients  $[(I^+)-(I^-)]/[(I^+)+(I^-)]$  (Parsons, Flack  
and Wagner, Acta Cryst. B69 (2013) 249-259).  
Absolute structure parameter:  $-0.01$  (5)

$F(000) = 600$   
 $D_x = 1.168 \text{ Mg m}^{-3}$   
Mo  $K\alpha$  radiation,  $\lambda = 0.71073 \text{ \AA}$  Cell parameters from 9346  
reflections  $\theta = 2.6\text{--}27.4^\circ$   $\mu = 0.11 \text{ mm}^{-1}$   
 $T = 100 \text{ K}$   
Plate, clear colourless  
 $0.89 \times 0.74 \times 0.13 \text{ mm}$

$T_{min} = 0.85$ ,  $T_{max} = 0.99$   
25016 measured reflections  
7146 independent reflections  
6355 reflections with  $I > 2\sigma(I)$   $R_{int} = 0.035$   
 $\theta_{max} = 27.6^\circ$ ,  $\theta_{min} = 1.7^\circ$   $h = -10 \rightarrow 10$   $k =$   
 $-11 \rightarrow 11$   $l = -31 \rightarrow 20$

Primary atom site location: dual  
Secondary atom site location: difference Fourier map  
Hydrogen site location: difference Fourier map H-atom  
parameters constrained  $w = 1/[\sigma^2(F_o^2) + (0.0338P)^2 +$   
 $0.3617P]$   
where  $P = (F_o^2 + 2F_c^2)/3$   
 $(\Delta/\sigma)_{max} < 0.001$



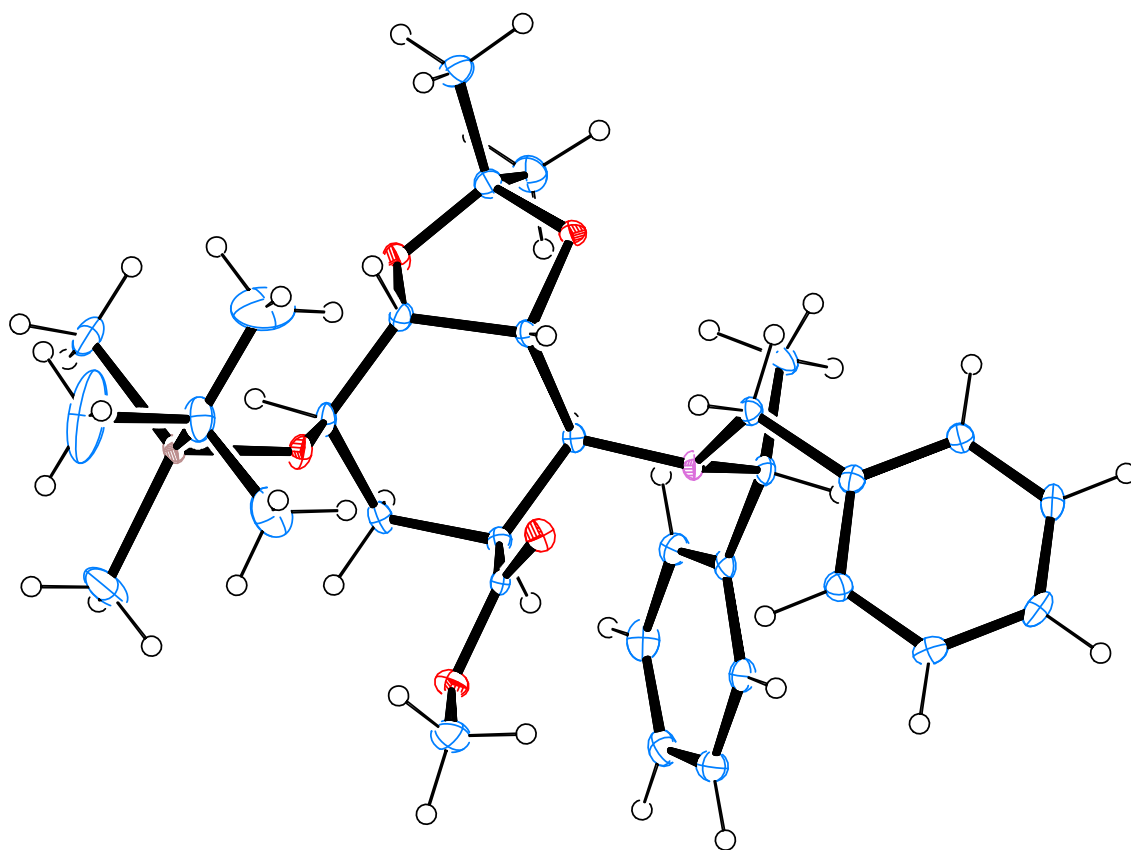

**Figure S58:** ORTEP diagram for compound 3.
